# Supplementary material for: Enantioselective Pd-catalyzed hydrogenation of enesulfonamides
Source: Royal Society of Chemistry journal article supplement (doi:10.1039/c1cc10313j), 2011-01-01
Supplement: c1cc10313j.pdf [file c1cc10313j.pdf]

## Supporting Information

# Enantioselective Pd-Catalyzed Hydrogenation of Enesulfonamides

Chang-Bin Yu, Kai Gao, Duo-Sheng Wang, Lei Shi and Yong-Gui Zhou\*

State Key Laboratory of Catalysis, Dalian Institute of Chemical Physics, Chinese Academy of Sciences, 457 Zhongshan Road, Dalian 116023.

## 1. General and Materials

**General:** All reactions were carried out under an atmosphere of nitrogen using standard Schlenk techniques or in a nitrogen-filled glovebox, unless otherwise noted. The chemical shifts for  $^1\text{H}$  NMR were recorded in ppm downfield from tetramethylsilane (TMS) with the solvent resonance as the internal standard. The chemical shifts for  $^{13}\text{C}$  NMR were recorded in ppm downfield using the central peak of d-chloroform (77.23 ppm) as the internal standard. Coupling constants ( $J$ ) are reported in Hz and refer to apparent peak multiplications. Flash column chromatography was performed on silica gel (200-300 mesh). Optical rotations were measured with JASCO P-1010 polarimeter. The configuration was determined by comparison of rotation sign with the literature data or by analogue.

**Materials:** Commercially available reagents were used throughout without further purification. Acetone was distilled from anhydrous  $\text{CaSO}_4$ . The other solvents for asymmetric hydrogenation reaction were purchased without further purification. (*S,S*)-f-Binaphane was prepared according to the literature.<sup>1</sup>

## 2. Typical Procedure for Synthesis of Intermediate Ketones (1)

Intermediate ketones **1** were prepared from the corresponding substituted starting materials according to the procedures reported in the literature.<sup>2,3</sup>

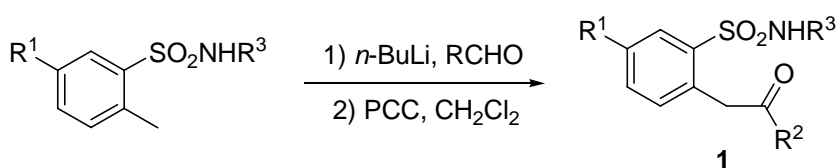

To a solution of the intermediate alcohol (2.1 mmol) in  $\text{CH}_2\text{Cl}_2$  (15 mL) was added PCC (888 mg, 4.1 mmol). The resulting dark-brown solution was stirred for overnight at ambient temperature. After addition of  $\text{Et}_2\text{O}$  (50 mL) and additional stirring (30 min), the mixture was filtered ( $\text{Et}_2\text{O}$ ) through a short pad of silica gel. Concentration in vacuo afforded the analytically pure ketones **1**.

**2-(*o*-tert-Butyl phenylsulfonylcarbamate)-1-phenylethanone (1a).** Yield: 81%, mp = 129-131  $^\circ\text{C}$ ,  $^1\text{H}$  NMR (400 MHz,  $\text{CDCl}_3$ ):  $\delta$  1.38 (s, 9H), 4.84 (s, 2H), 7.16 (br, 1H), 7.32-7.33 (m, 1H), 7.49-7.53 (m, 3H), 7.59-7.63 (m, 2H), 8.05 (d,  $J$  = 8.2 Hz, 1H), 8.23 (d,  $J$  = 7.8 Hz, 1H).  $^{13}\text{C}$  NMR (100 MHz,  $\text{CDCl}_3$ ):  $\delta$  28.0, 43.6, 84.4, 126.1, 127.8, 128.6, 129.0, 131.7, 133.7, 133.8, 134.0, 134.6, 136.6, 137.6, 148.9, 196.8. HRMS Calculated for  $\text{C}_{19}\text{H}_{21}\text{NO}_5\text{SNa}$  ( $\text{M}+\text{Na}$ )<sup>+</sup> 398.1038, found: 398.1049.

**2-(*o*-tert-Butyl phenylsulfonylcarbamate)-1-*o*-tolylethanone (1b).** Yield: 97%, mp = 131-132 °C, <sup>1</sup>H NMR (400 MHz, CDCl<sub>3</sub>): δ 1.35 (s, 9H), 2.49 (s, 3H), 4.74 (s, 2H), 7.25-7.31 (m, 1H), 7.38-7.39 (m, 1H), 7.45-7.49 (m, 1H), 7.58-7.60 (m, 1H), 7.72 (br, 1H), 7.86 (d, *J* = 7.5 Hz, 1H), 8.19 (d, *J* = 7.0 Hz, 1H). <sup>13</sup>C NMR (100 MHz, CDCl<sub>3</sub>): δ 21.8, 28.0, 46.2, 84.4, 126.1, 127.7, 129.2, 131.6, 132.1, 132.4, 133.7, 133.9, 134.8, 136.9, 137.7, 139.2, 149.3. HRMS Calculated for C<sub>20</sub>H<sub>23</sub>NO<sub>5</sub>SNa (M+Na)<sup>+</sup> 412.1195, found: 412.1201.

**2-(*o*-tert-Butyl phenylsulfonylcarbamate)-1-*m*-tolylethanone (1c).** Yield: 99%, mp = 121-123 °C, <sup>1</sup>H NMR (400 MHz, CDCl<sub>3</sub>): δ 1.35 (s, 9H), 2.39 (s, 3H), 4.79 (s, 2H), 7.28-7.30 (m, 1H), 7.35-7.38 (m, 2H), 7.46-7.48 (m, 1H), 7.57-7.59 (m, 1H), 7.82-7.84 (m, 2H), 8.20 (d, *J* = 7.9 Hz, 1H). <sup>13</sup>C NMR (100 MHz, CDCl<sub>3</sub>): δ 21.6, 28.0, 43.6, 84.3, 125.8, 127.6, 128.9, 129.1, 131.6, 133.7, 133.9, 134.5, 134.8, 136.6, 137.6, 138.8, 149.2. 197.1. HRMS Calculated for C<sub>20</sub>H<sub>23</sub>NO<sub>5</sub>SNa (M+Na)<sup>+</sup> 412.1195, found: 412.1181.

**2-(*o*-tert-Butyl phenylsulfonylcarbamate)-1-*p*-tolylethanone (1d).** Yield: 77%, mp = 142-143 °C, <sup>1</sup>H NMR (400 MHz, CDCl<sub>3</sub>): δ 1.37 (s, 9H), 2.43 (s, 3H), 4.79 (s, 2H), 7.28-7.33 (m, 4H), 7.46-7.49 (m, 1H), 7.58-7.62 (m, 1H), 7.94 (d, *J* = 8.1 Hz, 1H), 8.22 (d, *J* = 7.9 Hz, 1H). <sup>13</sup>C NMR (100 MHz, CDCl<sub>3</sub>): δ 21.9, 28.0, 43.4, 84.3, 127.7, 128.7, 129.7, 131.6, 133.7, 133.9, 134.8, 144.7, 196.5. HRMS Calculated for C<sub>20</sub>H<sub>23</sub>NO<sub>5</sub>SNa (M+Na)<sup>+</sup> 412.1195, found: 412.1201.

**2-(*o*-tert-Butyl phenylsulfonylcarbamate)-1-*p*-methoxyphenylethanone (1e).** Yield: 83%, mp = 142-143 °C, <sup>1</sup>H NMR (400 MHz, CDCl<sub>3</sub>): δ 1.37 (s, 9H), 3.88 (s, 3H), 4.77 (s, 2H), 6.95 (d, *J* = 8.6 Hz, 2H), 7.31 (d, *J* = 7.5 Hz, 1H), 7.45-7.49 (m, 2H), 7.57-7.59 (m, 1H), 8.02 (d, *J* = 8.6 Hz, 2H), 8.21 (d, *J* = 7.9 Hz, 1H). <sup>13</sup>C NMR (100 MHz, CDCl<sub>3</sub>): δ 28.0, 43.1, 55.7, 84.3, 114.2, 127.6, 129.6, 130.9, 131.6, 133.6, 133.9, 134.9, 137.5, 149.0, 164.1, 195.4. HRMS Calculated for C<sub>20</sub>H<sub>23</sub>NO<sub>6</sub>SNa (M+Na)<sup>+</sup> 428.1144, found: 428.1138.

**2-(*o*-tert-Butyl phenylsulfonylcarbamate)-1-*p*-fluorophenylethanone (1f).** Yield: 77%, mp = 141-142 °C, <sup>1</sup>H NMR (400 MHz, CDCl<sub>3</sub>): δ 1.36 (s, 9H), 4.79 (s, 2H), 7.13-7.17 (m, 2H), 7.31 (d, *J* = 7.5 Hz, 1H), 7.47-7.51 (m, 2H), 7.59-7.63 (m, 1H), 8.05-8.07 (m, 2H), 8.20 (d, *J* = 7.9 Hz, 1H). <sup>13</sup>C NMR (100 MHz, CDCl<sub>3</sub>): δ 27.9, 43.4, 84.5, 115.9, 116.2, 127.7, 131.2, 131.3, 131.6, 132.9, 133.6, 134.0, 134.5, 137.5, 149.3, 164.9, 167.4, 195.4. HRMS Calculated for C<sub>19</sub>H<sub>20</sub>FNO<sub>5</sub>FSNa (M+Na)<sup>+</sup> 416.0944, found: 416.0928.

**2-(*o*-tert-Butyl phenylsulfonylcarbamate)-1-*p*-chlorophenylethanone (1g).** Yield: 92%, mp = 153-155 °C, <sup>1</sup>H NMR (400 MHz, CDCl<sub>3</sub>): δ 1.36 (s, 9H), 4.78 (d, *J* = 3.2 Hz, 2H), 7.29-7.32 (m, 1H), 7.44-7.51 (m, 3H), 7.59-7.61 (m, 1H), 7.96-7.99 (m, 2H), 8.19-8.22 (m, 1H). <sup>13</sup>C NMR (100 MHz, CDCl<sub>3</sub>): δ 28.0, 43.6, 84.5, 127.9, 129.3, 130.0, 131.6, 133.6, 134.0, 134.3, 134.9, 137.6, 140.2, 149.1, 195.8. HRMS Calculated for C<sub>19</sub>H<sub>20</sub>NO<sub>5</sub>SClNa (M+Na)<sup>+</sup> 432.0648, found: 432.0661.

**tert-Butyl 2-(2-oxopropyl)phenylsulfonylcarbamate (1h).** Yield: 85%, mp = 146-147 °C, <sup>1</sup>H NMR (400 MHz, CDCl<sub>3</sub>): δ 1.38 (s, 9H), 2.26 (s, 3H), 4.22 (s, 2H), 7.45-7.49 (m, 1H), 7.57-7.61 (m, 2H), 8.18 (d, *J* = 8.0 Hz, 1H). <sup>13</sup>C NMR (100 MHz, CDCl<sub>3</sub>): δ 28.0, 30.0, 48.5, 84.5, 127.8, 131.5, 133.6, 134.0, 134.2, 137.5, 149.4, 205.7. HRMS Calculated for C<sub>14</sub>H<sub>19</sub>NO<sub>5</sub>NaS (M+Na)<sup>+</sup> 336.0882, found: 336.0896.

**tert-Butyl 2-(2-oxopentyl)phenylsulfonylcarbamate (1i).** Yield: 88%, mp = 120-121 °C, <sup>1</sup>H NMR (400 MHz, CDCl<sub>3</sub>): δ 0.90 (t, *J* = 7.4 Hz, 3H), 1.37 (s, 9H), 1.59-1.65 (m, 2H), 2.52 (t, *J* = 7.4 Hz, 2H), 4.19 (s, 2H), 7.28 (d, *J* = 7.4 Hz, 1H), 7.43-7.47 (m, 1H), 7.57-7.60 (m, 1H), 8.16 (d, *J* = 7.9 Hz, 1H), 8.28 (br, 1H). <sup>13</sup>C NMR (100 MHz, CDCl<sub>3</sub>): δ 13.8, 17.2, 28.0, 44.6, 47.6, 84.5, 127.6, 131.5, 133.7, 133.9, 134.3, 137.4, 149.6, 207.7. HRMS Calculated for C<sub>16</sub>H<sub>23</sub>NO<sub>5</sub>SNa (M+Na)<sup>+</sup> 364.1195,

found: 364.1190.

**tert-Butyl 2-(2-oxoheptyl)phenylsulfonycarbamate (1j).** Yield: 88%, mp = 106-107 °C, <sup>1</sup>H NMR (400 MHz, CDCl<sub>3</sub>): δ 0.87-0.90 (m, 3H), 1.25-1.34 (m, 4H), 1.38 (s, 9H), 1.59-1.63 (m, 2H), 2.52-2.55 (m, 2H), 4.19 (s, 2H), 7.26-7.28 (m, 1H), 7.46-7.48 (m, 1H), 7.57-7.58 (m, 1H), 7.62 (br, 1H), 8.17-8.19 (m, 1H). <sup>13</sup>C NMR (100 MHz, CDCl<sub>3</sub>): δ 14.1, 22.6, 23.5, 28.0, 31.5, 42.8, 47.8, 84.4, 127.7, 131.5, 133.6, 133.9, 134.2, 207.8. HRMS Calculated for C<sub>21</sub>H<sub>23</sub>NO<sub>5</sub>Na (M+Na)<sup>+</sup> 392.1474, found: 392.1493.

**tert-Butyl 2-(2-oxo-4-phenylbutyl)phenylsulfonycarbamate (1k).** Yield: 88%, mp = 117-119 °C, <sup>1</sup>H NMR (400 MHz, CDCl<sub>3</sub>): δ 1.38 (s, 9H), 2.88-2.94 (m, 4H), 4.17 (s, 2H), 7.18-7.21 (m, 5H), 7.27-7.29 (m, 2H), 7.45 (m, 1H), 7.56 (m, 1H), 8.17 (m, 1H). <sup>13</sup>C NMR (100 MHz, CDCl<sub>3</sub>): δ 27.9, 29.7, 43.9, 47.6, 84.4, 126.2, 127.5, 128.5, 128.6, 131.4, 133.6, 133.9, 134.0, 137.3, 140.9, 149.6, 206.7. HRMS Calculated for C<sub>21</sub>H<sub>25</sub>NO<sub>5</sub>Na (M+Na)<sup>+</sup> 426.1351, found: 426.1364.

**2-(o-tert-Butyl -m-tolylsulfonycarbamate)-1-phenylethanone (1l).** Yield: 98%, mp = 133-135 °C, <sup>1</sup>H NMR (400 MHz, CDCl<sub>3</sub>): δ 1.17 (s, 9H), 2.39 (s, 3H), 4.68 (s, 1H), 4.75 (m, 2H), 7.14-7.16 (m, 1H), 7.29-7.31 (m, 1H), 7.45-7.49 (m, 2H), 7.56-7.58 (m, 1H), 7.91 (br, 1H), 8.05 (d, *J* = 7.8 Hz, 1H). <sup>13</sup>C NMR (100 MHz, CDCl<sub>3</sub>): δ 21.2, 30.1, 42.9, 55.5, 128.7, 129.0, 130.2, 130.7, 133.4, 133.7, 136.7, 137.7, 141.1, 197.9. HRMS Calculated for C<sub>19</sub>H<sub>23</sub>NO<sub>3</sub>Na (M+Na)<sup>+</sup> 368.1296, found: 368.1309.

**tert-Butyl 2-(2-(furan-2-yl)-2-oxoethyl)phenylsulfonycarbamate (1m).** Yield: 77%, mp = 133-134 °C, <sup>1</sup>H NMR (400 MHz, CDCl<sub>3</sub>): δ 1.35 (s, 9H), 4.69 (s, 2H), 6.58 (br, 1H), 7.31-7.32 (m, 1H), 7.36-7.38 (m, 1H), 7.46-7.50 (m, 1H), 7.58-7.64 (m, 2H), 8.22 (d, *J* = 0.8 Hz, 1H). <sup>13</sup>C NMR (100 MHz, CDCl<sub>3</sub>): δ 28.0, 43.0, 112.8, 118.3, 127.9, 131.6, 133.7, 133.9, 147.0. HRMS Calculated for C<sub>17</sub>H<sub>19</sub>NO<sub>6</sub>Na (M+Na)<sup>+</sup> 388.0831, found: 388.0836.

### 3. Typical Procedure for Synthesis of Cyclic Enesulfonamides (2)

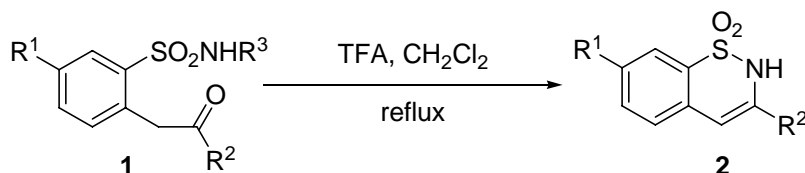

TFA (0.24 mL, 3.0 mmol) were added to a solution of ketone compound **1** (1.0 mmol) in CH<sub>2</sub>Cl<sub>2</sub> (20 mL). The resulting solution was heated to reflux for overnight, then cooled to ambient temperature and filtered through a pad of silica gel. Concentration in vacuo and purification by flash chromatography afforded cyclic enesulfonamides **2**.

**3-Phenyl-2H-1λ<sup>6</sup>-benzo[e][1,2]thiazine 1,1-Dioxide (2a)** (known compound<sup>4</sup>). Yield: 90%, mp = 202-204 °C, <sup>1</sup>H NMR (400 MHz, CDCl<sub>3</sub>): δ 6.68 (s, 1H), 6.87 (s, 1H), 7.48-7.51 (m, 5H), 7.60-7.64 (m, 1H), 7.70-7.72 (m, 2H), 7.91 (d, *J* = 7.6 Hz, 1H). <sup>13</sup>C NMR (100 MHz, CDCl<sub>3</sub>): δ 106.9, 121.6, 126.8, 127.8, 129.4, 130.5, 132.4, 134.4.

**3-o-Tolyl-2H-1λ<sup>6</sup>-benzo[e][1,2]thiazine 1,1-Dioxide (2b).** Yield: 77%, mp = 155-156 °C, <sup>1</sup>H NMR (400 MHz, CDCl<sub>3</sub>): δ 2.46 (s, 3H), 6.24 (s, 1H), 7.02 (s, 1H), 7.21-7.46 (m, 6H), 7.56-7.58 (m, 1H), 7.82 (d, *J* = 7.8 Hz, 1H). <sup>13</sup>C NMR (100 MHz, CDCl<sub>3</sub>): δ 20.2, 108.5, 121.5, 126.3, 127.4, 127.6, 129.8, 130.1, 131.3, 132.4, 133.7, 134.6, 137.8, 139.7. HRMS Calculated for C<sub>15</sub>H<sub>13</sub>NO<sub>2</sub>Na (M+Na)<sup>+</sup> 294.0565, found: 294.0561.

**3-m-Tolyl-2H-1λ<sup>6</sup>-benzo[e][1,2]thiazine 1,1-Dioxide (2c).** Yield: 90%, mp = 218-219 °C, <sup>1</sup>H NMR (400 MHz, CDCl<sub>3</sub>): δ 2.43 (s, 3H), 6.64-6.66 (m, 1H), 6.89 (br, 1H), 7.25-7.29 (m, 1H),

7.35-7.38 (m, 1H), 7.48-7.50 (m, 4H), 7.58-7.61 (m, 1H), 7.90 (d,  $J = 7.9$  Hz, 1H).  $^{13}\text{C}$  NMR (100 MHz,  $\text{CDCl}_3$ ):  $\delta$  21.6, 106.7, 121.6, 123.9, 127.4, 127.7, 129.2, 131.3, 132.4. HRMS Calculated for  $\text{C}_{15}\text{H}_{13}\text{NO}_2\text{SNa}$  ( $\text{M}+\text{Na}$ ) $^+$  294.0565, found: 294.0555.

**3-*p*-Tolyl-2*H*-1 $\lambda^6$ -benzo[*e*][1,2]thiazine 1,1-Dioxide (2d).** Yield: 77%, mp = 270-271 °C,  $^1\text{H}$  NMR (400 MHz,  $\text{d}^6$ -DMSO):  $\delta$  2.37(s, 3H), 6.94 (s, 1H), 7.32 (d,  $J = 0.8$  Hz, 2H), 7.52-7.55 (m, 1H), 7.66-7.68 (m, 4H), 7.82 (d,  $J = 0.8$  Hz, 1H), 11.00 (br, 1H).  $^{13}\text{C}$  NMR (100 MHz,  $\text{d}^6$ -DMSO):  $\delta$  21.5, 105.7, 121.2, 127.2, 128.0, 128.2, 130.0, 131.9, 132.6, 134.2, 139.8, 140.3. HRMS Calculated for  $\text{C}_{15}\text{H}_{13}\text{NO}_2\text{SNa}$  ( $\text{M}+\text{Na}$ ) $^+$  294.0565, found: 294.0551.

**3-*p*-Methoxyphenyl-2*H*-1 $\lambda^6$ -benzo[*e*][1,2]thiazine 1,1-Dioxide (2e).** Yield: 78%, mp = 209-211 °C,  $^1\text{H}$  NMR (400 MHz,  $\text{CDCl}_3$ ):  $\delta$  3.86 (s, 3H), 6.58 (s, 1H), 6.84 (m, 1H), 6.96-6.99 (m, 2H), 7.46-7.48 (m, 2H), 7.58-7.65 (m, 3H), 7.89 (d,  $J = 7.4$  Hz, 1H).  $^{13}\text{C}$  NMR (100 MHz,  $\text{CDCl}_3$ ):  $\delta$  55.7, 105.6, 114.7, 121.6, 127.5, 127.6, 128.3, 132.4. HRMS Calculated for  $\text{C}_{15}\text{H}_{13}\text{NO}_3\text{SNa}$  ( $\text{M}+\text{Na}$ ) $^+$  310.0514, found: 310.0504.

**3-*p*-Fluorophenyl-2*H*-1 $\lambda^6$ -benzo[*e*][1,2]thiazine 1,1-Dioxide (2f).** Yield: 77%, mp = 236-237 °C,  $^1\text{H}$  NMR (400 MHz,  $\text{d}^6$ -DMSO):  $\delta$  6.96-6.99 (m, 1H), 7.31-7.39 (m, 2H), 7.54-7.58 (m, 1H), 7.65-7.71 (m, 2H), 7.82-7.85 (m, 3H), 10.08 (br, 1H).  $^{13}\text{C}$  NMR (100 MHz,  $\text{d}^6$ -DMSO):  $\delta$  106.4, 116.1, 116.4, 121.0, 128.1, 129.4, 129.5, 131.1, 131.9, 132.5, 133.9, 138.6, 162.3, 164.7. HRMS Calculated for  $\text{C}_{14}\text{H}_{10}\text{FNO}_2\text{SNa}$  ( $\text{M}+\text{Na}$ ) $^+$  298.0314, found: 298.0301.

**3-*p*-Chlorophenyl-2*H*-1 $\lambda^6$ -benzo[*e*][1,2]thiazine 1,1-Dioxide (2g).** Yield: 93%, mp = 273-275 °C,  $^1\text{H}$  NMR (400 MHz, DMSO):  $\delta$  7.05 (s, 1H), 7.55-7.59 (m, 3H), 7.68-7.73 (m, 2H), 7.79-7.85 (m, 3H), 11.1 (br, 1H).  $^{13}\text{C}$  NMR (100 MHz, DMSO):  $\delta$  107.2, 121.2, 128.4, 128.5, 128.9, 129.5, 132.2, 132.8, 133.6, 133.9, 135.1, 138.5. HRMS Calculated for  $\text{C}_{14}\text{H}_{10}\text{NO}_2\text{SClNa}$  ( $\text{M}+\text{Na}$ ) $^+$  314.0018, found: 314.0013.

**3-Methyl-2*H*-1 $\lambda^6$ -benzo[*e*][1,2]thiazine 1,1-Dioxide (2h)** (known compound<sup>5</sup>). Yield: 89%, mp = 106-107 °C,  $^1\text{H}$  NMR (400 MHz,  $\text{CDCl}_3$ ):  $\delta$  2.16 (s, 3H), 6.04 (s, 1H), 7.17 (br, 1H), 7.29-7.31 (m, 1H), 7.41-7.42 (m, 1H), 7.52-7.54 (m, 1H), 7.86 (d,  $J = 7.9$  Hz, 1H).  $^{13}\text{C}$  NMR (100 MHz,  $\text{CDCl}_3$ ):  $\delta$  21.2, 105.6, 121.5, 126.6, 126.9, 132.4.

**3-Propyl-2*H*-1 $\lambda^6$ -benzo[*e*][1,2]thiazine 1,1-Dioxide (2i).** Yield: 95%, mp = 78-80 °C,  $^1\text{H}$  NMR (400 MHz,  $\text{CDCl}_3$ ):  $\delta$  0.97-1.00 (m, 3H), 1.65-1.71 (m, 2H), 2.36-2.39 (m, 2H), 6.06 (s, 1H), 7.14 (br, 1H), 7.30-7.32 (m, 1H), 7.38-7.42 (m, 1H), 7.52-7.56 (m, 1H), 7.86 (d,  $J = 7.9$  Hz, 1H).  $^{13}\text{C}$  NMR (100 MHz,  $\text{CDCl}_3$ ):  $\delta$  13.5, 20.5, 36.8, 105.4, 121.4, 126.8, 126.9, 132.3, 133.8, 140.9. HRMS Calculated for  $\text{C}_{11}\text{H}_{13}\text{NO}_2\text{SNa}$  ( $\text{M}+\text{Na}$ ) $^+$  274.0878, found: 274.0881.

**3-Amyl-2*H*-1 $\lambda^6$ -benzo[*e*][1,2]thiazine 1,1-Dioxide (2j).** Yield: 73%, mp = 81-83 °C,  $^1\text{H}$  NMR (400 MHz,  $\text{CDCl}_3$ ):  $\delta$  0.89-0.93 (m, 3H), 1.34-1.59 (m, 4H), 1.63-1.67 (m, 2H), 2.37-2.41 (m, 2H), 6.07 (s, 1H), 6.72(br, 1H), 7.31-7.33 (m, 1H), 7.39-7.43 (m, 1H), 7.53-7.57 (m, 1H), 7.86 (d,  $J = 7.6$  Hz, 1H).  $^{13}\text{C}$  NMR (100 MHz,  $\text{CDCl}_3$ ):  $\delta$  14.1, 22.5, 26.9, 31.2, 34.9, 105.0, 121.4, 126.8, 126.9, 130.7, 132.3, 133.9, 141.2. HRMS Calculated for  $\text{C}_{11}\text{H}_{13}\text{NO}_2\text{SNa}$  ( $\text{M}+\text{Na}$ ) $^+$  246.0565, found: 246.0556.

**3-(2-Phenylethyl)-2*H*-1 $\lambda^6$ -benzo[*e*][1,2]thiazine 1,1-Dioxide (2k).** Yield: 88%, mp = 65-67 °C,  $^1\text{H}$  NMR (400 MHz,  $\text{CDCl}_3$ ):  $\delta$  2.63-2.67 (m, 2H), 2.92-2.96 (m, 2H), 5.96 (s, 1H), 7.18-7.35 (m, 6H), 7.48-7.49 (m, 1H), 7.65 (s, 1H), 7.84 (d,  $J = 7.8$  Hz, 1H).  $^{13}\text{C}$  NMR (100 MHz,  $\text{CDCl}_3$ ):  $\delta$  33.8, 36.9, 105.5, 121.4, 126.6, 126.9, 127.1, 128.7, 128.8, 130.6, 132.4, 133.7, 140.4. HRMS Calculated for  $\text{C}_{16}\text{H}_{16}\text{NO}_2\text{S}$  ( $\text{M}+\text{H}$ ) $^+$  286.0902, found: 286.0900.

**3-Phenyl-2*H*-1 $\lambda^6$ -*m*-methyl-benzo[*e*][1,2]thiazine 1,1-Dioxide (2l).** Yield: 77%, mp = 207-209

°C,  $^1\text{H}$  NMR (400 MHz,  $\text{CDCl}_3$ ):  $\delta$  2.47 (s, 3H), 6.65 (s, 1H), 6.87 (s, 1H), 7.38-7.47 (m, 5H), 7.68-7.71 (m, 3H).  $^{13}\text{C}$  NMR (100 MHz,  $\text{CDCl}_3$ ):  $\delta$  21.6, 106.9, 121.5, 126.6, 127.8, 129.3, 130.3, 133.4, 138.5. HRMS Calculated for  $\text{C}_{15}\text{H}_{13}\text{NO}_2\text{SNa}$  ( $\text{M}+\text{Na}$ ) $^+$  294.0565, found: 294.0553.

**3-Fural-2H-1 $\lambda$ <sup>6</sup>-benzo[e][1,2]thiazine 1,1-Dioxide (2m).** Yield: 82%, mp = 181-183 °C,  $^1\text{H}$  NMR (400 MHz,  $\text{CDCl}_3$ ):  $\delta$  6.54 (s, 1H), 6.75 (s, 1H), 6.78 (d,  $J$  = 3.3 Hz, 1H), 7.19 (br, 1H), 7.45-7.48 (m, 2H), 7.53 (s, 1H), 7.57-7.61 (m, 1H), 7.89(d,  $J$  = 7.9 Hz, 1H).  $^{13}\text{C}$  NMR (100 MHz,  $\text{CDCl}_3$ ):  $\delta$  104.5, 109.7, 112.5, 121.7, 127.8, 127.9, 132.5, 144.4. HRMS Calculated for  $\text{C}_{12}\text{H}_{10}\text{NO}_3\text{S}$  ( $\text{M}+\text{H}$ ) $^+$  248.0381, found: 248.0382.

#### 4. Typical Procedure for Synthesis of Cyclic Enesulfonamides (4)

Cyclic enesulfonamides **4** were prepared from saccharin according to the procedures reported in the literature.<sup>9</sup>

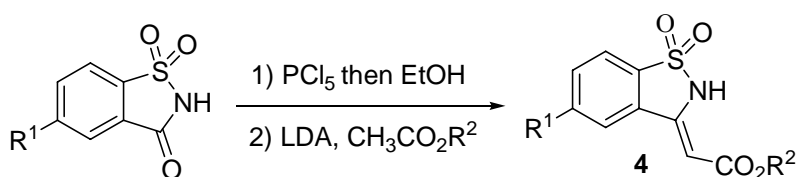

**3-Ethoxy-1,2-benzisothiazole 1,1-Dioxide:** In a dry 250-mL singleneck, round-bottomed flask equipped with magnetic stir bar and air condenser were placed 1.83 g (10 mmol) of saccharin and 2.71 g (13 mmol, 1.3 equiv) of  $\text{PCl}_5$ . The contents were gently heated until the reaction had subsided, at which time the temperature was raised to 175 °C for an additional 1.6 h. The  $\text{POCl}_3$  was removed by suction to give crude 3-chloro-1,2-benzisothiazole 1,1-dioxide, which was treated with 90 mL of absolute ethanol. After the reaction mixture was refluxed for 1 h, the solution was filtered, the filtrate was cooled in an ice bath, and the resulting solid was collected by filtration to give 3-ethoxy-1,2-benzisothiazole 1,1-dioxide 0.82 g (39%).

In a dry 100-mL two-necked round-bottom flask equipped with a magnetic stirring bar, argon, and syringe inlets was placed 422 mg (2.0 mmol) of 3-ethoxy-1,2-benzisothiazole 1,1-dioxide in 20 mL of dry THF. After the reaction mixture was cooled to -78 °C in a dry ice-acetone bath, 1.1 equiv of the appropriate organolithium reagent of the ethyl acetate was added via syringe. The reaction mixture was stirred for 4 h at this temperature, and quenched at -78 °C by addition of 40 mL of saturated  $\text{NH}_4\text{Cl}$  solution. The aqueous layer was extracted three times with EtOAc (3 X 20 mL), and the organic extracts were dried over anhydrous  $\text{Na}_2\text{SO}_4$ . After concentration in vacuo, the residue was finally purified by flash chromatography to give **4**.

**(1,1-Dioxo-1H-1 $\lambda$ <sup>6</sup>-benzo[d]isothiazol-3-yl)-acetic acid methyl ester (4a).** Yield: 67%, mp = 184-187 °C,  $^1\text{H}$  NMR (400 MHz,  $\text{CDCl}_3$ ):  $\delta$  3.82 (s, 3H), 5.71 (s, 1H), 7.72-7.77 (m, 3H), 7.88-7.90 (m, 1H), 10.1 (br, 1H).  $^{13}\text{C}$  NMR (100 MHz,  $\text{CDCl}_3$ ):  $\delta$  52.1, 88.4, 121.8, 122.6, 128.9, 132.9, 133.8, 143.8, 168.9.  $\text{C}_{10}\text{H}_9\text{NO}_4\text{SNa}$  ( $\text{M}+\text{Na}$ ) $^+$  262.0150, found: 262.0146.

**(1,1-Dioxo-1H-1 $\lambda$ <sup>6</sup>-benzo[d]isothiazol-3-yl)-acetic acid ethyl ester (4b)** (Known compound<sup>6</sup>). Yield: 67%, mp = 174-176 °C,  $^1\text{H}$  NMR (400 MHz,  $\text{CDCl}_3$ ):  $\delta$  1.32-1.36 (m, 3H), 4.24-4.29 (m, 2H), 5.71 (s, 1H), 7.72-7.76 (m, 3H), 7.88-7.90 (m, 1H).  $^{13}\text{C}$  NMR (100 MHz,  $\text{CDCl}_3$ ):  $\delta$  14.5, 61.1, 88.9, 121.8, 122.6, 128.9, 132.9, 133.8, 134.3, 143.7, 168.6.

**(1,1-Dioxo-1H-1 $\lambda$ <sup>6</sup>-benzo[d]isothiazol-3-yl)-acetic acid *t*-butyl ester (4c).** Yield: 67%, mp =

155-156 °C,  $^1\text{H}$  NMR (400 MHz,  $\text{CDCl}_3$ ):  $\delta$  1.53 (s, 9H), 5.64 (s, 1H), 7.69-7.73 (m, 3H), 7.87-7.88 (m, 1H).  $^{13}\text{C}$  NMR (100 MHz,  $\text{CDCl}_3$ ):  $\delta$  28.4, 81.8, 90.7, 121.8, 122.4, 129.1, 132.7, 133.7, 134.2, 142.9, 168.2. HRMS Calculated for  $\text{C}_{13}\text{H}_{15}\text{NO}_4\text{SNa}$  ( $\text{M}+\text{Na}$ ) $^+$  304.0619, found: 304.0630.

**(1,1-Dioxo-1*H*-1 $\lambda^6$ -benzo[d]isothiazol-3-yl)-acetic acid benzyl ester (4d).** Yield: 77%, mp = 169-171 °C,  $^1\text{H}$  NMR (400 MHz,  $\text{CDCl}_3$ ):  $\delta$  5.25 (s, 2H), 5.76 (s, 1H), 7.36-7.41 (m, 5H), 7.71-7.74 (m, 3H), 7.87-7.89 (m, 1H), 10.14 (br, 1H).  $^{13}\text{C}$  NMR (100 MHz,  $\text{CDCl}_3$ ):  $\delta$  66.7, 88.3, 121.7, 122.4, 128.4, 128.5, 128.7, 132.8, 133.7, 135.6, 143.9, 168.3. HRMS Calculated for  $\text{C}_{16}\text{H}_{13}\text{NO}_4\text{SNa}$  ( $\text{M}+\text{Na}$ ) $^+$  338.0463, found: 338.0465.

**(1,1-Dioxo-1*H*-1 $\lambda^6$ -*p*-methyl-benzo[d]isothiazol-3-yl)-acetic acid ethyl ester (4e).** Yield: 77%, mp = 215-217 °C,  $^1\text{H}$  NMR (400 MHz,  $\text{CDCl}_3$ ):  $\delta$  1.31-1.35 (m, 3H), 2.51 (s, 3H), 4.24-4.29 (m, 2H), 5.68 (s, 1H), 7.50-7.53 (m, 2H), 7.75 (d,  $J$  = 8.0 Hz, 1H), 10.08 (br, 1H).  $^{13}\text{C}$  NMR (100 MHz,  $\text{CDCl}_3$ ):  $\delta$  14.5, 22.1, 60.9, 88.5, 121.5, 122.7, 131.7, 133.8, 143.9, 144.9, 168.7. HRMS Calculated for  $\text{C}_{12}\text{H}_{13}\text{NO}_4\text{SNa}$  ( $\text{M}+\text{Na}$ ) $^+$  290.0463, found: 290.0450.

## 5. Typical Procedure for Asymmetric Hydrogenation of Enesulfonamides (2)

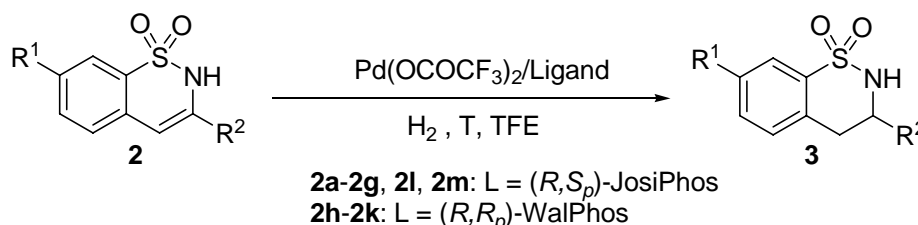

**Typical procedure for asymmetric hydrogenation of Cyclic Enamines:** Ligand (0.003 mmol) and  $\text{Pd}(\text{OCOCF}_3)_2$  (0.85 mg, 0.0025 mmol) were placed in a dried Schlenk tube under nitrogen atmosphere, and degassed anhydrous acetone was added. The mixture was stirred at rt for 1 h. The solvent was removed under vacuum to give the catalyst. This catalyst was taken into a glove box filled with nitrogen and dissolved in dry TFE (3.0 mL). To the enamine (0.125 mmol) was added this catalyst solution, and then the mixture was transferred to an autoclave. The autoclave was stirred under 70 °C (oil bath temperature was showed). After releasing of the hydrogen, the autoclave was opened and the reaction mixture was evaporated. Conversion was determined by  $^1\text{H}$  NMR analysis. The enantiomeric excess was determined by HPLC after purification on silica gel using petroleum ether and EtOAc. (Notes: for substrates **2a-2g**, **2l**, **2m**, (*R,S<sub>p</sub>*)-JosiPhos was used; substrates **2h-2k**, (*R,R<sub>p</sub>*)-WalPhos was used).

Racemates of **3** were prepared by the reduction of the corresponding enamines using Pd/C in MeOH or hydrogenation of corresponding substrates with racemic ligands.

**3,4-Dihydro-3-phenyl-2*H*-1 $\lambda^6$ -benzo[e][1,2]thiazine 1,1-dioxide (3a)** (known compound<sup>4</sup>). Yield: 96%, 98% ee (*R*),  $[\alpha]_{\text{D}}^{25} = +51.7$  (c 0.93,  $\text{CHCl}_3$ ); mp = 126-128 °C,  $^1\text{H}$  NMR (400 MHz,  $\text{CDCl}_3$ ):  $\delta$  3.16-3.27 (m, 2H), 4.90-4.97 (m, 1H), 5.03 (d,  $J$  = 10.4 Hz, 1H), 7.22-7.25 (m, 1H), 7.32-7.47 (m, 7H), 7.76 (d,  $J$  = 7.8 Hz, 2H).  $^{13}\text{C}$  NMR (100 MHz,  $\text{CDCl}_3$ ):  $\delta$  35.8, 56.9, 123.9, 126.4, 127.9, 128.6, 129.2, 129.6, 132.4, 135.2, 137.9, 139.8. HPLC (OD-H column,  $^i\text{PrOH}$ /hexane 30/70, 0.7 mL min $^{-1}$ , 254 nm):  $t_1$  = 16.1 min (minor),  $t_2$  = 19.9 min (major).

**3,4-Dihydro-3-phenyl-2*H*-1 $\lambda^6$ -*o*-methyl-benzo[e][1,2]thiazine 1,1-dioxide (3b).** Yield: 97%, 98% ee (*R*),  $[\alpha]_{\text{D}}^{24} = +11.4$  (c 0.77,  $\text{CHCl}_3$ ); mp = 182-183 °C,  $^1\text{H}$  NMR (400 MHz,  $\text{CDCl}_3$ ):  $\delta$  2.46 (s, 3H), 3.13 (dd,  $J$  = 16.6, 3.6 Hz, 1H), 3.34-3.41 (m, 1H), 4.67 (d,  $J$  = 10.4 Hz, 1H), 5.15-5.22 (m, 1H),

7.25-7.29 (m, 4H), 7.40-7.43 (m, 2H), 7.46-7.49 (m, 1H), 7.84 (d,  $J = 7.6$  Hz, 1H).  $^{13}\text{C}$  NMR (100 MHz,  $\text{CDCl}_3$ ):  $\delta$  19.4, 34.5, 53.6, 124.2, 125.2, 126.8, 128.1, 128.6, 129.7, 131.3, 132.4, 135.3, 136.4, 137.3. HRMS Calculated for  $\text{C}_{15}\text{H}_{15}\text{NO}_2\text{SNa}$  ( $\text{M}+\text{Na}$ ) $^+$  296.0721, found: 296.0728. HPLC (OD-H column,  $i\text{PrOH}$ /hexane 30/70,  $0.7\text{ mL min}^{-1}$ , 254 nm):  $t_1 = 12.0$  min (minor),  $t_2 = 14.8$  min (major).

**3,4-Dihydro-3-phenyl-2H-1 $\lambda^6$ -*m*-methyl-benzo[*e*][1,2]thiazine 1,1-dioxide (3c).** Yield: 97%, 97% ee (*R*),  $[\alpha]_D^{24} = +46.2$  (c 0.63,  $\text{CHCl}_3$ ); mp = 147-149 °C,  $^1\text{H}$  NMR (400 MHz,  $\text{CDCl}_3$ ):  $\delta$  2.39 (s, 3H), 3.21-3.24 (m, 2H), 4.86-4.94 (m, 2H), 7.16-7.17 (m, 1H), 7.21-7.32 (m, 4H), 7.35-7.39 (m, 1H), 7.44-7.47 (m, 1H), 7.79-7.81 (d,  $J = 0.7$  Hz, 1H).  $^{13}\text{C}$  NMR (100 MHz,  $\text{CDCl}_3$ ):  $\delta$  21.7, 35.8, 56.9, 123.3, 123.9, 127.2, 127.9, 129.1, 129.3, 129.6, 132.4, 135.2, 137.9, 138.9, 139.7. HRMS Calculated for  $\text{C}_{15}\text{H}_{15}\text{NO}_2\text{SNa}$  ( $\text{M}+\text{Na}$ ) $^+$  296.0721, found: 296.0717. HPLC (OD-H column,  $i\text{PrOH}$ /hexane 30/70,  $0.7\text{ mL min}^{-1}$ , 254 nm):  $t_1 = 11.3$  min (minor),  $t_2 = 13.4$  min (major).

**3,4-Dihydro-3-phenyl-2H-1 $\lambda^6$ -*p*-methyl-benzo[*e*][1,2]thiazine 1,1-dioxide (3d).** Yield: 99%, 97% ee (*R*),  $[\alpha]_D^{24} = +18.7$  (c 0.47,  $\text{CHCl}_3$ ); mp = 151-152 °C,  $^1\text{H}$  NMR (400 MHz,  $\text{CDCl}_3$ ):  $\delta$  2.37 (s, 3H), 3.24 (d,  $J = 6.6$  Hz, 2H), 4.70 (d,  $J = 9.8$  Hz, 1H), 4.92-4.96 (m, 1H), 7.21-7.33 (m, 5H), 7.39-7.43 (m, 1H), 7.47-7.50 (m, 1H), 7.85 (d,  $J = 7.5$  Hz, 1H).  $^{13}\text{C}$  NMR (100 MHz,  $\text{CDCl}_3$ ):  $\delta$  21.3, 35.8, 56.7, 123.9, 126.3, 128.0, 129.7, 129.8, 132.4. HRMS Calculated for  $\text{C}_{15}\text{H}_{15}\text{NO}_2\text{SNa}$  ( $\text{M}+\text{Na}$ ) $^+$  296.0721, found: 296.0711. HPLC (OD-H column,  $i\text{PrOH}$ /hexane 30/70,  $0.7\text{ mL min}^{-1}$ , 254 nm):  $t_1 = 13.7$  min (minor),  $t_2 = 18.4$  min (major).

**3,4-Dihydro-3-phenyl-2H-1 $\lambda^6$ -*p*-methoxyl-benzo[*e*][1,2]thiazine 1,1-dioxide (3e)** (known compound<sup>3</sup>). Yield: 97%, 95% ee (*R*),  $[\alpha]_D^{24} = +28.6$  (c 0.77,  $\text{CHCl}_3$ ); mp = 123-125 °C,  $^1\text{H}$  NMR (400 MHz,  $\text{CDCl}_3$ ):  $\delta$  3.19-3.23 (m, 2H), 3.82 (s, 3H), 4.84-4.87 (m, 2H), 6.93 (d,  $J = 8.4$  Hz, 2H), 7.24 (m, 1H), 7.34-7.37 (m, 3H), 7.44-7.46 (m, 1H), 7.79-7.81 (d,  $J = 7.6$  Hz, 1H).  $^{13}\text{C}$  NMR (100 MHz,  $\text{CDCl}_3$ ):  $\delta$  35.8, 55.6, 56.5, 114.5, 123.9, 127.7, 127.9, 129.7, 131.9, 132.4, 135.2, 137.9, 159.7. HPLC (OD-H column,  $i\text{PrOH}$ /hexane 30/70,  $0.7\text{ mL min}^{-1}$ , 254 nm):  $t_1 = 14.9$  min (minor),  $t_2 = 20.6$  min (major).

**3,4-Dihydro-3-phenyl-2H-1 $\lambda^6$ -*p*-fluoro-benzo[*e*][1,2]thiazine 1,1-dioxide (3f)** (known compound<sup>3</sup>). Yield: 99%, 98% ee (*R*),  $[\alpha]_D^{24} = +59.2$  (c 0.50,  $\text{CHCl}_3$ ); mp = 141-143 °C,  $^1\text{H}$  NMR (400 MHz,  $\text{CDCl}_3$ ):  $\delta$  3.17-3.27 (m, 2H), 4.88-4.95 (m, 1H), 5.02 (d,  $J = 10.3$  Hz, 2H), 7.07-7.12 (m, 2H), 7.24-7.26 (m, 1H), 7.35-7.48 (m, 4H), 7.77-7.79 (d,  $J = 7.8$  Hz, 1H).  $^{13}\text{C}$  NMR (100 MHz,  $\text{CDCl}_3$ ):  $\delta$  35.7, 56.4, 115.9, 116.2, 123.8, 128.1, 128.2, 128.3, 129.6, 132.5, 134.9, 135.7, 137.9, 163.9. HPLC (OD-H column,  $i\text{PrOH}$ /hexane 30/70,  $0.7\text{ mL min}^{-1}$ , 254 nm):  $t_1 = 13.1$  min (minor),  $t_2 = 17.2$  min (major).

**3,4-Dihydro-3-phenyl-2H-1 $\lambda^6$ -*p*-chloro-benzo[*e*][1,2]thiazine 1,1-dioxide (3g)** (known compound<sup>3</sup>). Yield: 97%, 98% ee (*R*),  $[\alpha]_D^{24} = +26.9$  (c 1.00,  $\text{CHCl}_3$ ); mp = 148-150 °C,  $^1\text{H}$  NMR (400 MHz,  $\text{CDCl}_3$ ):  $\delta$  3.23-3.29 (m, 2H), 4.78 (br, 1H), 4.90-4.94 (m, 1H), 7.29-7.31 (m, 1H), 7.38-7.44 (m, 5H), 7.48-7.52 (m, 1H), 7.83-7.86 (m, 1H).  $^{13}\text{C}$  NMR (100 MHz,  $\text{CDCl}_3$ ):  $\delta$  35.6, 56.5, 123.9, 126.4, 127.8, 128.2, 128.6, 129.2, 129.4, 129.6, 132.6. HPLC (OD-H column,  $i\text{PrOH}$ /hexane 30/70,  $0.7\text{ mL min}^{-1}$ , 254 nm):  $t_1 = 12.7$  min (minor),  $t_2 = 16.4$  min (major).

**3-Methyl-3,4-dihydro-2H-benzo[*e*][1,2]thiazine 1,1-dioxide (3h)** (known compound<sup>7</sup>). Yield: 99%, 98% ee (*R*),  $[\alpha]_D^{24} = -69.4$  (c 0.53,  $\text{CHCl}_3$ ); mp = 181-183 °C,  $^1\text{H}$  NMR (400 MHz,  $\text{CDCl}_3$ ):  $\delta$  1.40 (d,  $J = 6.5$  Hz, 3H), 2.77-2.84 (m, 1H), 2.97 (dd,  $J = 17.1, 3.2$  Hz, 1H), 4.02-4.12 (m, 1H), 4.28 (br, 1H), 7.20-7.22 (m, 1H), 7.36-7.39 (m, 1H), 7.43-7.47 (m, 1H), 7.90 (d,  $J = 7.8$  Hz, 1H).  $^{13}\text{C}$  NMR (100 MHz,  $\text{CDCl}_3$ ):  $\delta$  22.0, 36.5, 49.7, 124.3, 127.9, 129.6, 132.3. HPLC (OD-H column,  $i\text{PrOH}$ /hexane 30/70,  $0.7\text{ mL min}^{-1}$ , 254 nm):  $t_1 = 8.3$  min (major),  $t_2 = 14.4$  min (minor).

**3-Propyl-3,4-dihydro-2H-benzo[e][1,2]thiazine 1,1-dioxide (3i).** Yield: 92%, 96% ee (*R*),  $[\alpha]_D^{24} = -60.4$  (c 0.87, CHCl<sub>3</sub>); mp = 80-82 °C, <sup>1</sup>H NMR (400 MHz, CDCl<sub>3</sub>): δ 0.96-0.99 (m, 3H), 1.49-1.65 (m, 4H), 2.71-2.79 (m, 1H), 2.90 (dd, *J* = 17.1, 3.9 Hz, 1H), 3.85-3.90 (m, 1H), 4.45 (br, 1H), 7.16 (d, *J* = 7.6 Hz, 1H), 7.29-7.41 (m, 2H), 7.74 (d, *J* = 7.8 Hz, 1H). <sup>13</sup>C NMR (100 MHz, CDCl<sub>3</sub>): δ 13.9, 18.8, 34.8, 38.1, 53.4, 124.2, 127.8, 129.7, 132.2, 135.5, 137.7. HRMS Calculated for C<sub>11</sub>H<sub>15</sub>NO<sub>2</sub>SNa (M+Na)<sup>+</sup> 248.0721, found: 248.0714. HPLC (OD-H column, *i*PrOH/hexane 30/70, 0.7 mL min<sup>-1</sup>, 254 nm): t<sub>1</sub> = 8.9 min (major), t<sub>2</sub> = 18.6 min (minor).

**3-Amyl-3,4-dihydro-2H-benzo[e][1,2]thiazine 1,1-dioxide (3j).** Yield: 90%, 90% ee (*R*),  $[\alpha]_D^{24} = -30.52$  (c 0.83, CHCl<sub>3</sub>); mp = 93-94 °C, <sup>1</sup>H NMR (400 MHz, CDCl<sub>3</sub>): δ 0.89-0.93 (m, 3H), 1.32-1.37 (m, 4H), 1.58-1.62 (m, 2H), 1.63-1.66 (m, 2H), 2.75-2.83 (m, 1H), 2.95 (dd, *J* = 17.0, 3.9 Hz, 1H), 3.89 (m, 1H), 4.25 (d, *J* = 11.5 Hz, 1H), 7.19-7.22 (d, *J* = 7.6 Hz, 1H), 7.34-7.38 (m, 1H), 7.41-7.45 (m, 1H), 7.80 (d, *J* = 7.8 Hz, 1H). <sup>13</sup>C NMR (100 MHz, CDCl<sub>3</sub>): δ 14.2, 22.7, 25.2, 31.6, 34.9, 36.2, 53.8, 124.3, 127.9, 129.7, 132.2, 135.4, 137.8. HRMS Calculated for C<sub>13</sub>H<sub>19</sub>NO<sub>2</sub>SNa (M+Na)<sup>+</sup> 276.1034, found: 276.1023. HPLC (AD-H column, *i*PrOH/hexane 30/70, 0.7 mL min<sup>-1</sup>, 254 nm): t<sub>1</sub> = 7.0 min (major), t<sub>2</sub> = 9.1 min (minor).

**3-2-Phenylethyl-3,4-dihydro-2H-benzo[e][1,2]thiazine 1,1-dioxide (3k).** Yield: 75%, 96% ee (*R*),  $[\alpha]_D^{24} = -5.74$  (c 0.73, CHCl<sub>3</sub>); mp = 65-67 °C, <sup>1</sup>H NMR (400 MHz, CDCl<sub>3</sub>): δ 1.92-1.98 (m, 2H), 2.79-2.95 (m, 4H), 3.85-3.88 (m, 1H), 4.37 (br, 1H), 7.17-7.26 (m, 4H), 7.28-7.39 (m, 3H), 7.40-7.42 (m, 1H), 7.79 (d, *J* = 7.8 Hz, 1H). <sup>13</sup>C NMR (100 MHz, CDCl<sub>3</sub>): δ 31.7, 34.9, 37.9, 53.1, 124.3, 126.5, 127.9, 128.8, 129.7, 132.3, 135.2, 137.8, 140.9. HRMS Calculated for C<sub>16</sub>H<sub>17</sub>NO<sub>2</sub>SNa (M+Na)<sup>+</sup> 310.0878, found: 310.0868. HPLC (OD-H column, *i*PrOH/hexane 30/70, 0.7 mL min<sup>-1</sup>, 254 nm): t<sub>1</sub> = 13.6 min (major), t<sub>2</sub> = 32.5 min (minor).

**3-Phenyl-3,4-dihydro-2H-*m*-methyl-benzo[e][1,2]thiazine 1,1-dioxide (3l).** Yield: 97%, 96% ee (*R*),  $[\alpha]_D^{24} = +49.3$  (c 0.60, CHCl<sub>3</sub>); mp = 197-198 °C, <sup>1</sup>H NMR (400 MHz, CDCl<sub>3</sub>): δ 2.38 (s, 3H), 3.19 (d, *J* = 7.8 Hz, 2H), 4.79 (d, *J* = 10.4 Hz, 1H), 4.93-4.97 (m, 1H), 7.14-7.16 (d, *J* = 7.9 Hz, 1H), 7.25-7.28 (m, 1H), 7.34-7.45 (m, 5H), 7.64 (s, 1H). <sup>13</sup>C NMR (100 MHz, CDCl<sub>3</sub>): δ 21.3, 35.5, 57.0, 124.1, 126.4, 128.6, 129.2, 129.5, 132.0, 133.3, 137.6, 138.2, 139.8. HRMS Calculated for C<sub>15</sub>H<sub>15</sub>NO<sub>2</sub>SNa (M+Na)<sup>+</sup> 296.0721, found: 296.0721. HPLC (OD-H column, *i*PrOH/hexane 30/70, 0.7 mL min<sup>-1</sup>, 254 nm): t<sub>1</sub> = 12.6 min (minor), t<sub>2</sub> = 16.0 min (major).

**3-Fural-3,4-dihydro-2H-*m*-methyl-benzo[e][1,2]thiazine 1,1-dioxide (3m).** Yield: 99%, 81% ee (*R*),  $[\alpha]_D^{15} = +138.6$  (c 0.20, CHCl<sub>3</sub>); mp = 109-111 °C, <sup>1</sup>H NMR (400 MHz, CDCl<sub>3</sub>): δ 3.24 (dd, *J* = 17.1, 4.2 Hz, 1H), 3.32-3.40 (m, 1H), 4.77 (d, *J* = 11.1 Hz, 1H), 5.09-5.15 (m, 1H), 6.39 (m, 2H), 7.26-7.28 (m, 1H), 7.38-7.43 (m, 2H), 7.46-7.49 (m, 1H), 7.82 (d, *J* = 7.6 Hz, 1H). <sup>13</sup>C NMR (100 MHz, CDCl<sub>3</sub>): δ 33.2, 51.1, 107.4, 110.8, 124.3, 128.2, 129.8, 132.5, 134.4, 137.7, 143.0, 151.7. HRMS Calculated for C<sub>12</sub>H<sub>11</sub>NO<sub>3</sub>SNa (M+Na)<sup>+</sup> 272.0357, found: 272.0361. HPLC (OD-H column, *i*PrOH/hexane 30/70, 0.7 mL min<sup>-1</sup>, 254 nm): t<sub>1</sub> = 11.9 min (minor), t<sub>2</sub> = 14.0 min (major).



## 6. Typical Procedure for Asymmetric Hydrogenation of Enesulfonamides (4)

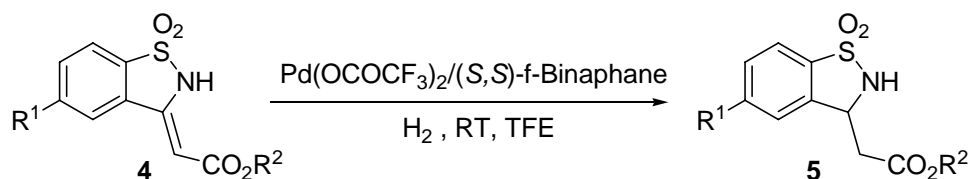

**Typical procedure for asymmetric hydrogenation of Cyclic Enamines:** (*S,S*)-f-Binaphane (2.4 mg, 0.003 mmol) and Pd(OCOCF<sub>3</sub>)<sub>2</sub> (0.85 mg, 0.0025 mmol) were placed in a dried Schlenk tube under nitrogen atmosphere, and degassed anhydrous acetone was added. The mixture was stirred at rt for 1 h. The solvent was removed under vacuum to give the catalyst. This catalyst was taken into a glove box filled with nitrogen and dissolved in dry TFE (3.0 mL). To the enamine (0.125 mmol) was added this catalyst solution, and then the mixture was transferred to an autoclave. The autoclave was stirred under room temperature. After release of the hydrogen, the autoclave was opened and the reaction mixture was evaporated. Conversion was determined by <sup>1</sup>H NMR analysis. The enantiomeric excess was determined by HPLC after purification on silica gel using petroleum ether and EtOAc.

Racemates of **5** were prepared by the reduction of the corresponding enamines using Pd/C in MeOH or hydrogenation of corresponding substrates with racemic ligands.

**(1,1-Dioxo-2,3-dihydro-1*H*-1λ<sup>6</sup>-benzo[d]isothiazol-3-yl)-acetic acid methyl ester (5a)** (known compound<sup>8</sup>). Yield: 97%, 86% ee (*S*), [α]<sub>D</sub><sup>24</sup> = - 112.5 (c 0.7, CHCl<sub>3</sub>), mp = 139-141 °C, <sup>1</sup>H NMR (400 MHz, CDCl<sub>3</sub>): δ 2.77-2.84 (m, 1H), 2.97-3.02 (dd, *J* = 17.0, 3.4 Hz, 1H), 2.97 (s, 3H), 5.09-5.13 (m, 1H), 5.56 (br, 1H), 7.40 (d, *J* = 7.7 Hz, 1H), 7.55-7.65 (m, 2H), 7.81 (d, *J* = 7.3 Hz, 1H). <sup>13</sup>C NMR (100 MHz, CDCl<sub>3</sub>): δ 40.2, 52.4, 53.6, 121.6, 123.9, 129.8, 133.3, 138.0, 171.3. HPLC (OD-H column, <sup>i</sup>PrOH/hexane 30/70, 0.7 mL min<sup>-1</sup>, 254 nm): t<sub>1</sub> = 12.3 min (major), t<sub>2</sub> = 15.5 min (minor).

**(1,1-Dioxo-2,3-dihydro-1*H*-1λ<sup>6</sup>-benzo[d]isothiazol-3-yl)-acetic acid ethyl ester (5b)** (known compound<sup>8</sup>). Yield: 97%, 92% ee (*S*), [α]<sub>D</sub><sup>24</sup> = - 112.5 (c 0.7, CHCl<sub>3</sub>); mp = 116-117 °C, <sup>1</sup>H NMR (400 MHz, CDCl<sub>3</sub>): δ 1.25-1.30 (m, 3H), 2.80-2.83 (m, 1H), 2.97 (m, 1H), 4.19-4.23 (m, 2H), 5.12 (m, 1H), 5.43 (br, 1H), 7.38-7.40 (m, 1H), 7.57-7.65 (m, 2H), 7.81 (d, *J* = 7.7 Hz, 1H). <sup>13</sup>C NMR (100 MHz, CDCl<sub>3</sub>): δ 14.3, 40.5, 53.8, 61.7, 121.8, 124.1, 129.9, 133.5, 138.2. HPLC (OJ-H column, <sup>i</sup>PrOH/hexane 30/70, 0.8 mL min<sup>-1</sup>, 254 nm): t<sub>1</sub> = 22.1 min (minor), t<sub>2</sub> = 24.2 min (major).

**(1,1-Dioxo-2,3-dihydro-1*H*-1λ<sup>6</sup>-benzo[d]isothiazol-3-yl)-acetic acid *t*-butyl ester (5c).** Yield: 97%, 96% ee (*R*), [α]<sub>D</sub><sup>24</sup> = + 1.17 (c 0.84, CHCl<sub>3</sub>); mp = 114-115 °C, <sup>1</sup>H NMR (400 MHz, CDCl<sub>3</sub>): δ 1.46 (s, 9H), 2.69-2.76 (m, 1H), 2.92 (dd, *J* = 16.8, 3.4 Hz, 1H), 5.02-5.07 (m, 1H), 5.47 (br, 1H), 7.38 (d, *J* = 7.6 Hz, 1H), 7.54-7.58 (m, 1H), 7.62-7.66 (m, 1H), 7.79-7.82 (d, *J* = 7.6 Hz, 1H). <sup>13</sup>C NMR (100 MHz, CDCl<sub>3</sub>): δ 28.2, 41.2, 53.9, 82.6, 121.7, 124.1, 129.9, 133.4, 138.5, 163.2, 170.1. HRMS Calculated for C<sub>13</sub>H<sub>17</sub>NO<sub>4</sub>SNa (M+Na)<sup>+</sup> 306.0776, found: 306.0772. HPLC (OD-H column, <sup>i</sup>PrOH/hexane 30/70, 0.7 mL min<sup>-1</sup>, 254 nm): t<sub>1</sub> = 9.1 min (major), t<sub>2</sub> = 10.0 min (minor).

**(1,1-Dioxo-2,3-dihydro-1*H*-1λ<sup>6</sup>-benzo[d]isothiazol-3-yl)-acetic acid benzyl ester (5d).** Yield: 97%, 87% ee (*S*), [α]<sub>D</sub><sup>24</sup> = - 48.95 (c 0.84, CHCl<sub>3</sub>); mp = 132-133 °C, <sup>1</sup>H NMR (400 MHz, CDCl<sub>3</sub>): δ 2.82-2.88 (m, 1H), 3.04 (m, 1H), 5.09-5.29 (m, 3H), 5.45 (br, 1H), 7.34-7.38 (m, 6H), 7.54-7.62 (m, 2H), 7.80 (d, *J* = 7.6 Hz, 1H). <sup>13</sup>C NMR (100 MHz, CDCl<sub>3</sub>): δ 40.4, 53.6, 67.3, 121.7, 123.9, 128.5, 128.6, 128.7, 129.8, 133.3, 137.9, 170.6. HRMS Calculated for C<sub>16</sub>H<sub>15</sub>NO<sub>4</sub>SNa (M+Na)<sup>+</sup> 340.0619, found: 340.0633. HPLC (OD-H column, <sup>i</sup>PrOH/hexane 30/70, 0.7 mL min<sup>-1</sup>, 254 nm): t<sub>1</sub> = 17.8 min (major), t<sub>2</sub> = 24.6 min (minor).

**(1,1-Dioxo-2,3-dihydro-1*H*-1λ<sup>6</sup>-*p*-methyl-benzo[*d*]isothiazol-3-yl)-acetic acid ethyl ester (5e).**  
Yield: 99%, 87% ee (*S*),  $[\alpha]_D^{24} = -105.79$  (c 0.42, CHCl<sub>3</sub>); mp = 161-162 °C, <sup>1</sup>H NMR (400 MHz, CDCl<sub>3</sub>): δ 1.25-1.30 (m, 3H), 2.46 (s, 3H), 2.76 (dd, *J* = 16.9, 10.0 Hz, 1H), 2.95 (dd, *J* = 16.9, 3.4 Hz, 1H), 4.19-4.25 (m, 2H), 5.03-5.07 (m, 1H), 5.51 (br, 1H), 7.17 (s, 1H), 7.35 (d, *J* = 8.0 Hz, 1H), 7.67 (d, *J* = 8.0 Hz, 1H). <sup>13</sup>C NMR (100 MHz, CDCl<sub>3</sub>): δ 14.4, 22.0, 40.6, 53.7, 61.7, 121.6, 124.4, 130.9, 138.6, 144.5, 170.9. HRMS Calculated for C<sub>12</sub>H<sub>15</sub>NO<sub>4</sub>SNa (M+Na)<sup>+</sup> 292.0619, found: 292.0609. HPLC (OD-H column, <sup>i</sup>PrOH/hexane 30/70, 0.7 mL min<sup>-1</sup>, 254 nm): t<sub>1</sub> = 32.7 min (minor), t<sub>2</sub> = 35.0 min (major).

## 7. Isotopic Labeling Experiments Using D<sub>2</sub> and CF<sub>3</sub>CH<sub>2</sub>OD

### Deuteration with D<sub>2</sub>:

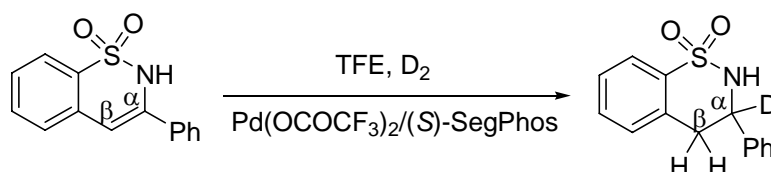

(*S*)-SegPhos (3.7 mg, 0.006 mmol) and Pd(OCOCF<sub>3</sub>)<sub>2</sub> (1.7 mg, 0.005 mmol) were placed in a dried Schlenk tube under nitrogen atmosphere, and degassed anhydrous acetone was added. The mixture was stirred at rt for 1 h. The solvent was removed under vacuum to give the catalyst. This catalyst was taken into a glove box filled with nitrogen and dissolved in dry TFE (3.0 mL). To the enesulfonamide **3a** (64 mg, 0.25 mmol) was added this catalyst solution, and then the mixture was transferred to an autoclave. The autoclave was filled with D<sub>2</sub> of 10 atm, and stirred under 70 °C (oil bath temperature was showed) for 24 h. The product was obtained after purification on silica gel using petroleum ether and EtOAc. <sup>1</sup>H NMR analysis of the crude hydrogenated product showed that one deuterium atom was incorporated to the α-position, and deuterium at the β-position was not observed, which suggested that the hydrogenation of enesulfonamides was conducted *via* *N*-sulfonylimine intermediates (Figure 1).

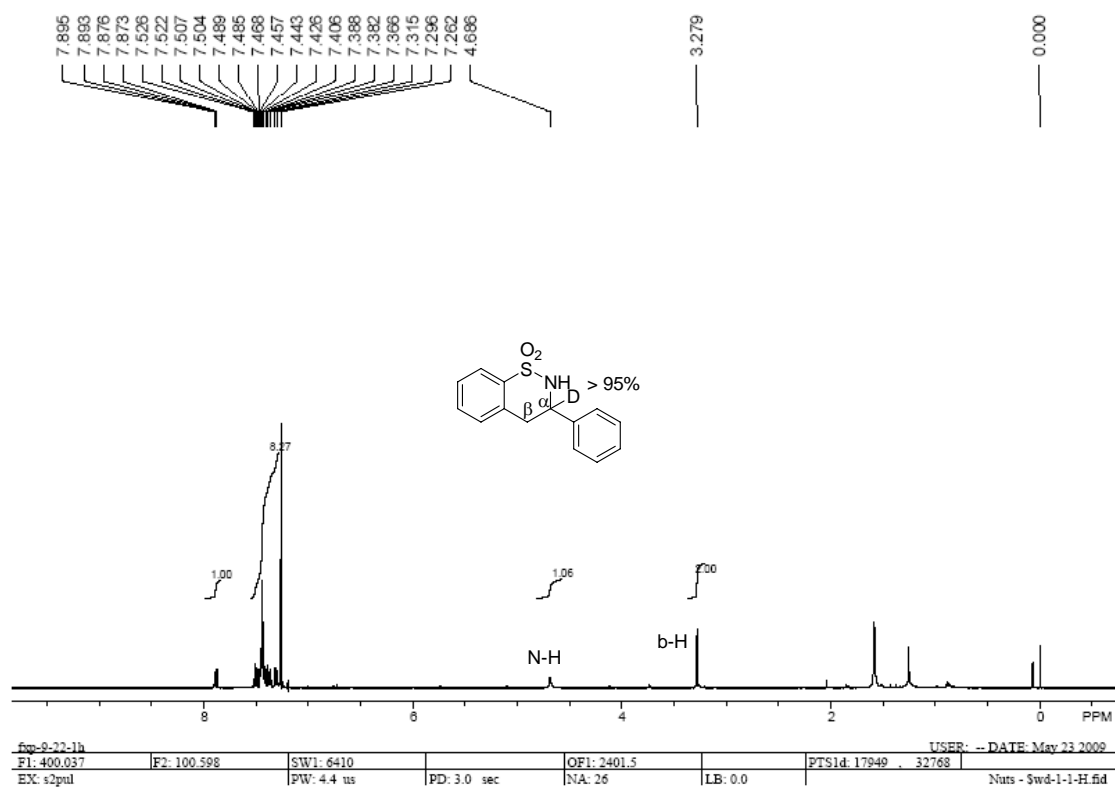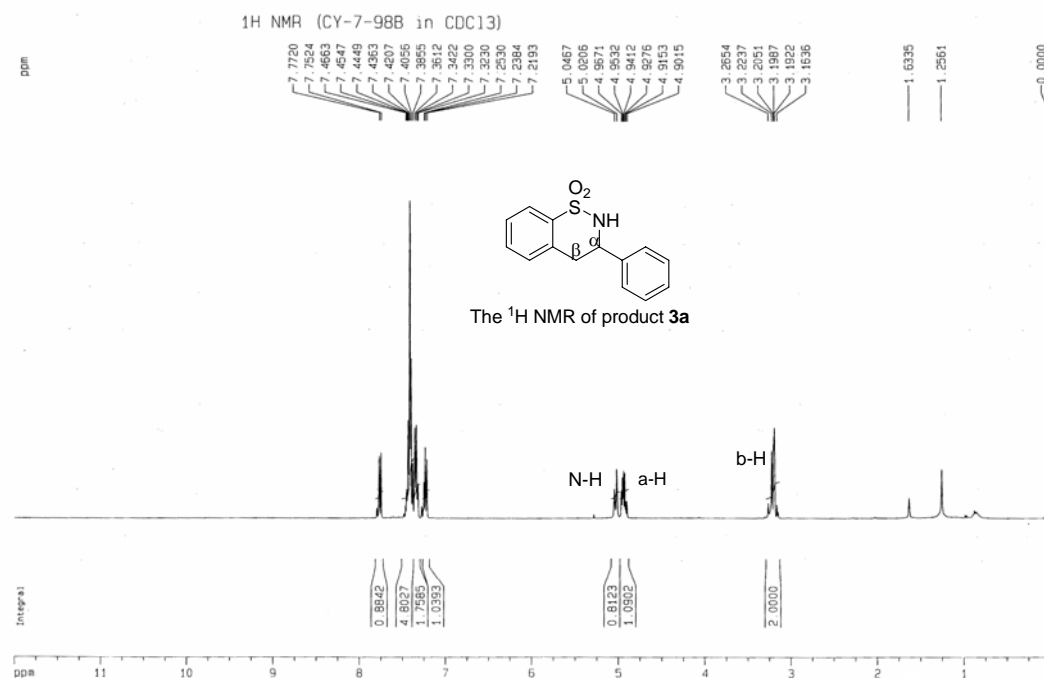

Figure 1

Deuteration with CF<sub>3</sub>CH<sub>2</sub>OD:

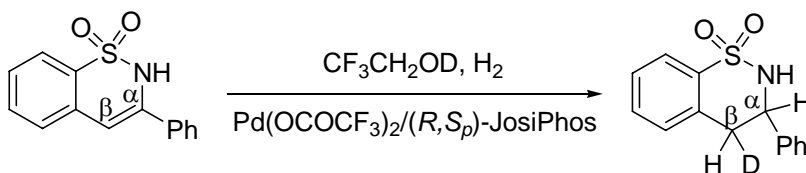

For the full conversion experiment: (*R,S<sub>p</sub>*)-JosiPhos (1.9 mg, 0.003 mmol) and Pd(OCOCF<sub>3</sub>)<sub>2</sub> (0.9 mg, 0.0025 mmol) were placed in a dried Schlenk tube under nitrogen atmosphere, and degassed anhydrous acetone was added. The mixture was stirred at rt for 1 h. The solvent was removed under vacuum to give the catalyst. This catalyst was taken into a glove box filled with nitrogen and dissolved in dry CF<sub>3</sub>CH<sub>2</sub>OD (3.0 mL). To the enesulfonamide **3a** (32 mg, 0.125 mmol) was added this catalyst solution, and then the mixture was transferred to an autoclave. The autoclave was filled with H<sub>2</sub> of 28 atm, and stirred under 70 °C (oil bath temperature was showed) for 18 h. The product and the starting material were obtained after purification on silica gel using petroleum ether and EtOAc. <sup>1</sup>H NMR analysis of the crude hydrogenated product showed that one deuterium atom was incorporated to the β-position.

For the incomplete conversion experiment: Under the above conditions with H<sub>2</sub> pressure was 1 atm and stirred under 65 °C (oil bath temperature was showed) for 3 h. <sup>1</sup>H NMR analysis of the crude hydrogenated product showed that one deuterium atom was incorporated to the β-position, while no deuterium atom was observed in the recovered starting materials (Figure 2).

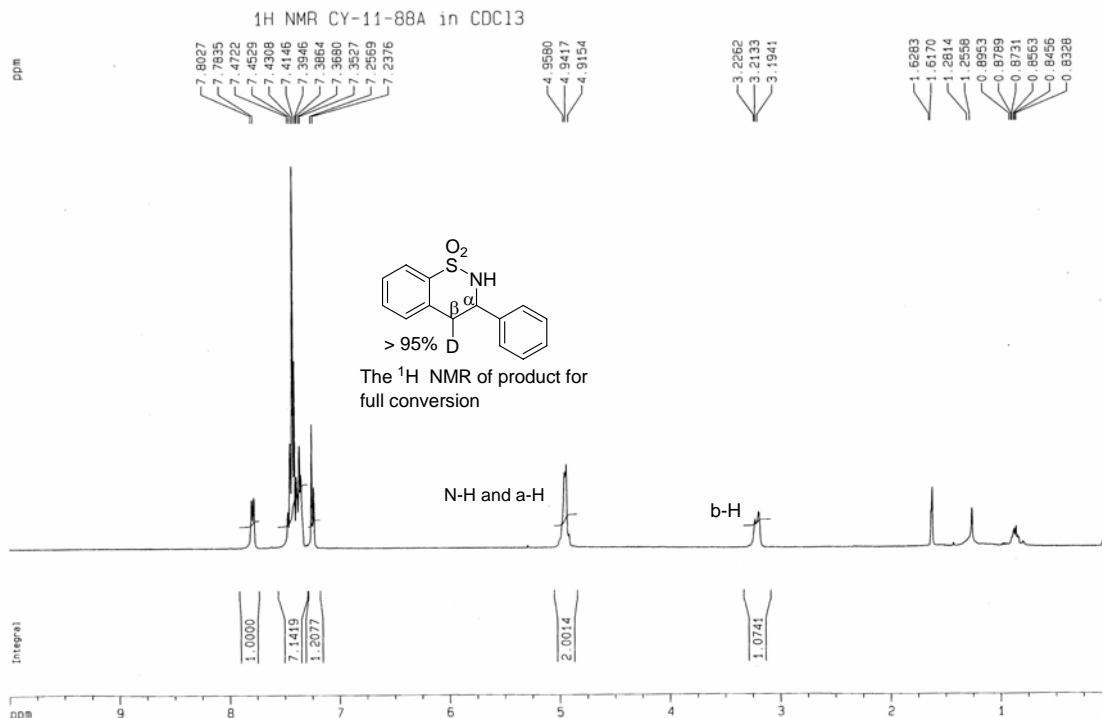

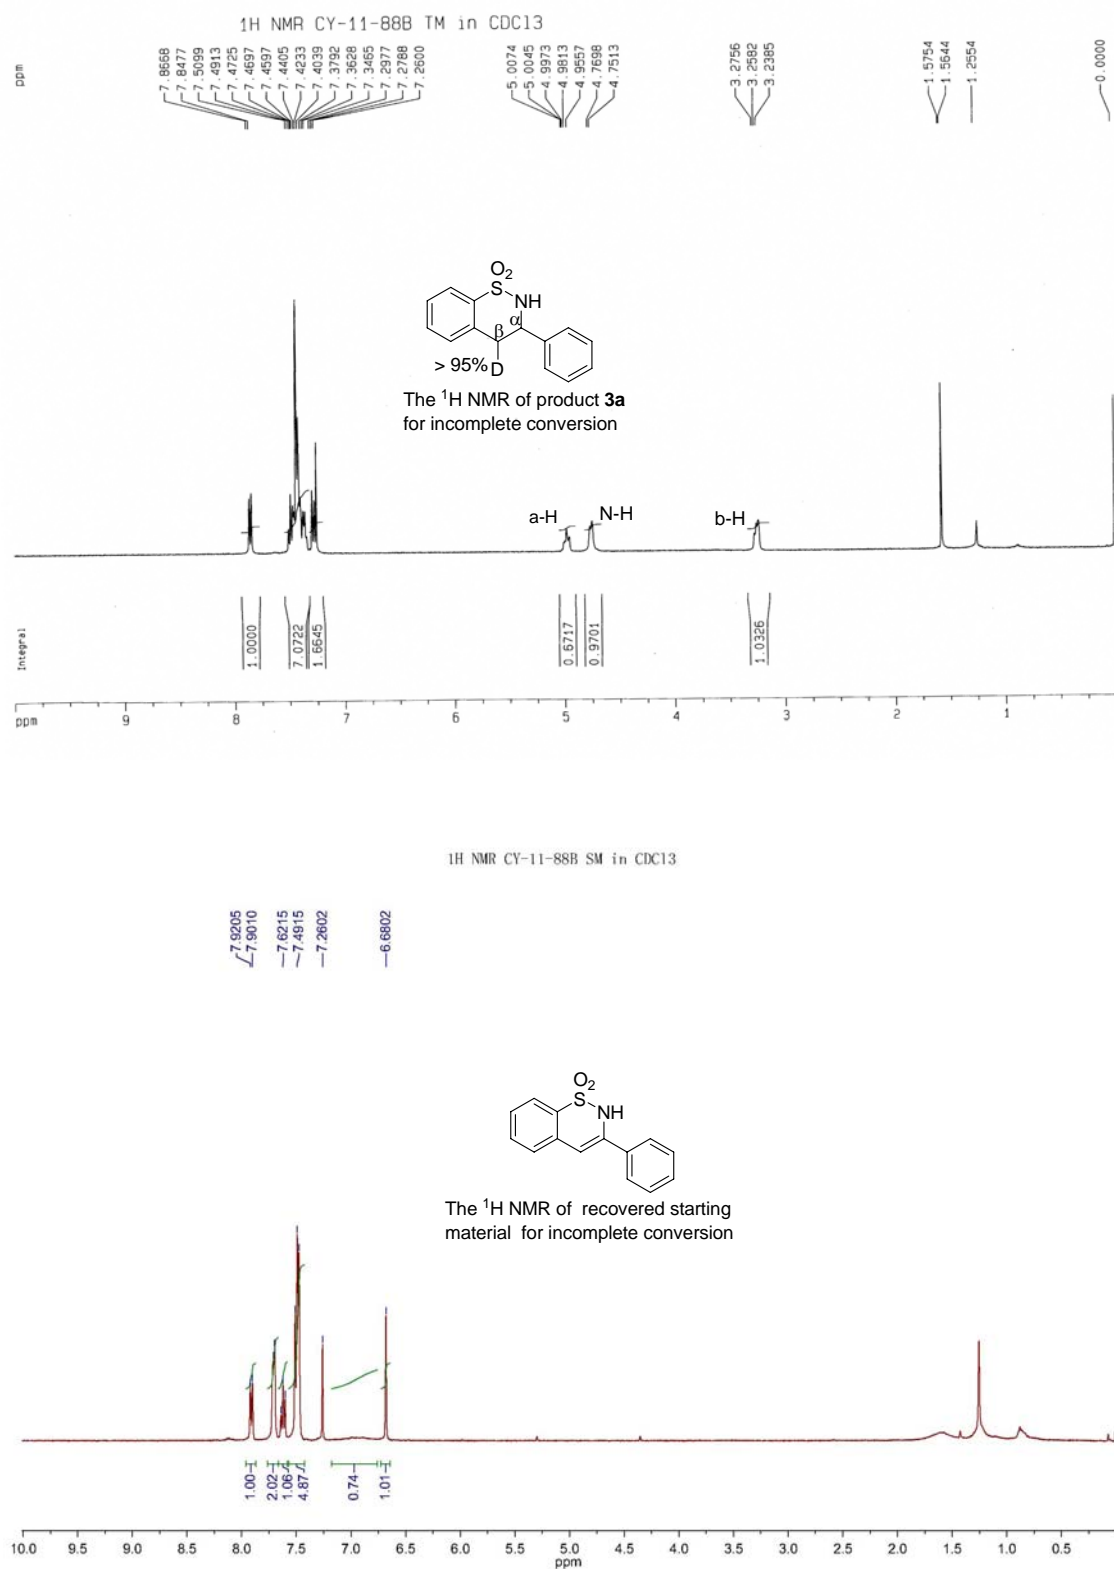

**Figure 2**

The above experiments confirmed that the hydrogenation of enesulfonamides was conducted *via* *N*-sulfonylimine intermediates, and the tautomerization process of enesulfonamides to *N*-sulfonylimine intermediates was slower than the hydrogenation.

## 8. Determination of Absolute Configuration of Hydrogenated Product 3.

Recrystallization from DCM/hexane gave sulfonamide **3c** (>99% ee) as a colorless crystal, and its absolute configuration was assigned as (*R*)-**3c** by X-ray diffraction analysis.

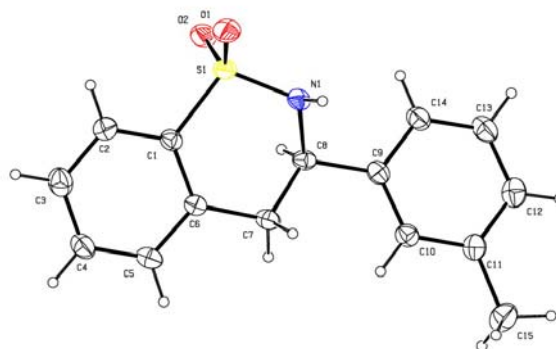

Crystal data and structure refinement for **3c**.

|                                   |                                                                                                                |
|-----------------------------------|----------------------------------------------------------------------------------------------------------------|
| Identification code               | p212121                                                                                                        |
| Empirical formula                 | C <sub>15</sub> H <sub>15</sub> N O <sub>2</sub> S                                                             |
| Formula weight                    | 273.34                                                                                                         |
| Temperature                       | 296(2) K                                                                                                       |
| Wavelength                        | 0.71073 Å                                                                                                      |
| Crystal system, space group       | Orthorhombic, P2(1)2(1)2(1)                                                                                    |
| Unit cell dimensions              | a = 4.972(4) Å    alpha = 90 deg.<br>b = 13.870(10) Å    beta = 90 deg.<br>c = 19.934(14) Å    gamma = 90 deg. |
| Volume                            | 1374.5(16) Å <sup>3</sup>                                                                                      |
| Z, Calculated density             | 4, 1.321 Mg/m <sup>3</sup>                                                                                     |
| Absorption coefficient            | 0.232 mm <sup>-1</sup>                                                                                         |
| F(000)                            | 576                                                                                                            |
| Crystal size                      | 0.21 x 0.18 x 0.15 mm                                                                                          |
| Theta range for data collection   | 2.52 to 25.99 deg.                                                                                             |
| Limiting indices                  | -6 <= h <= 6, -17 <= k <= 14, -20 <= l <= 24                                                                   |
| Reflections collected / unique    | 6867 / 2682 [R(int) = 0.0773]                                                                                  |
| Completeness to theta = 25.99     | 99.4 %                                                                                                         |
| Absorption correction             | None                                                                                                           |
| Max. and min. transmission        | 0.9660 and 0.9528                                                                                              |
| Refinement method                 | Full-matrix least-squares on F <sup>2</sup>                                                                    |
| Data / restraints / parameters    | 2682 / 0 / 177                                                                                                 |
| Goodness-of-fit on F <sup>2</sup> | 1.015                                                                                                          |
| Final R indices [I > 2sigma(I)]   | R1 = 0.0588, wR2 = 0.1139                                                                                      |
| R indices (all data)              | R1 = 0.0907, wR2 = 0.1275                                                                                      |
| Absolute structure parameter      | -0.07(14)                                                                                                      |
| Largest diff. peak and hole       | 0.184 and -0.228 e.Å <sup>-3</sup>                                                                             |

Bond lengths [Å] and angles [deg] for **3c**.

|                |          |
|----------------|----------|
| C(1)-C(2)      | 1.366(5) |
| C(1)-C(6)      | 1.400(4) |
| C(1)-S(1)      | 1.763(4) |
| C(2)-C(3)      | 1.383(5) |
| C(2)-H(2)      | 0.9300   |
| C(3)-C(4)      | 1.372(6) |
| C(3)-H(3)      | 0.9300   |
| C(4)-C(5)      | 1.373(5) |
| C(4)-H(4)      | 0.9300   |
| C(5)-C(6)      | 1.393(5) |
| C(5)-H(5)      | 0.9300   |
| C(6)-C(7)      | 1.515(5) |
| C(7)-C(8)      | 1.521(4) |
| C(7)-H(7A)     | 0.9700   |
| C(7)-H(7B)     | 0.9700   |
| C(8)-N(1)      | 1.497(4) |
| C(8)-C(9)      | 1.520(5) |
| C(8)-H(8)      | 0.9800   |
| C(9)-C(10)     | 1.370(5) |
| C(9)-C(14)     | 1.400(5) |
| C(10)-C(11)    | 1.393(5) |
| C(10)-H(10)    | 0.9300   |
| C(11)-C(12)    | 1.392(6) |
| C(11)-C(15)    | 1.506(6) |
| C(12)-C(13)    | 1.388(6) |
| C(12)-H(12)    | 0.9300   |
| C(13)-C(14)    | 1.367(5) |
| C(13)-H(13)    | 0.9300   |
| C(14)-H(14)    | 0.9300   |
| C(15)-H(15A)   | 0.9600   |
| C(15)-H(15B)   | 0.9600   |
| C(15)-H(15C)   | 0.9600   |
| N(1)-S(1)      | 1.598(3) |
| N(1)-H(1N)     | 0.79(3)  |
| O(1)-S(1)      | 1.437(3) |
| O(2)-S(1)      | 1.432(3) |
| C(2)-C(1)-C(6) | 121.6(3) |
| C(2)-C(1)-S(1) | 117.9(3) |
| C(6)-C(1)-S(1) | 120.4(3) |
| C(1)-C(2)-C(3) | 120.1(4) |
| C(1)-C(2)-H(2) | 119.9    |
| C(3)-C(2)-H(2) | 119.9    |
| C(4)-C(3)-C(2) | 119.4(4) |
| C(4)-C(3)-H(3) | 120.3    |

|                     |          |
|---------------------|----------|
| C(2)-C(3)-H(3)      | 120.3    |
| C(3)-C(4)-C(5)      | 120.6(4) |
| C(3)-C(4)-H(4)      | 119.7    |
| C(5)-C(4)-H(4)      | 119.7    |
| C(4)-C(5)-C(6)      | 121.2(4) |
| C(4)-C(5)-H(5)      | 119.4    |
| C(6)-C(5)-H(5)      | 119.4    |
| C(5)-C(6)-C(1)      | 117.1(3) |
| C(5)-C(6)-C(7)      | 119.7(3) |
| C(1)-C(6)-C(7)      | 123.2(3) |
| C(6)-C(7)-C(8)      | 114.3(3) |
| C(6)-C(7)-H(7A)     | 108.7    |
| C(8)-C(7)-H(7A)     | 108.7    |
| C(6)-C(7)-H(7B)     | 108.7    |
| C(8)-C(7)-H(7B)     | 108.7    |
| H(7A)-C(7)-H(7B)    | 107.6    |
| N(1)-C(8)-C(9)      | 109.1(3) |
| N(1)-C(8)-C(7)      | 110.0(3) |
| C(9)-C(8)-C(7)      | 114.6(3) |
| N(1)-C(8)-H(8)      | 107.6    |
| C(9)-C(8)-H(8)      | 107.6    |
| C(7)-C(8)-H(8)      | 107.6    |
| C(10)-C(9)-C(14)    | 118.4(4) |
| C(10)-C(9)-C(8)     | 122.6(3) |
| C(14)-C(9)-C(8)     | 119.0(3) |
| C(9)-C(10)-C(11)    | 122.7(4) |
| C(9)-C(10)-H(10)    | 118.7    |
| C(11)-C(10)-H(10)   | 118.7    |
| C(12)-C(11)-C(10)   | 118.2(4) |
| C(12)-C(11)-C(15)   | 121.2(4) |
| C(10)-C(11)-C(15)   | 120.6(4) |
| C(13)-C(12)-C(11)   | 119.2(4) |
| C(13)-C(12)-H(12)   | 120.4    |
| C(11)-C(12)-H(12)   | 120.4    |
| C(14)-C(13)-C(12)   | 121.8(4) |
| C(14)-C(13)-H(13)   | 119.1    |
| C(12)-C(13)-H(13)   | 119.1    |
| C(13)-C(14)-C(9)    | 119.7(4) |
| C(13)-C(14)-H(14)   | 120.2    |
| C(9)-C(14)-H(14)    | 120.2    |
| C(11)-C(15)-H(15A)  | 109.5    |
| C(11)-C(15)-H(15B)  | 109.5    |
| H(15A)-C(15)-H(15B) | 109.5    |
| C(11)-C(15)-H(15C)  | 109.5    |



|                     |            |
|---------------------|------------|
| H(15A)-C(15)-H(15C) | 109.5      |
| H(15B)-C(15)-H(15C) | 109.5      |
| C(8)-N(1)-S(1)      | 117.0(2)   |
| C(8)-N(1)-H(1N)     | 114(3)     |
| S(1)-N(1)-H(1N)     | 116(2)     |
| O(2)-S(1)-O(1)      | 117.34(17) |
| O(2)-S(1)-N(1)      | 108.69(18) |
| O(1)-S(1)-N(1)      | 107.63(18) |
| O(2)-S(1)-C(1)      | 105.57(17) |
| O(1)-S(1)-C(1)      | 111.24(17) |
| N(1)-S(1)-C(1)      | 105.78(17) |

## 9. References

- (1) Xiao, D.; Zhang, X. *Angew. Chem., Int. Ed.* **2001**, *40*, 3425.
- (2) (a) Neustadt, B. R. *Tetrahedron Lett.* **1994**, *35*, 379.  
(b) Freitag, D.; Metz, P. *Tetrahedron* **2006**, *62*, 1799.
- (3) (a) Fang, F.; Wng, R.; Liu, Z.-P.; Ji, A.-G. *Heterocycles* **2007**, *71*, 2377.  
(b) Wang, Y.-Q.; Lu, S.-M.; Zhou, Y.-G. *J. Org. Chem.* **2007**, *72*, 3729.
- (4) Takeuchi, Y.; Liu, Z.-P.; Satoh, A.; Shiragami, T.; Shibata, N. *Chem. Pharm. Bull.* **1999**, *47*, 1730.
- (5) William, L. J. Thomas, D. G.; Aaron, L.D.; James, F. W. *J. Org. Chem.* **2005**, *70*, 9147.
- (6) Melchiorre. *et al. Annadi di Chimical(Rome, Italy)*. **1971**, *61*, 399.
- (7) Liu, X.-Y.; Li, C.-, H.; Che, C.-M. *Org. Lett.* **2006**, *8*, 2707.
- (8) Rao, B. K.; Hamor, G. H. *J. Pharm.Sciences.* **1969**, *58*, 1969.
- (9) Davis, F. A.; Towson, J. C.; Vashi, D, A.; Thimmareddy, R.; McCauley, J. P.; Harakal, M. E.; Gosciniak, D. J. *J. Org.Chem.* **1990**, *55*, 1254.

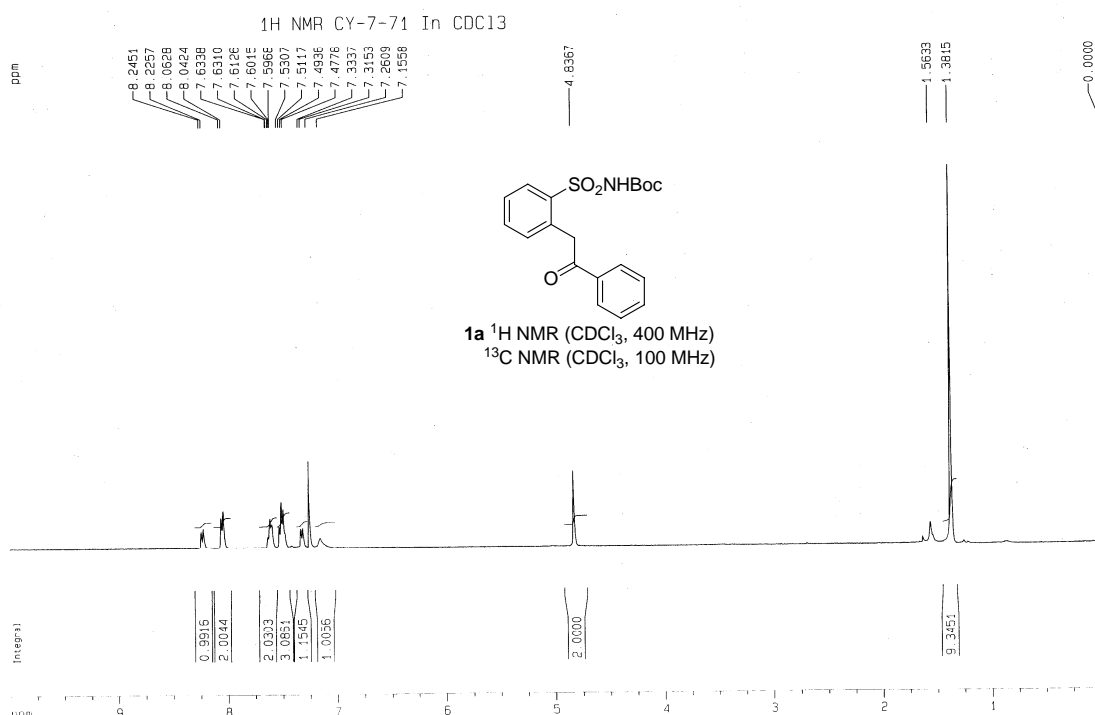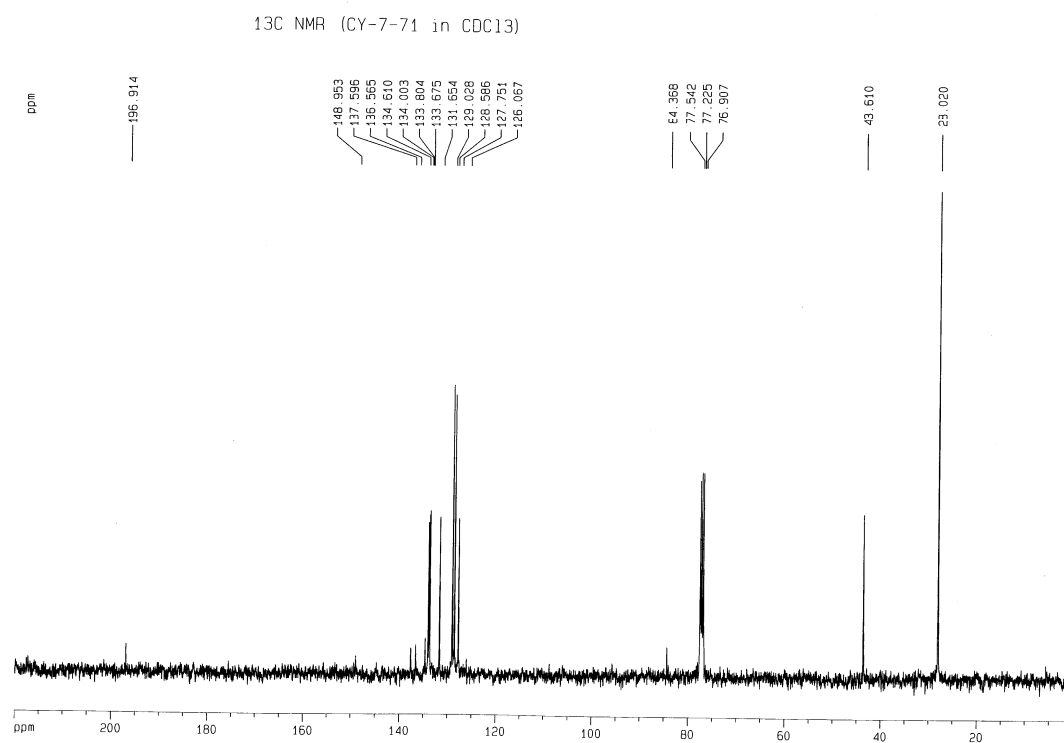

# Elemental Composition Report

Page 1

## Single Mass Analysis

Tolerance = 5.0 PPM / DBE: min = -1.5, max = 100.0

Selected filters: None

Monoisotopic Mass, Even Electron Ions

26 formula(e) evaluated with 1 results within limits (all results (up to 1000) for each mass)

Elements Used:

C: 10-40 H: 10-30 N: 1-4 O: 2-5 Na: 1-1 S: 1-1

CY-7-71

09101900 43 (1.113) AM (Cen,6, 80.00, Ar,5000.0,475.27,0.70,LS 10); Sm (SG, 2x3.00); Sb (1,40.00 ); Cm (31:50)

1: TOF MS ES+  
2.80e4

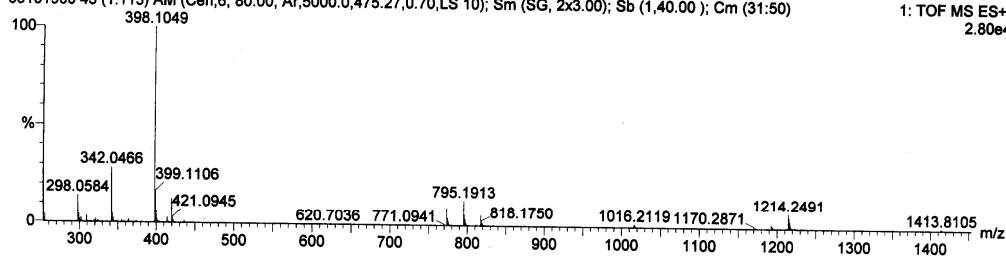

Minimum:

Maximum:

5.0

5.0

-1.5

100.0

| Mass     | Calc. Mass | mDa | PPM | DBE | i-FIT | Formula           |
|----------|------------|-----|-----|-----|-------|-------------------|
| 398.1049 | 398.1038   | 1.1 | 2.8 | 9.5 | 291.5 | C19 H21 N O5 Na S |

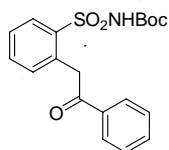

1a HRMS

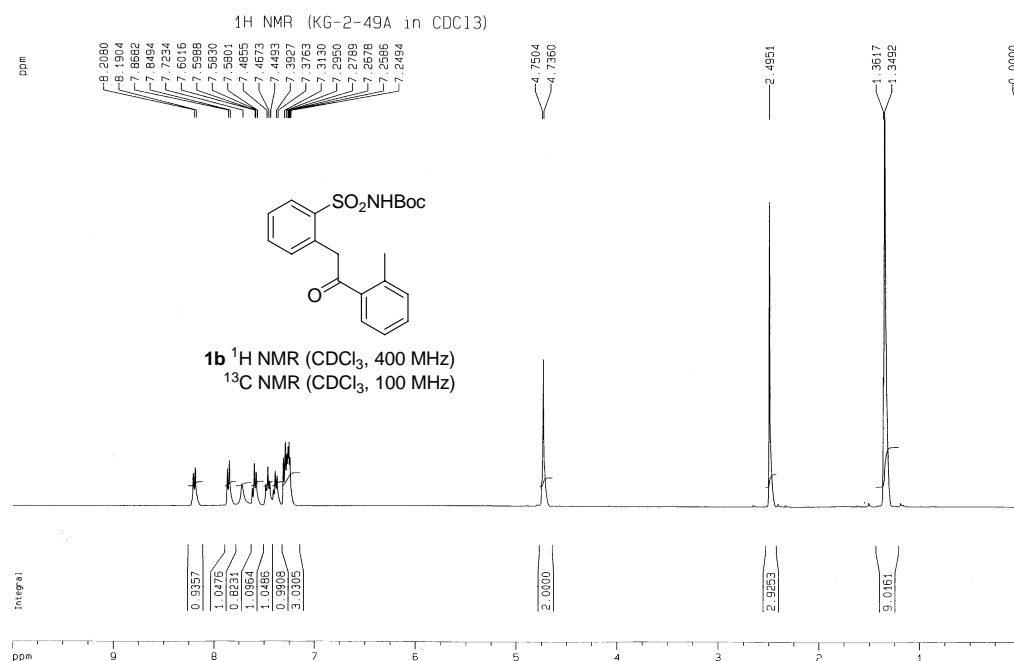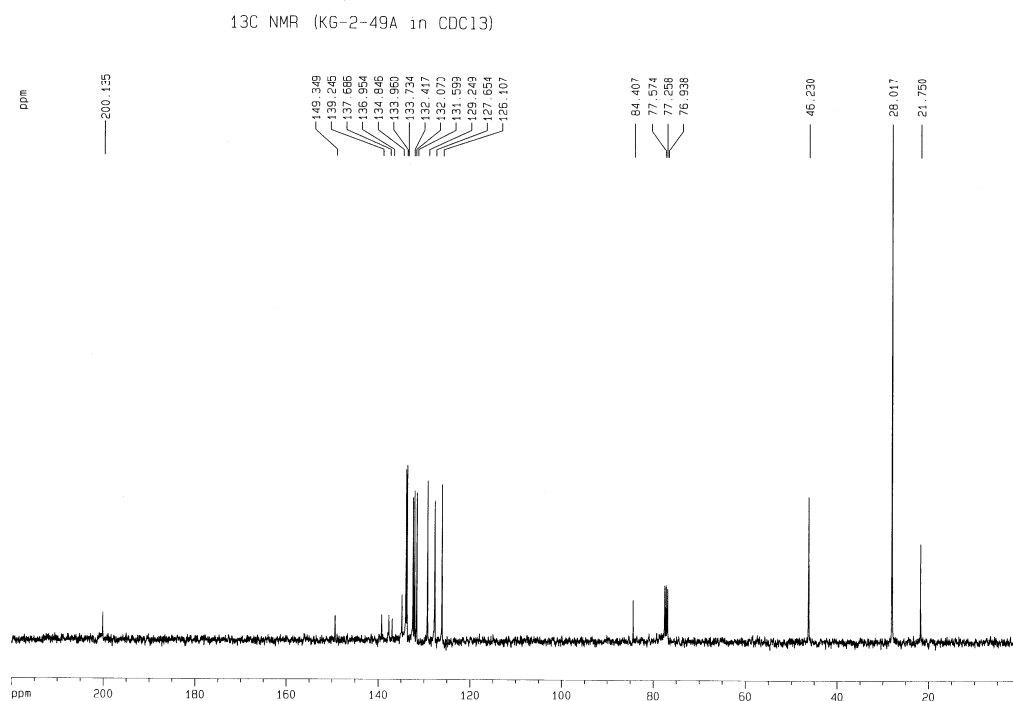

# Elemental Composition Report

Page 1

## Single Mass Analysis

Tolerance = 5.0 PPM / DBE: min = -1.5, max = 100.0

Selected filters: None

Monoisotopic Mass, Even Electron Ions

6 formula(e) evaluated with 1 results within limits (all results (up to 1000) for each mass)

Elements Used:

C: 10-40 H: 10-30 N: 1-4 O: 5-5 Na: 1-1 S: 1-1

CKG-2-49A

09101901 52 (1.328) AM (Cen, 6, 80.00, Ar, 5000.0, 475.27, 0.70, LS 10); Sm (SG, 2x3.00); Sb (1, 40.00); Cm (36.52)

1: TOF MS ES+  
2.10e4

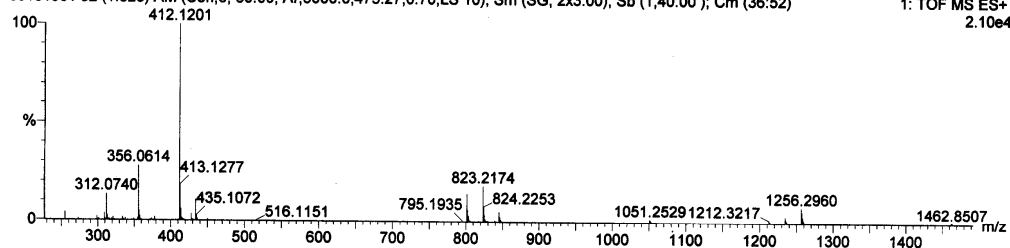

Minimum: -1.5  
Maximum: 5.0 5.0 100.0

| Mass     | Calc. Mass | mDa | PPM | DBE | i-FIT | Formula           |
|----------|------------|-----|-----|-----|-------|-------------------|
| 412.1201 | 412.1195   | 0.6 | 1.5 | 9.5 | 180.7 | C20 H23 N O5 Na S |

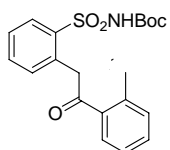

1b HRMS

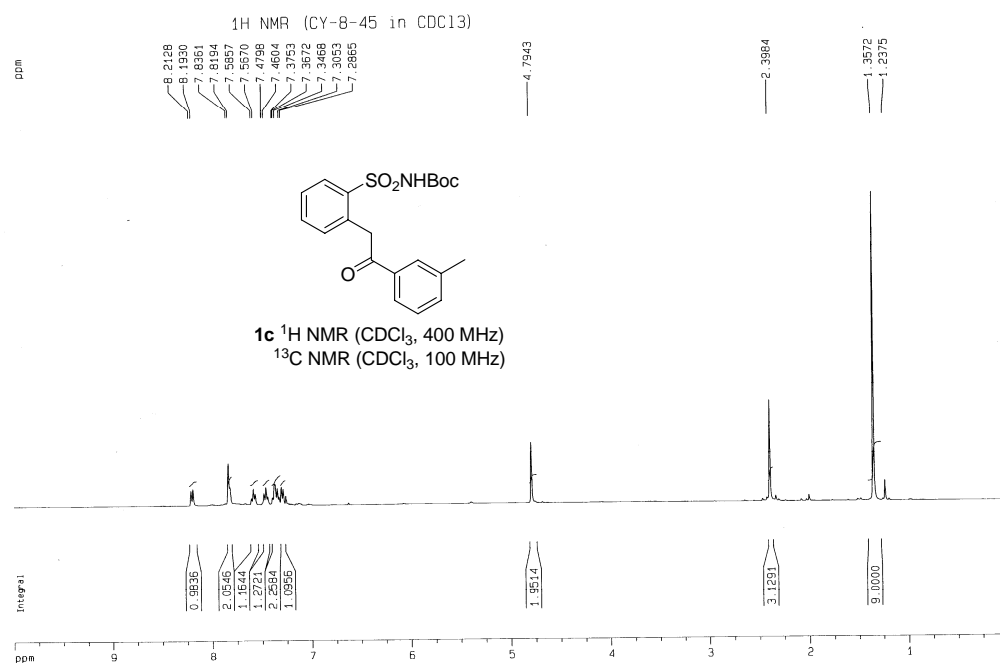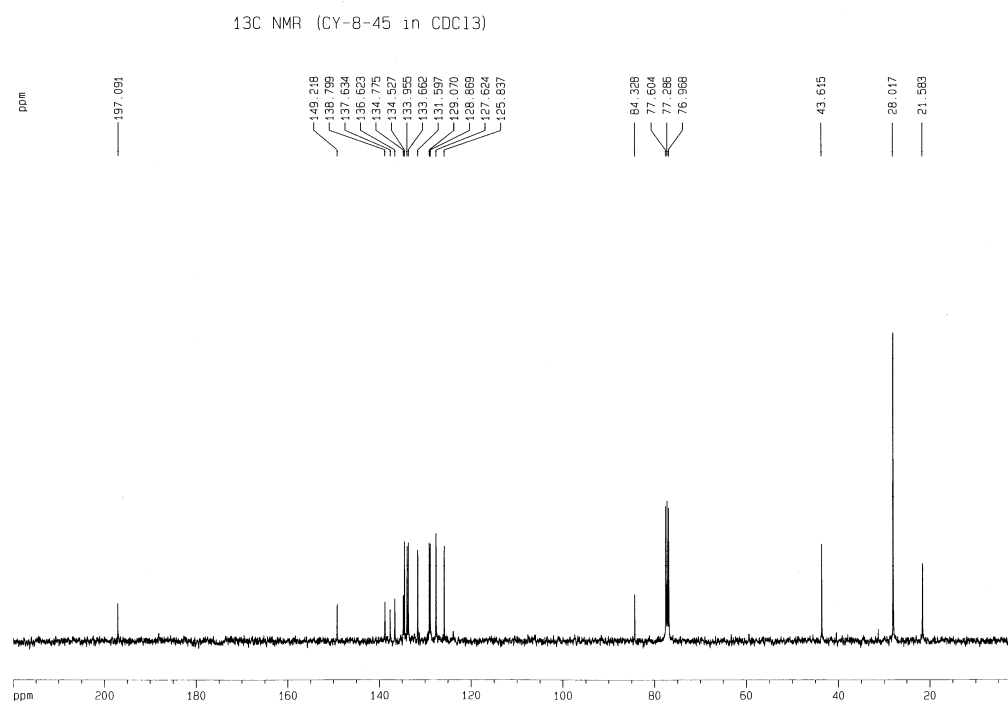

# Elemental Composition Report

Page 1

## Single Mass Analysis

Tolerance = 5.0 PPM / DBE: min = -1.5, max = 100.0

Selected filters: None

Monoisotopic Mass, Even Electron Ions

6 formula(e) evaluated with 1 results within limits (all results (up to 1000) for each mass)

Elements Used:

C: 10-40 H: 10-30 N: 1-4 O: 5-5 Na: 1-1 S: 1-1

CY-8-45

09101902 29 (0.730) AM (Cen,6, 80.00, Ar,5000.0,475.27,0.70,LS 10); Sm (SG, 2x3.00); Sb (1,40.00 ); Cm (20:38)

1: TOF MS ES+  
4.74e4

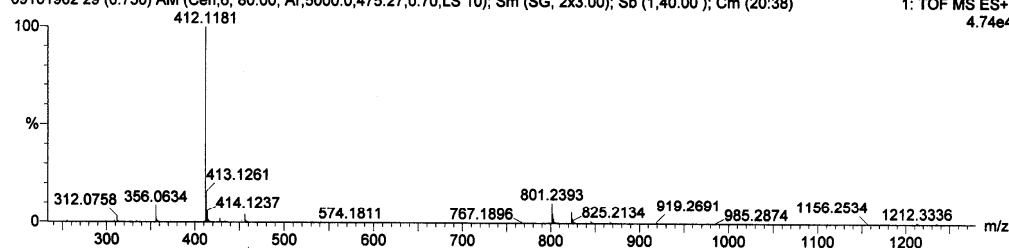

Minimum:

Maximum: 5.0 5.0 -1.5 100.0

| Mass     | Calc. Mass | mDa  | PPM  | DBE | i-FIT | Formula           |
|----------|------------|------|------|-----|-------|-------------------|
| 412.1181 | 412.1195   | -1.4 | -3.4 | 9.5 | 875.0 | C20 H23 N O5 Na S |

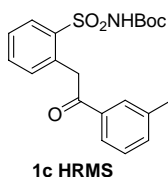



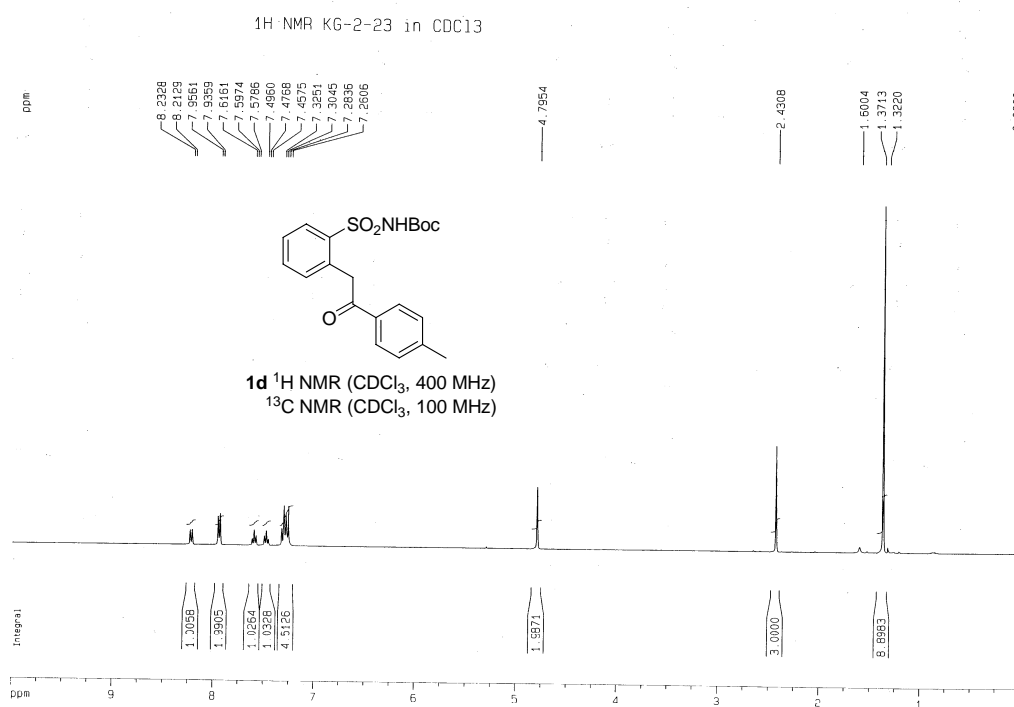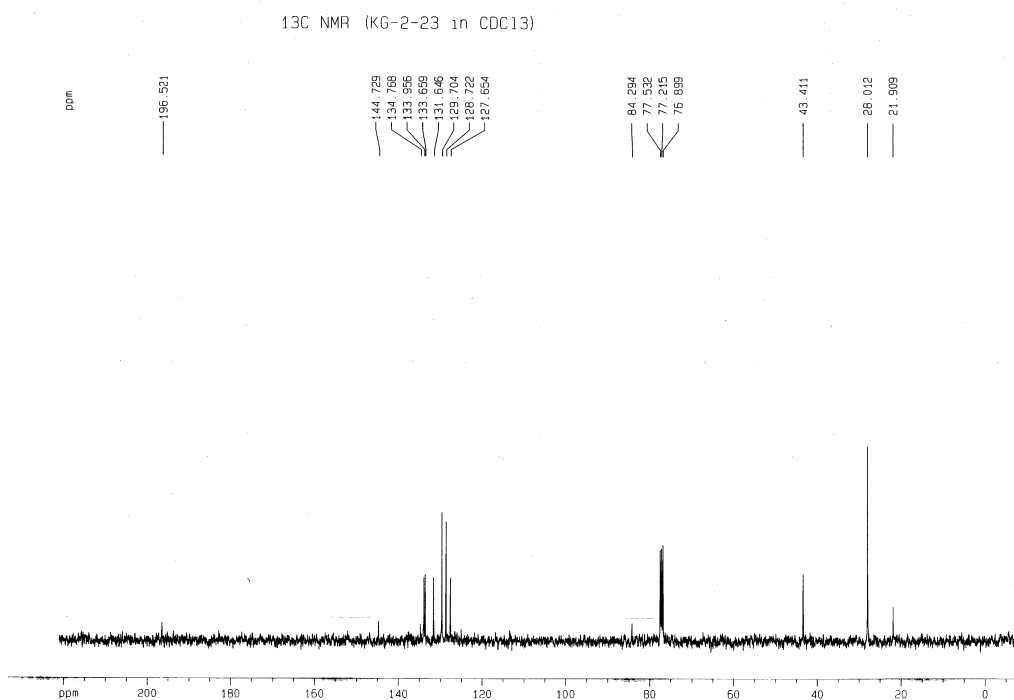

# Elemental Composition Report

Page 1

## Single Mass Analysis

Tolerance = 5.0 PPM / DBE: min = -1.5, max = 100.0

Selected filters: None

Monoisotopic Mass, Even Electron Ions

6 formula(e) evaluated with 1 results within limits (all results (up to 1000) for each mass)

Elements Used:

C: 10-40 H: 10-30 N: 1-4 O: 5-5 Na: 1-1 S: 1-1

KG-2-23

09101903 7 (0.195) AM (Cen,6, 80.00, Ar,5000.0,475.27,0.70,LS 10); Sm (SG, 2x3.00); Sb (1,40.00); Cm (7:27)

1: TOF MS ES+  
2.74e4

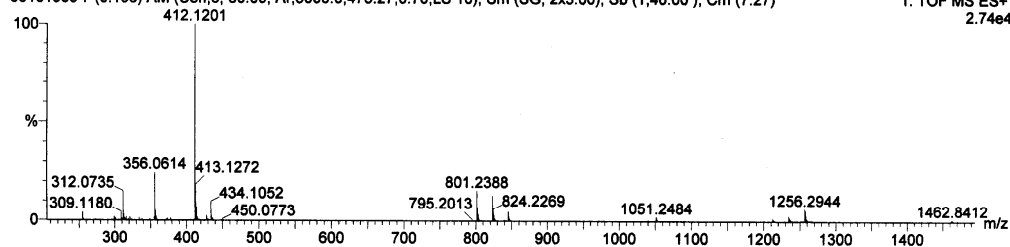

Minimum:

Maximum: 5.0 5.0 -1.5

| Mass     | Calc. Mass | mDa | PPM | DBE | i-FIT | Formula           |
|----------|------------|-----|-----|-----|-------|-------------------|
| 412.1201 | 412.1195   | 0.6 | 1.5 | 9.5 | 197.5 | C20 H23 N O5 Na S |

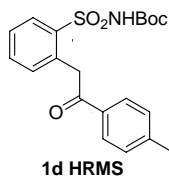

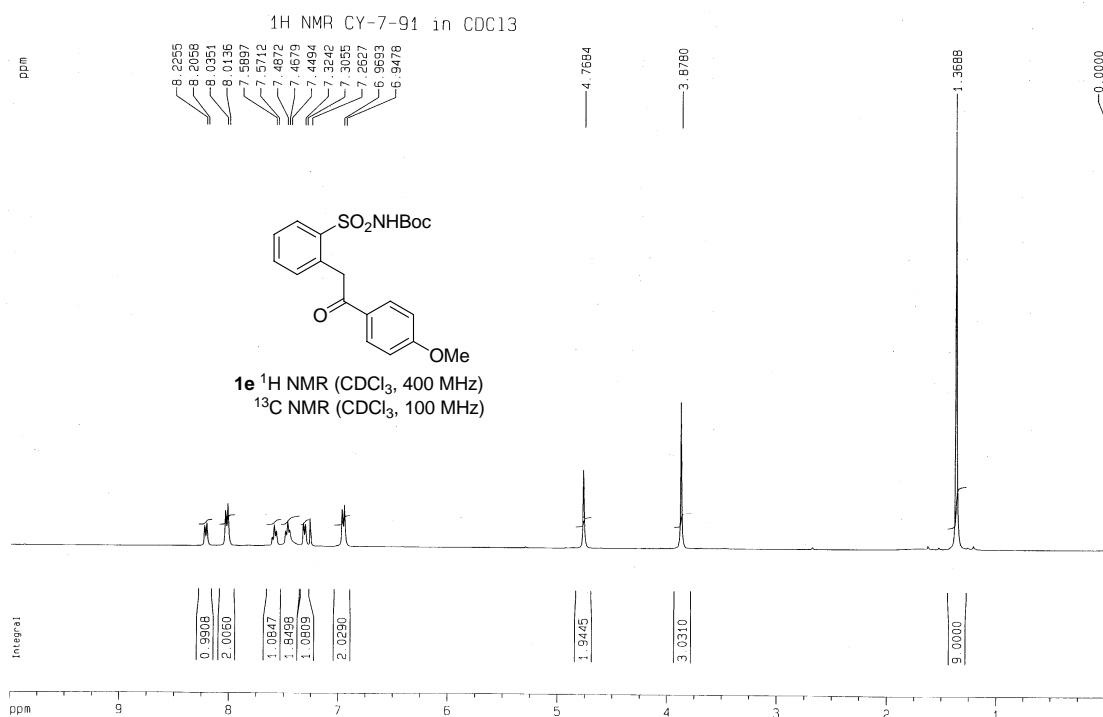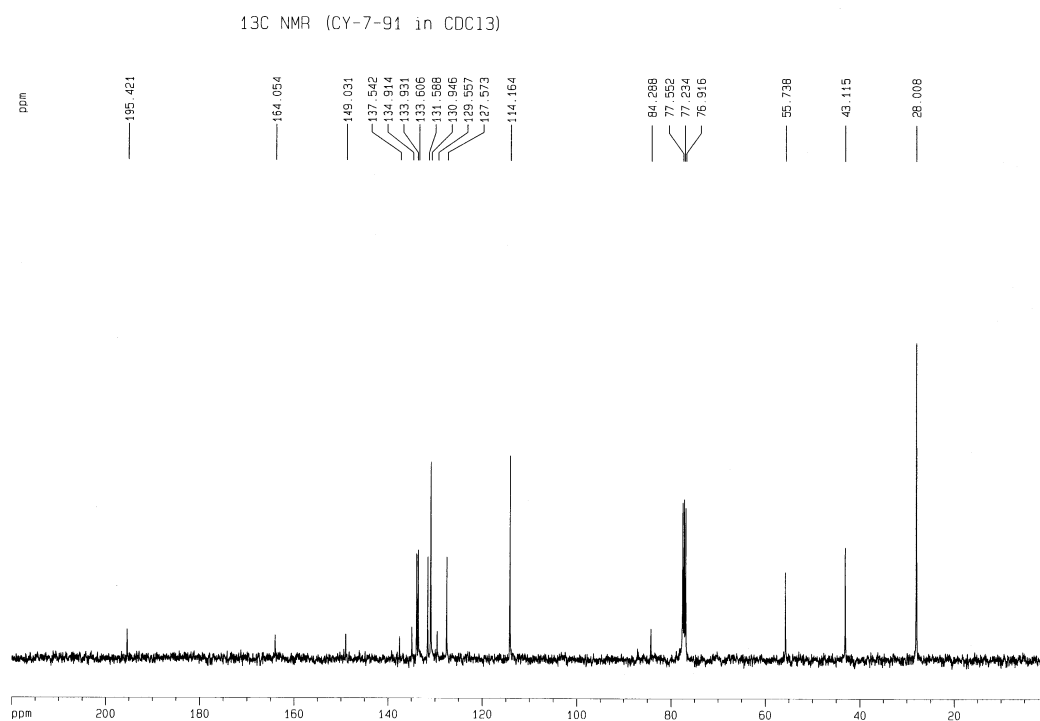

# Elemental Composition Report

Page 1

## Single Mass Analysis

Tolerance = 5.0 PPM / DBE: min = -1.5, max = 100.0

Selected filters: None

Monoisotopic Mass, Odd and Even Electron Ions

4 formula(e) evaluated with 1 results within limits (all results (up to 1000) for each mass)

Elements Used:

C: 10-40 H: 10-30 N: 1-1 O: 5-6 Na: 1-1 S: 1-1

CY-7-91

09101906 7 (0.194) AM (Cen,6, 80.00, Ar,5000.0,475.27,0.70,LS 10); Sm (SG, 2x3.00); Sb (1,40.00 ); Cm (1:14)

1: TOF MS ES+  
2.21e4

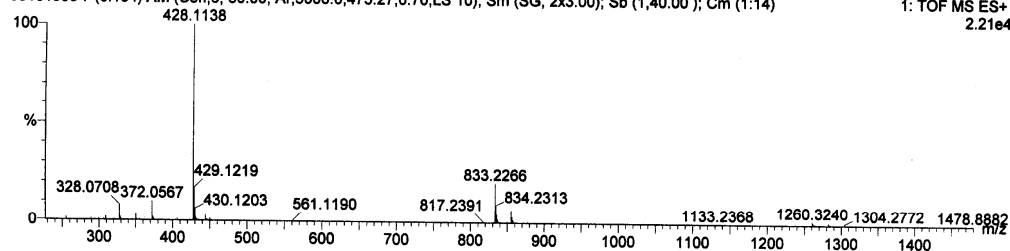

| Minimum: |            |      |      | -1.5  |       |                   |
|----------|------------|------|------|-------|-------|-------------------|
| Maximum: |            | 5.0  | 5.0  | 100.0 |       |                   |
| Mass     | Calc. Mass | mDa  | PPM  | DBE   | i-FIT | Formula           |
| 428.1138 | 428.1144   | -0.6 | -1.4 | 9.5   | 296.2 | C20 H23 N O6 Na S |

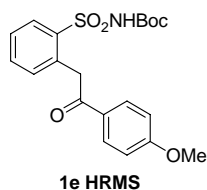

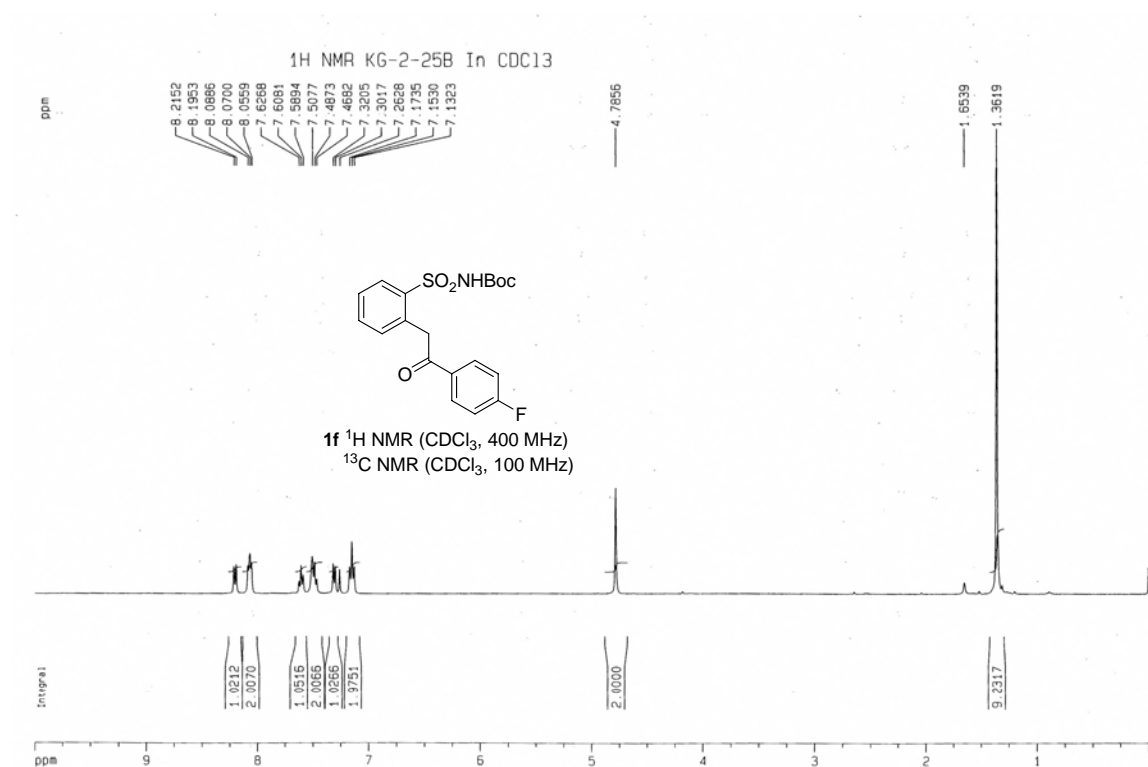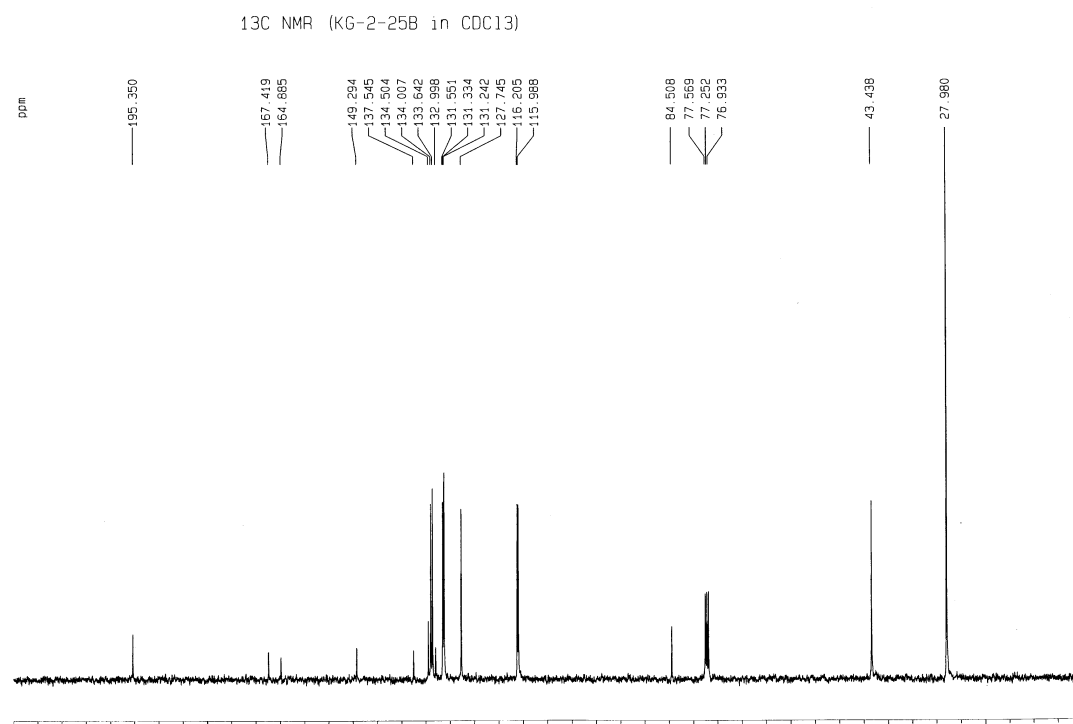

# Elemental Composition Report

Page 1

## Single Mass Analysis

Tolerance = 5.0 PPM / DBE: min = -1.5, max = 100.0  
Selected filters: None

Monoisotopic Mass, Odd and Even Electron Ions

1 formula(e) evaluated with 1 results within limits (all results (up to 1000) for each mass)

Elements Used:

C: 10-40 H: 10-30 N: 1-1 O: 5-5 F: 1-1 Na: 1-1 S: 1-1

KG-2-25B

09101904 16 (0.402) AM (Cen,6, 80.00, Ar,5000.0,475.27,0.70,LS 10); Sm (SG, 2x3.00); Sb (1,40.00); Cm (10:18)

1: TOF MS ES+  
1.64e4

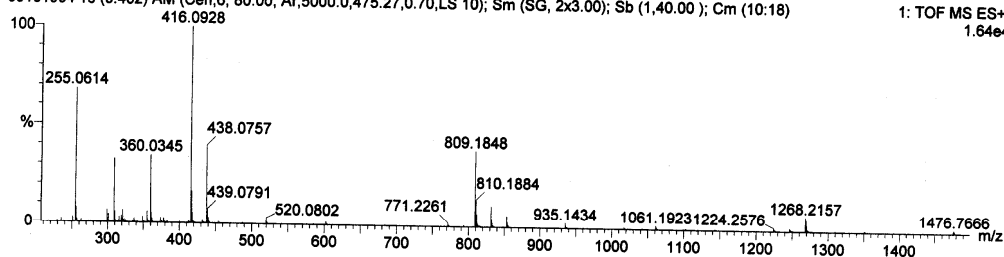

Minimum:

Maximum:

5.0

5.0

-1.5

100.0

Mass

Calc. Mass

mDa

PPM

DBE

i-FIT

Formula

416.0928

416.0944

-1.6

-3.8

9.5

208.0

C19 H20 N O5 F Na S

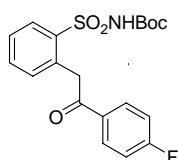

1f HRMS

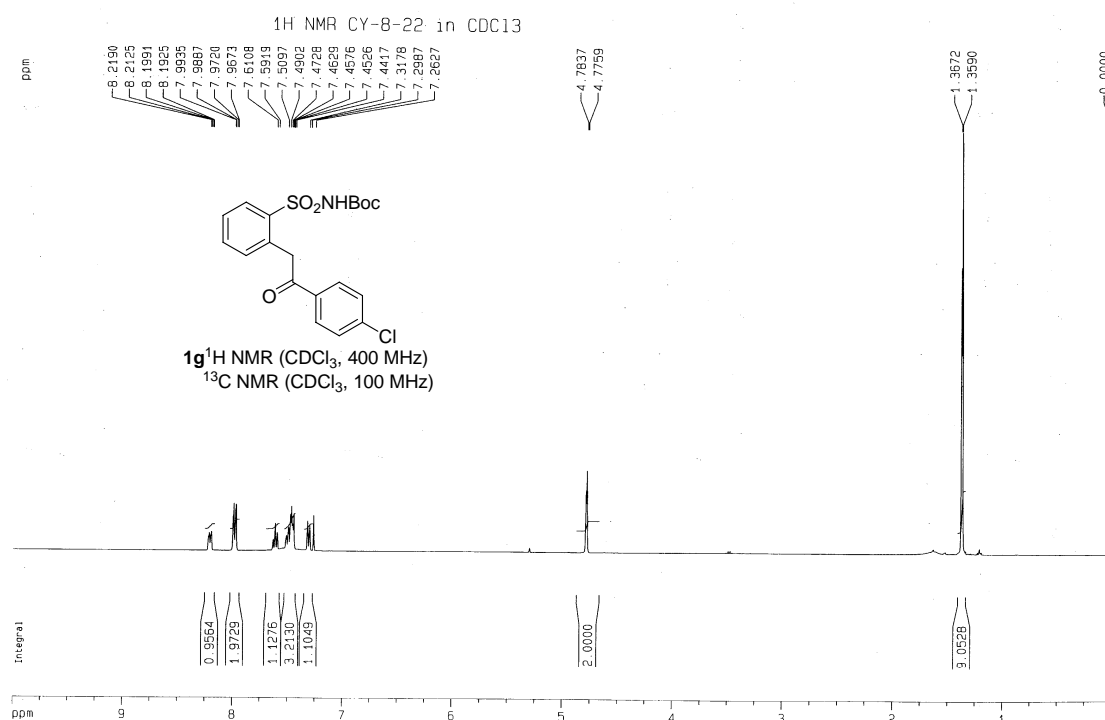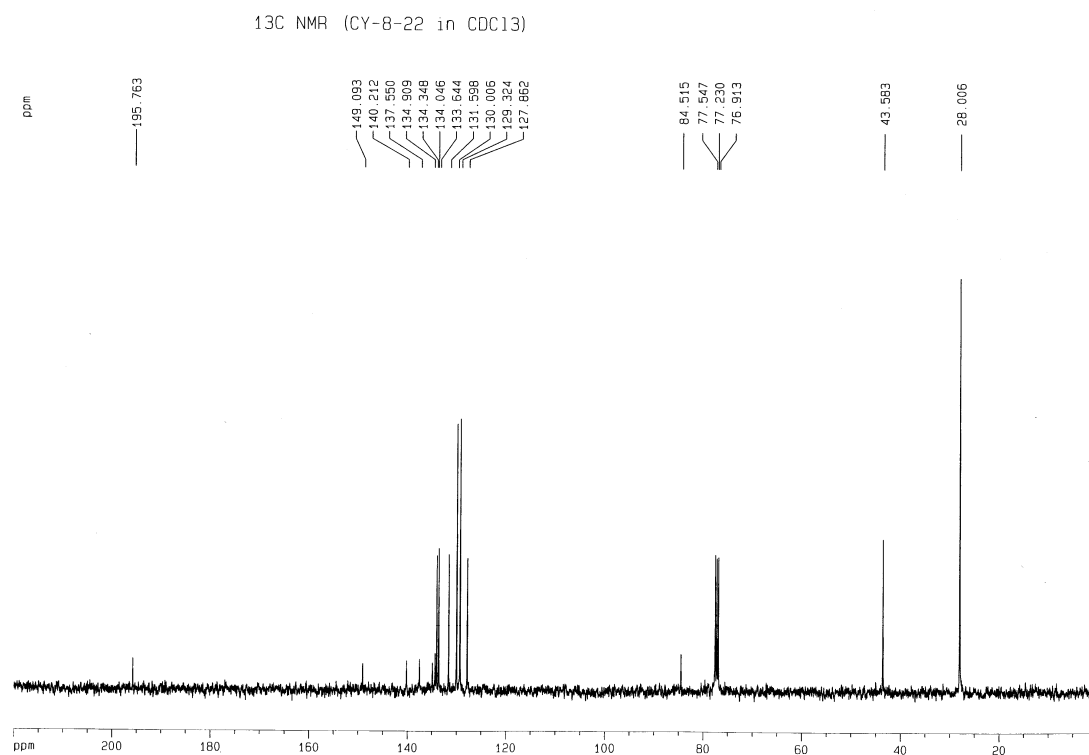

# Elemental Composition Report

Page 1

## Single Mass Analysis

Tolerance = 5.0 PPM / DBE: min = -1.5, max = 100.0

Selected filters: None

Monoisotopic Mass, Odd and Even Electron Ions

2 formula(e) evaluated with 1 results within limits (all results (up to 1000) for each mass)

Elements Used:

C: 10-40 H: 10-30 N: 1-1 O: 5-5 Na: 1-1 S: 1-1 Cl: 1-2

KCY-8-22

09101905 4 (0.097) AM (Cen,6, 80.00, Ar,5000.0,475.27,0.70,LS 10); Sm (SG, 2x3.00); Sb (1,40.00); Cm (3:12)

1: TOF MS ES+  
9.25e3

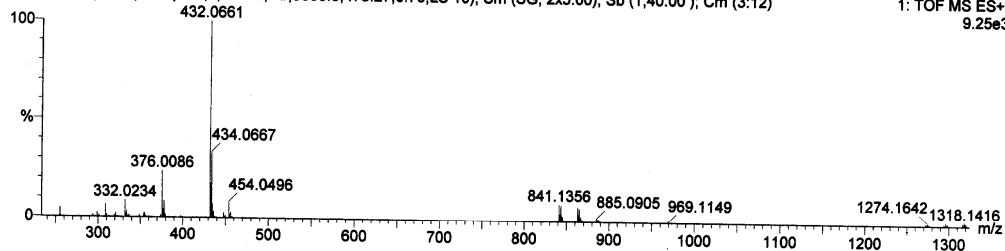

Minimum:

Maximum:

5.0

5.0

-1.5

100.0

Mass

Calc. Mass

mDa

PPM

DBE

i-FIT

Formula

432.0661

432.0648

1.3

3.0

9.5

74.9

C19 H20 N O5 Na S Cl

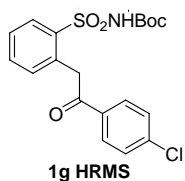



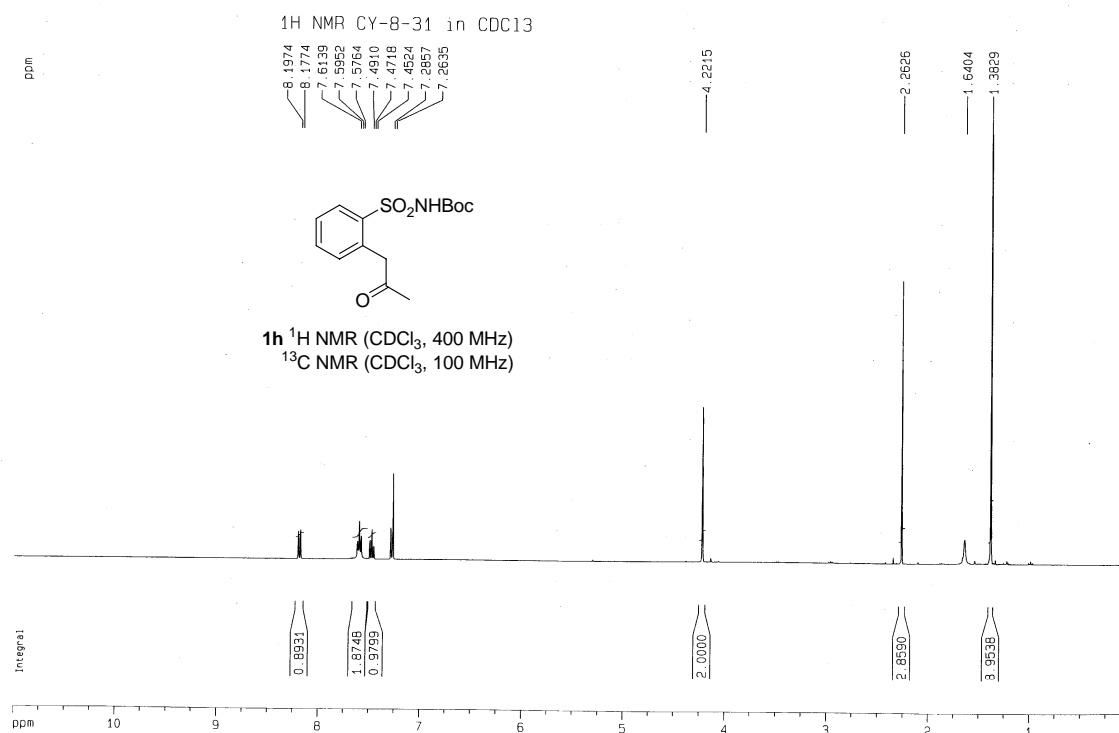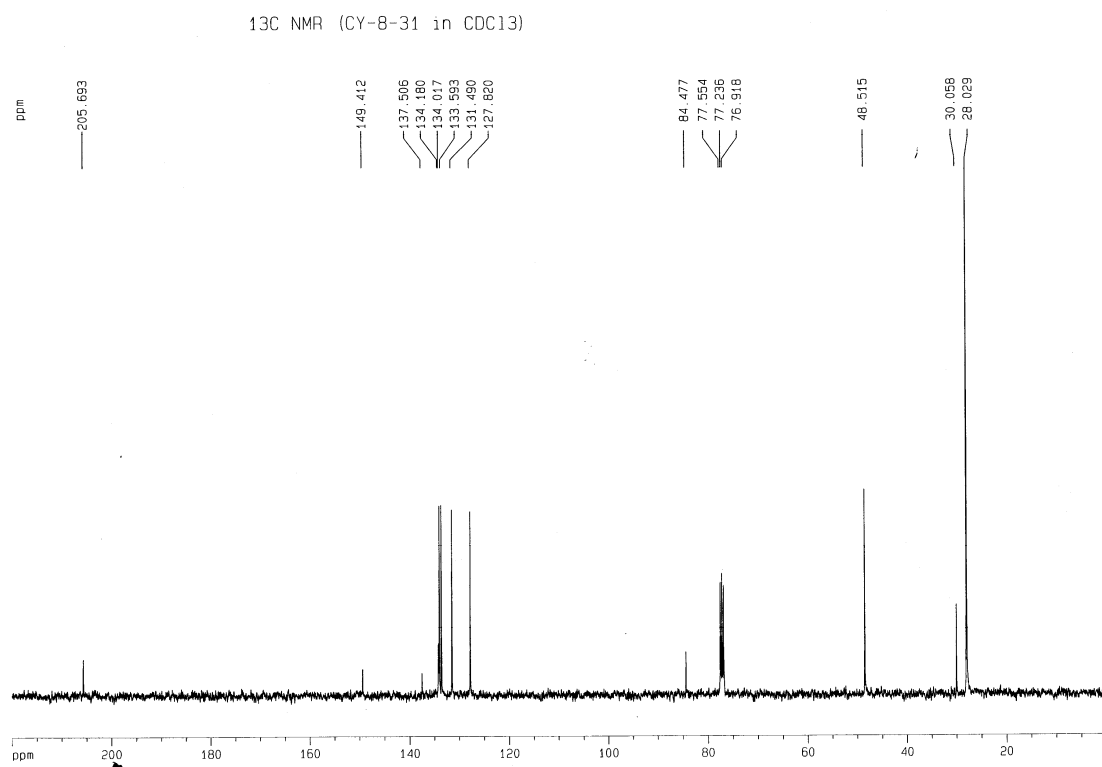

# Elemental Composition Report

Page 1

## Single Mass Analysis

Tolerance = 5.0 PPM / DBE: min = -1.5, max = 100.0

Selected filters: None

Monoisotopic Mass, Odd and Even Electron Ions

10 formula(e) evaluated with 1 results within limits (all results (up to 1000) for each mass)

Elements Used:

C: 10-40 H: 10-30 N: 1-1 O: 1-6 Na: 1-1 S: 1-1

CY-8-31

09101908 5 (0.115) AM (Cen,6, 80.00, Ar,5000.0,475.27,0.70,LS 10); Sm (SG, 2x3.00); Sb (1,40.00); Cm (1:19)

1: TOF MS ES+  
2.08e4

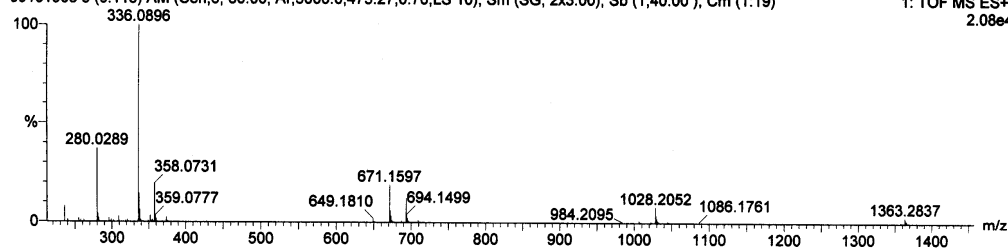

Minimum: -1.5  
Maximum: 5.0 5.0 100.0

| Mass     | Calc. Mass | mDa | PPM | DBE | i-FIT | Formula           |
|----------|------------|-----|-----|-----|-------|-------------------|
| 336.0896 | 336.0882   | 1.4 | 4.2 | 5.5 | 64.2  | C14 H19 N O5 Na S |

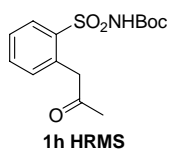

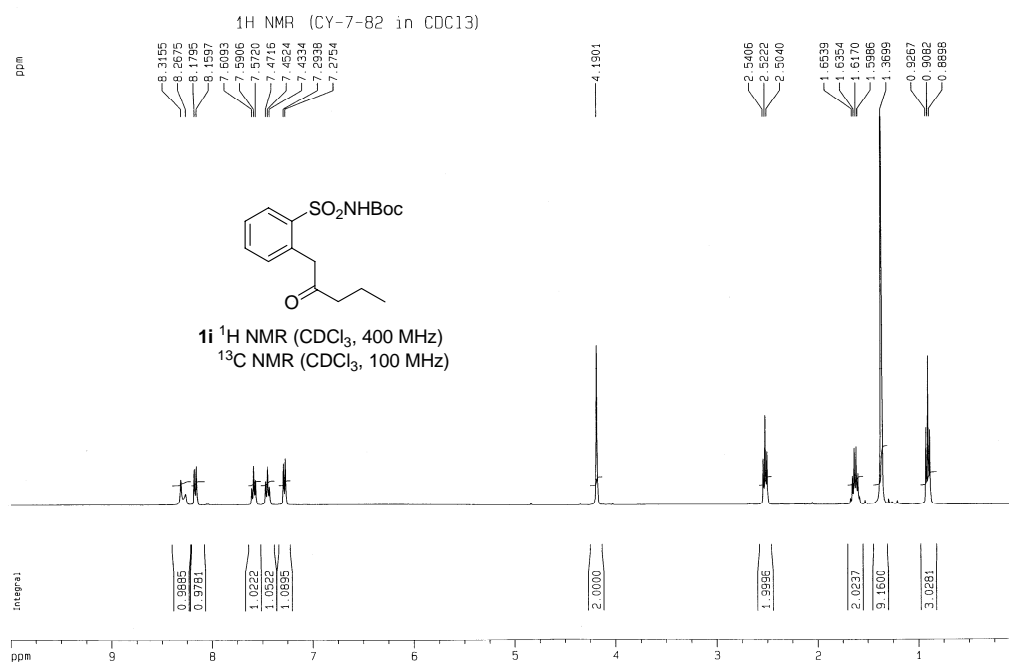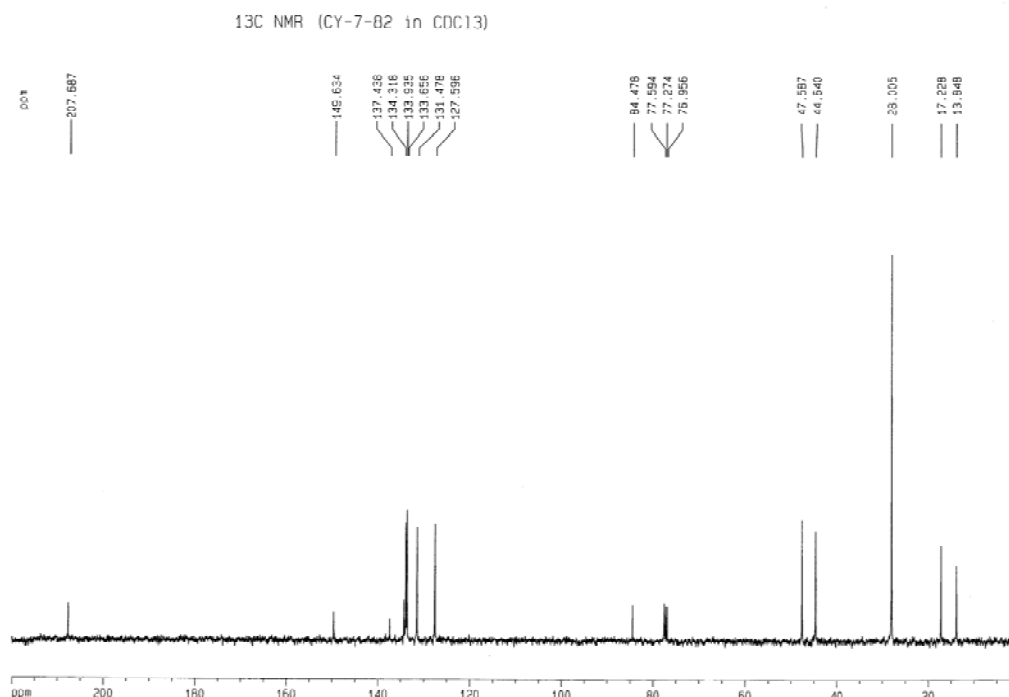

# Elemental Composition Report

Page 1

## Single Mass Analysis

Tolerance = 5.0 PPM / DBE: min = -1.5, max = 100.0

Selected filters: None

Monoisotopic Mass, Odd and Even Electron Ions

49 formula(e) evaluated with 1 results within limits (all results (up to 1000) for each mass)

Elements Used:

C: 10-76 H: 10-80 N: 1-3 O: 4-6 Na: 1-1 S: 1-2

CY-7-82

09112003 7 (0.195) AM (Cen,6, 80.00, Ar,5000.0,475.27,0.70,LS 10); Sm (SG, 2x3.00); Sb (1,40.00); Cm (4:32)

1: TOF MS ES+  
6.31e4

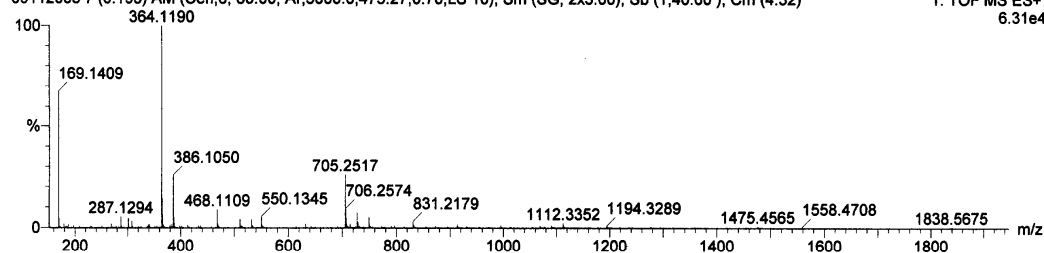

Minimum:  
Maximum:

-1.5  
100.0

| Mass     | Calc. Mass | mDa  | PPM  | DBE | i-FIT | Formula           |
|----------|------------|------|------|-----|-------|-------------------|
| 364.1190 | 364.1195   | -0.5 | -1.4 | 5.5 | 536.1 | C16 H23 N O5 Na S |

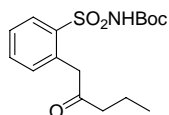

1i HRMS

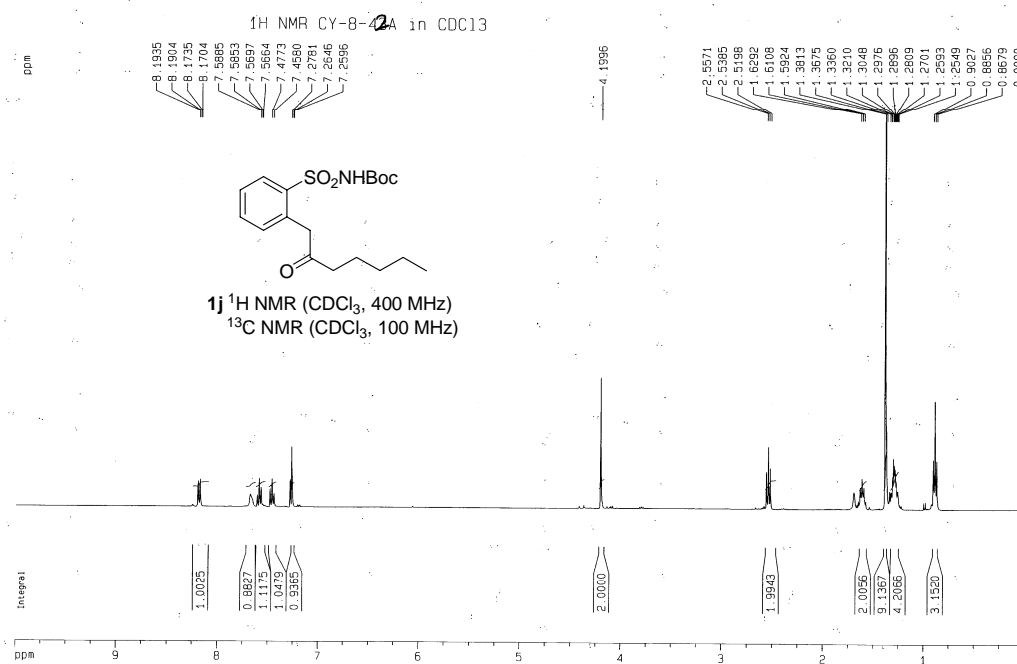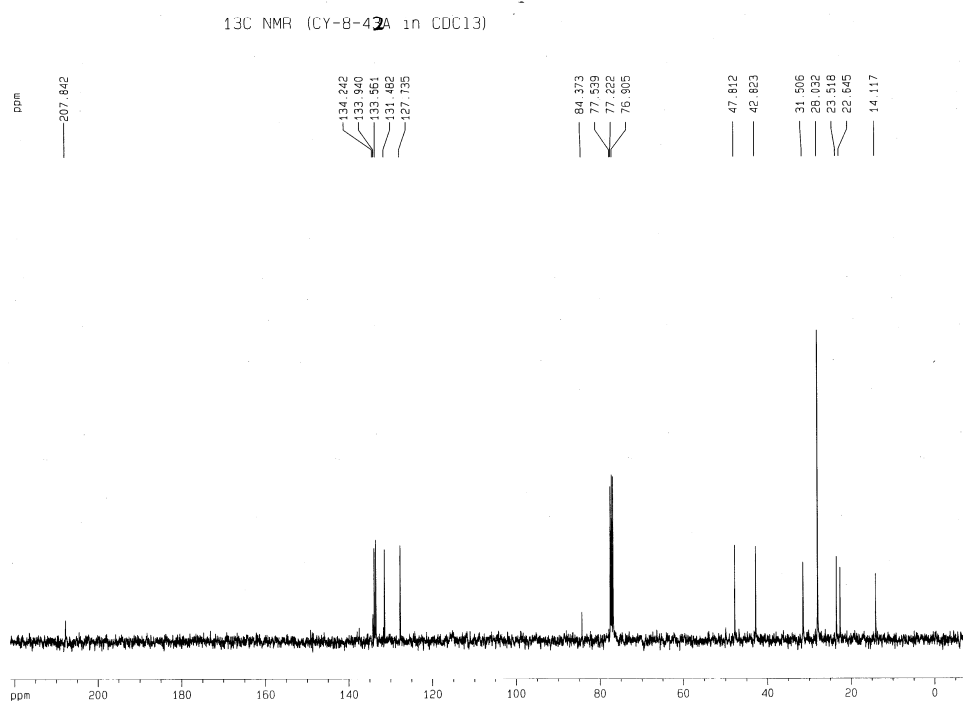

# Elemental Composition Report

Page 1

## Single Mass Analysis

Tolerance = 5.0 PPM / DBE: min = -1.5, max = 100.0

Selected filters: None

Monoisotopic Mass, Odd and Even Electron Ions

4 formula(e) evaluated with 1 results within limits (all results (up to 1000) for each mass)

Elements Used:

C: 10-60 H: 8-80 N: 1-1 O: 5-5 Na: 1-1

CY-8-42A

09121505 24 (0.593) AM (Cen,6, 80.00, Ar,5000.0,475.27,0.70,LS 10); Sm (SG, 2x3.00); Sb (1,40.00 ); Cm (16:30)

1: TOF MS ES+  
4.28e4

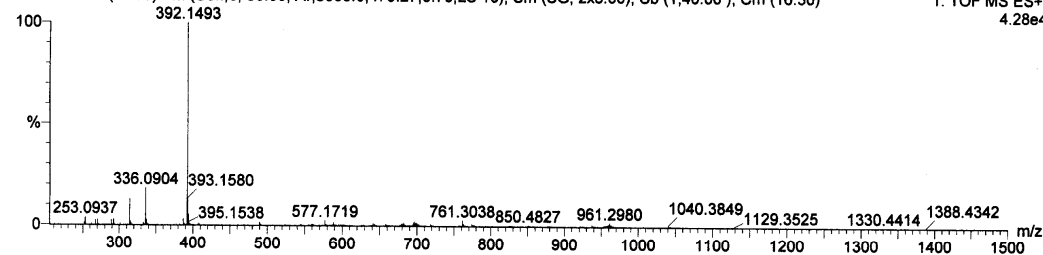

Minimum:

Maximum: 5.0 5.0 -1.5

| Mass     | Calc. Mass | mDa | PPM | DBE  | i-FIT  | Formula         |
|----------|------------|-----|-----|------|--------|-----------------|
| 392.1493 | 392.1474   | 1.9 | 4.8 | 10.5 | 1568.5 | C21 H23 N O5 Na |

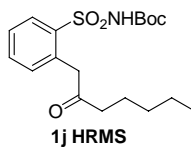

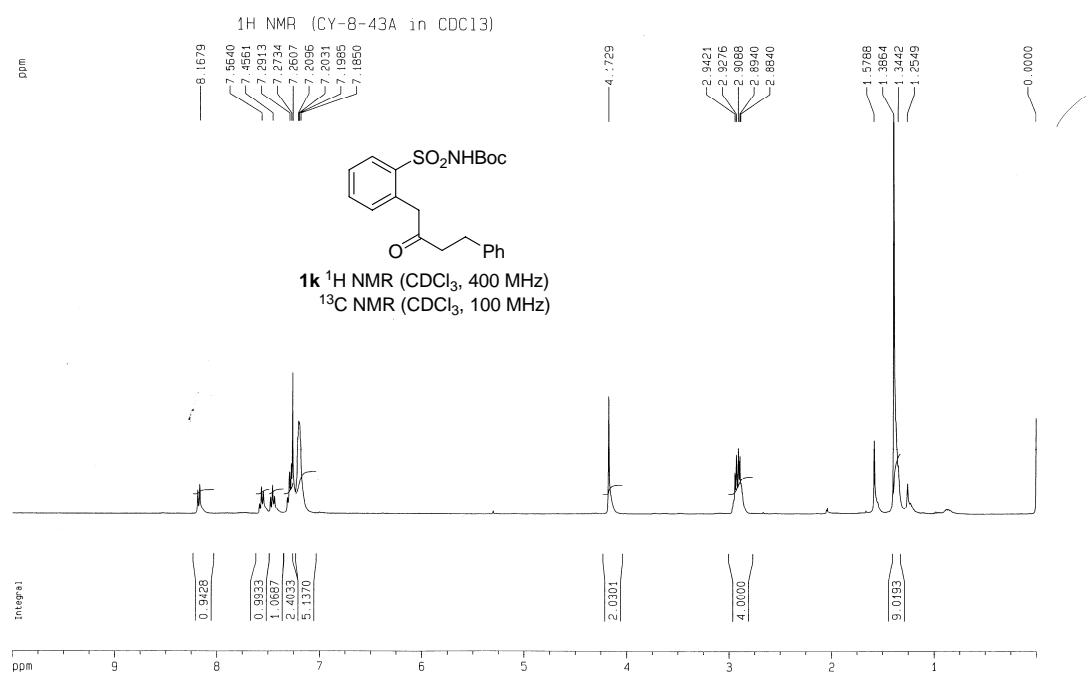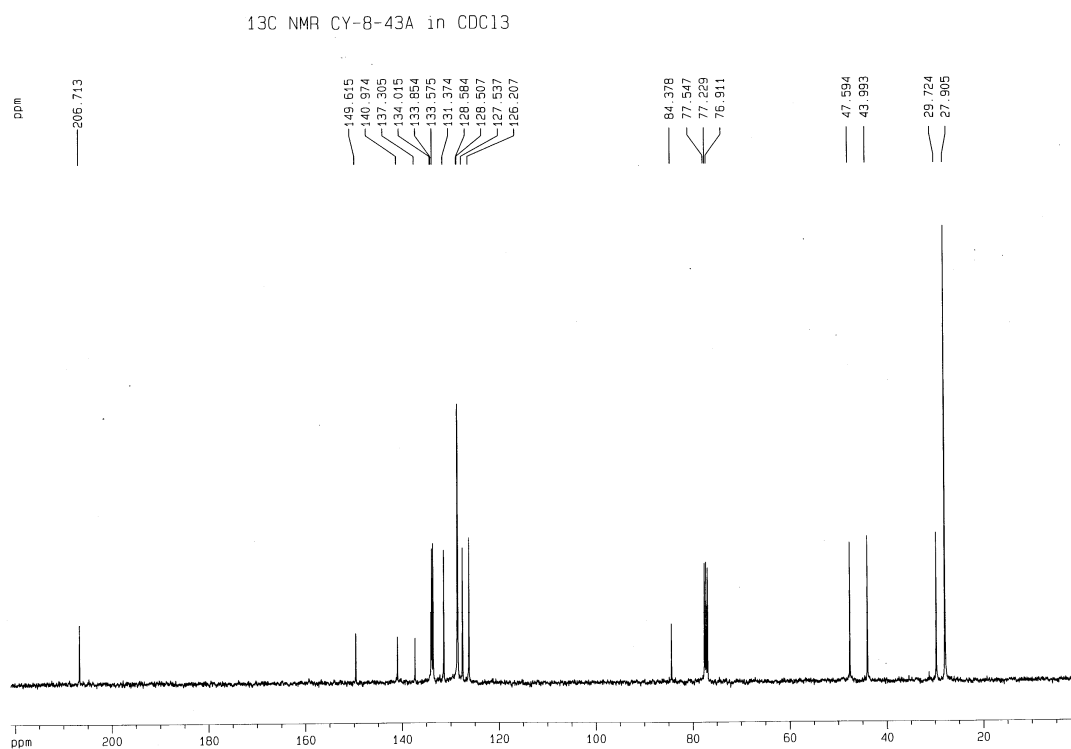

# Elemental Composition Report

Page 1

## Single Mass Analysis

Tolerance = 5.0 PPM / DBE: min = -1.5, max = 100.0

Selected filters: None

Monoisotopic Mass, Even Electron Ions

32 formula(e) evaluated with 1 results within limits (all results (up to 1000) for each mass)

Elements Used:

C: 10-76 H: 10-80 N: 1-3 O: 4-6 Na: 1-1 S: 1-1

CY-8-43A

09112004 6 (0.134) AM (Cen, 6, 80.00, Ar, 5000.0, 475.27, 0.70, LS 10); Sm (SG, 2x3.00); Sb (1, 40.00); Cm (1:18)

1: TOF MS ES+  
3.84e4

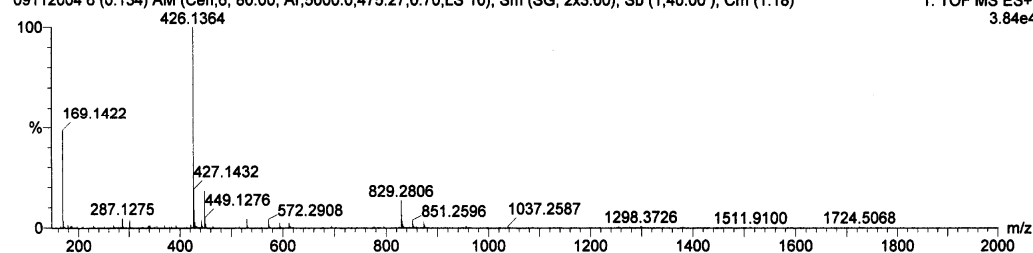

Minimum: -1.5  
Maximum: 5.0 5.0 100.0

| Mass     | Calc. Mass | mDa | PPM | DBE | i-FIT | Formula           |
|----------|------------|-----|-----|-----|-------|-------------------|
| 426.1364 | 426.1351   | 1.3 | 3.1 | 9.5 | 308.8 | C21 H25 N O5 Na S |

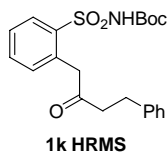



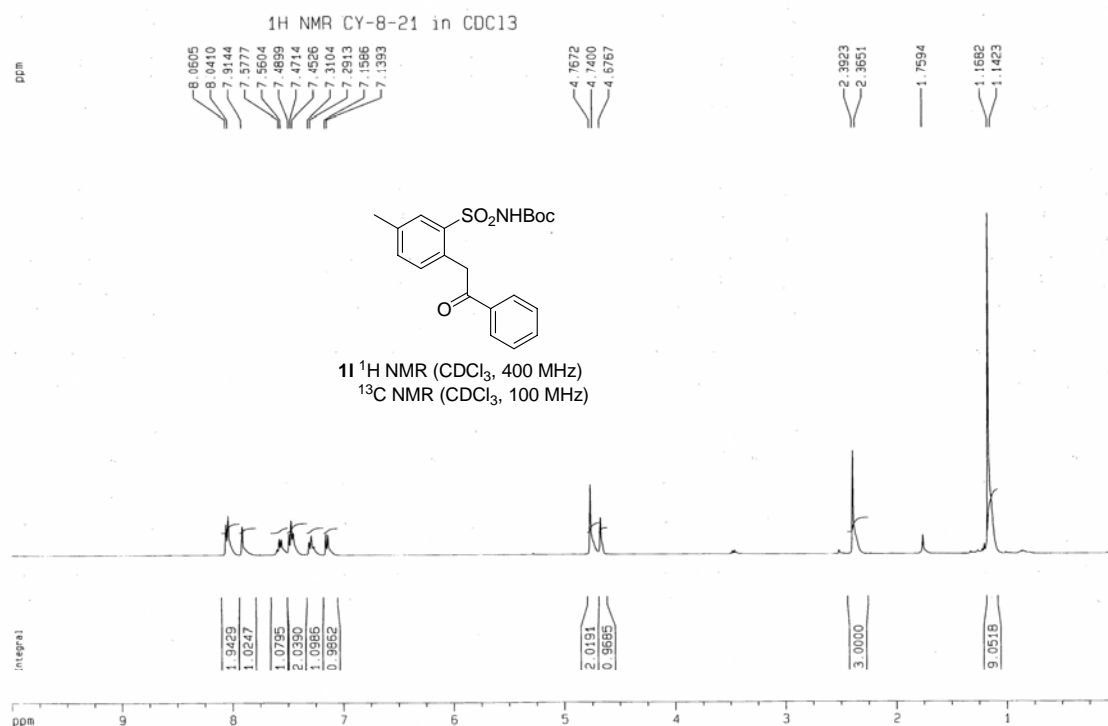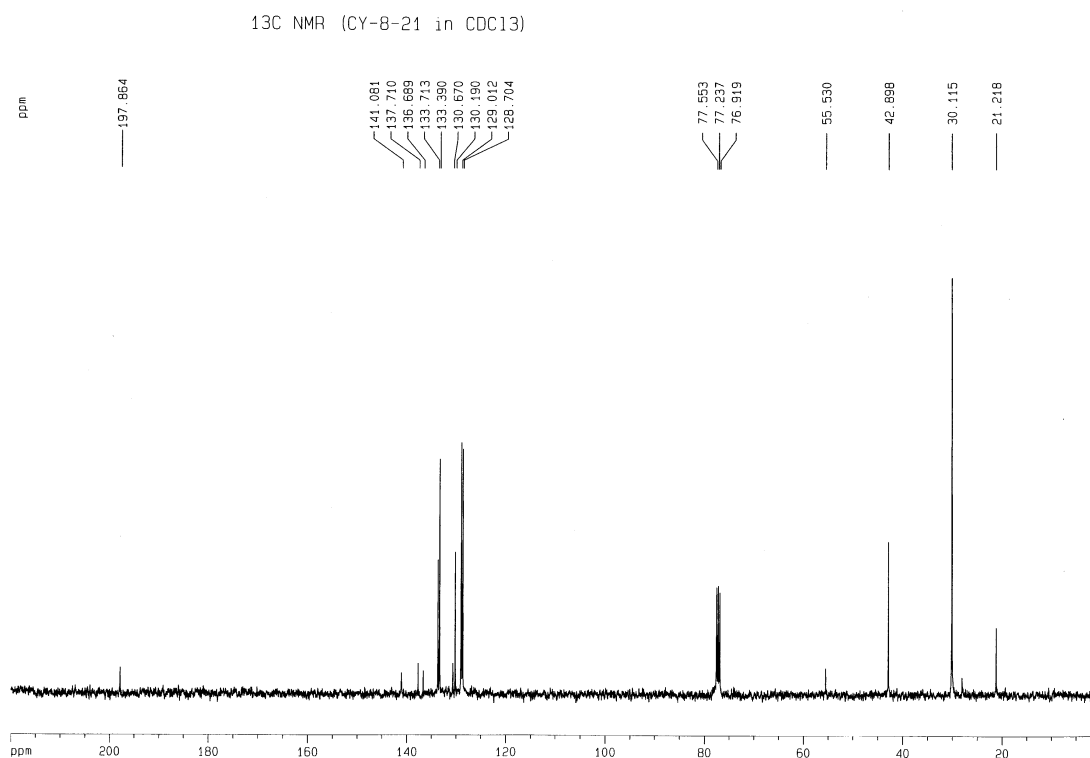

# Elemental Composition Report

Page 1

## Single Mass Analysis

Tolerance = 5.0 PPM / DBE: min = -1.5, max = 100.0

Selected filters: None

Monoisotopic Mass, Odd and Even Electron Ions

10 formula(e) evaluated with 1 results within limits (all results (up to 1000) for each mass)

Elements Used:

C: 10-40 H: 10-30 N: 1-1 O: 1-6 Na: 1-1 S: 1-1

CY-8-21

09101907 54 (1.367) AM (Cen,6, 80.00, Ar,5000.0,475.27,0.70,LS 10); Sm (SG, 2x3.00); Sb (1,40.00); Cm (51:55)

1: TOF MS ES+  
7.68e3

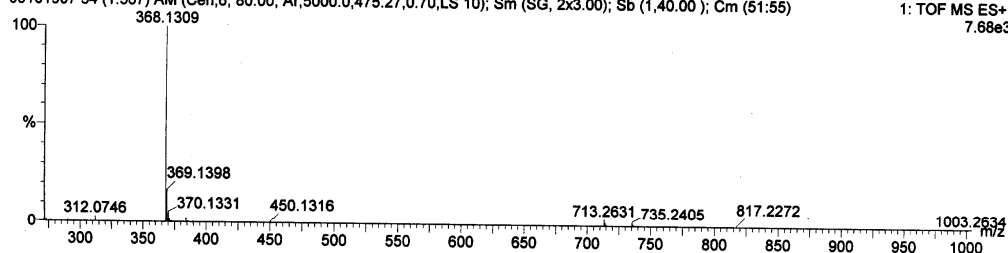

| Minimum: |            |     |     | -1.5  |       |                   |
|----------|------------|-----|-----|-------|-------|-------------------|
| Maximum: |            | 5.0 | 5.0 | 100.0 |       |                   |
| Mass     | Calc. Mass | mDa | PPM | DBE   | i-FIT | Formula           |
| 368.1309 | 368.1296   | 1.3 | 3.5 | 8.5   | 90.5  | C19 H23 N O3 Na S |

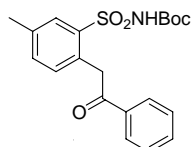

11 HRMS

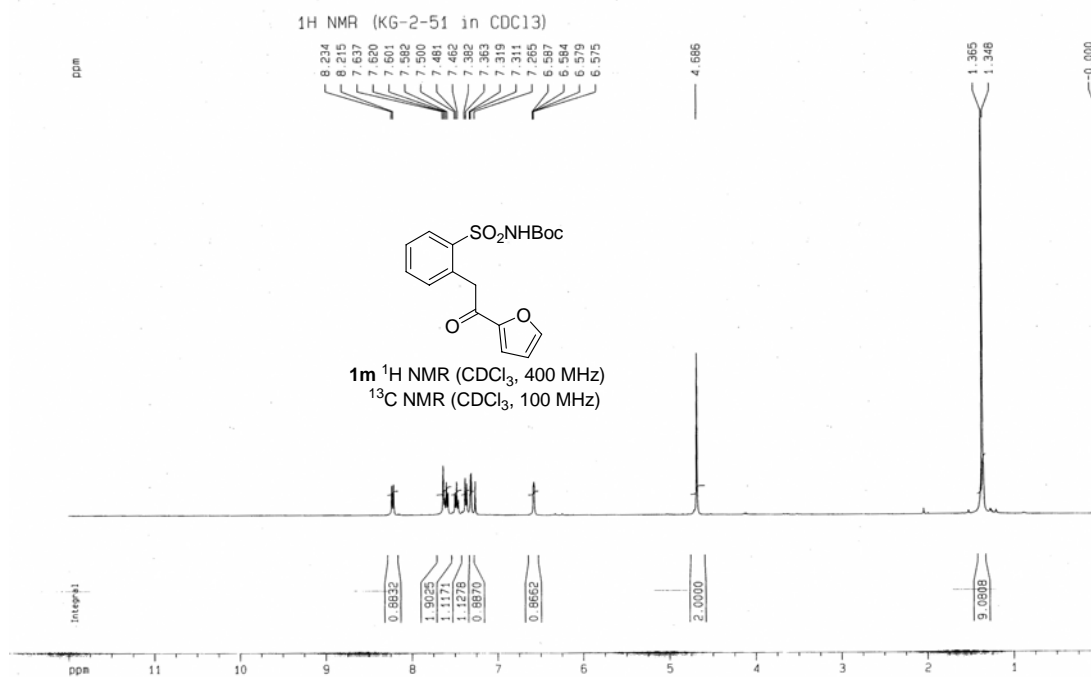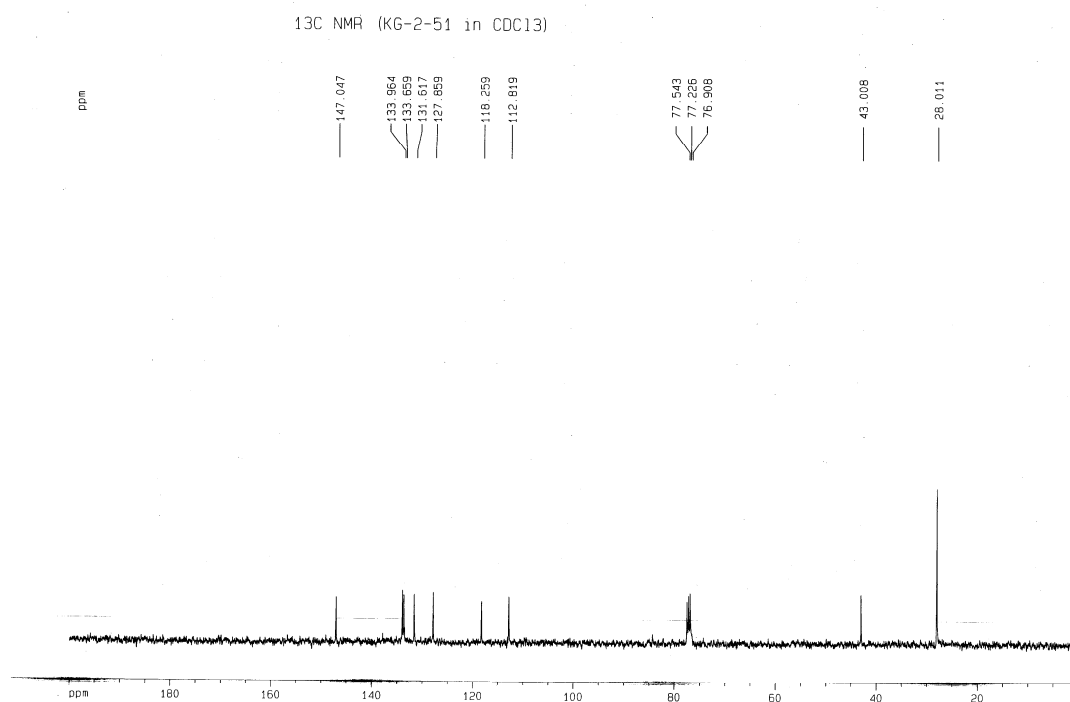

# Elemental Composition Report

Page 1

## Single Mass Analysis

Tolerance = 5.0 PPM / DBE: min = -1.5, max = 100.0

Selected filters: None

Monoisotopic Mass, Even Electron Ions

31 formula(e) evaluated with 1 results within limits (all results (up to 1000) for each mass)

Elements Used:

C: 10-76 H: 10-80 N: 1-3 O: 4-6 Na: 1-1 S: 1-1

KG-2-51

09112005 17 (0.421) AM (Cen,6, 80.00, Ar,5000.0,475.27,0.70,LS 10); Sm (SG, 2x3.00); Sb (1,40.00); Cm (1:22)

1: TOF MS ES+  
2.48e4

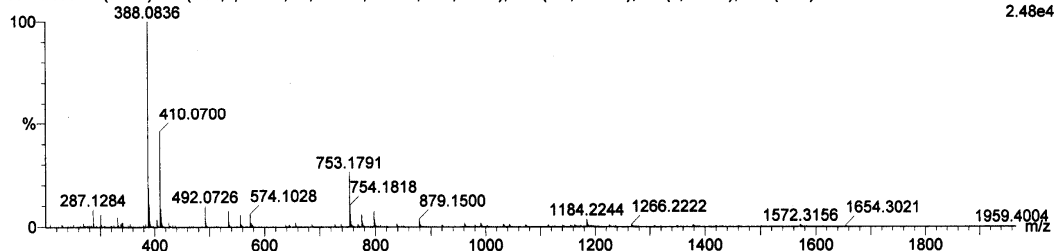

Minimum: -1.5  
Maximum: 100.0

| Mass     | Calc. Mass | mDa | PPM | DBE | i-FIT | Formula           |
|----------|------------|-----|-----|-----|-------|-------------------|
| 388.0836 | 388.0831   | 0.5 | 1.3 | 8.5 | 143.7 | C17 H19 N O6 Na S |

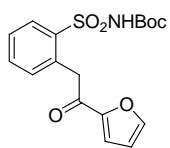

1m HRMS

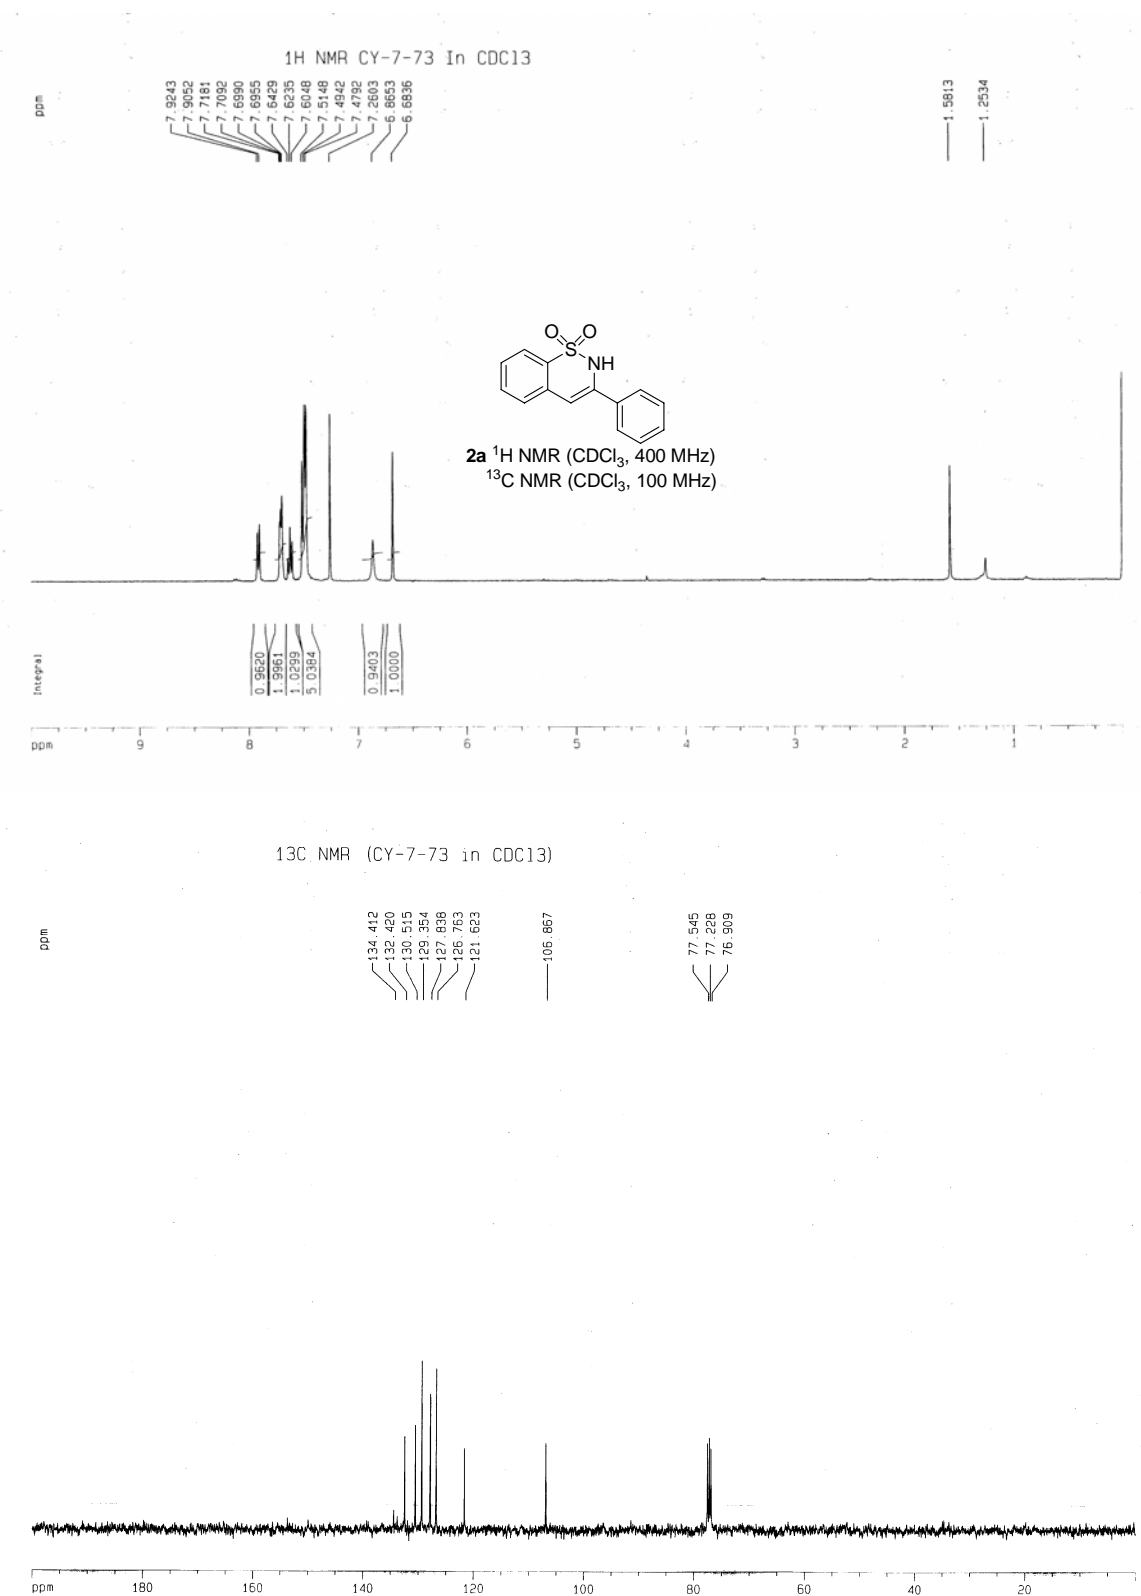

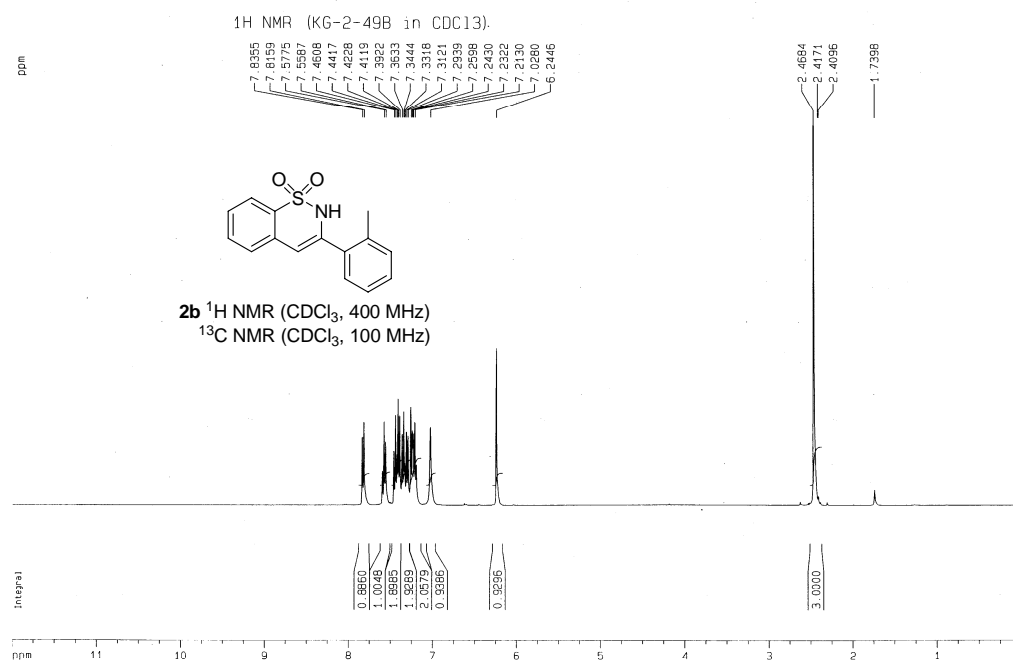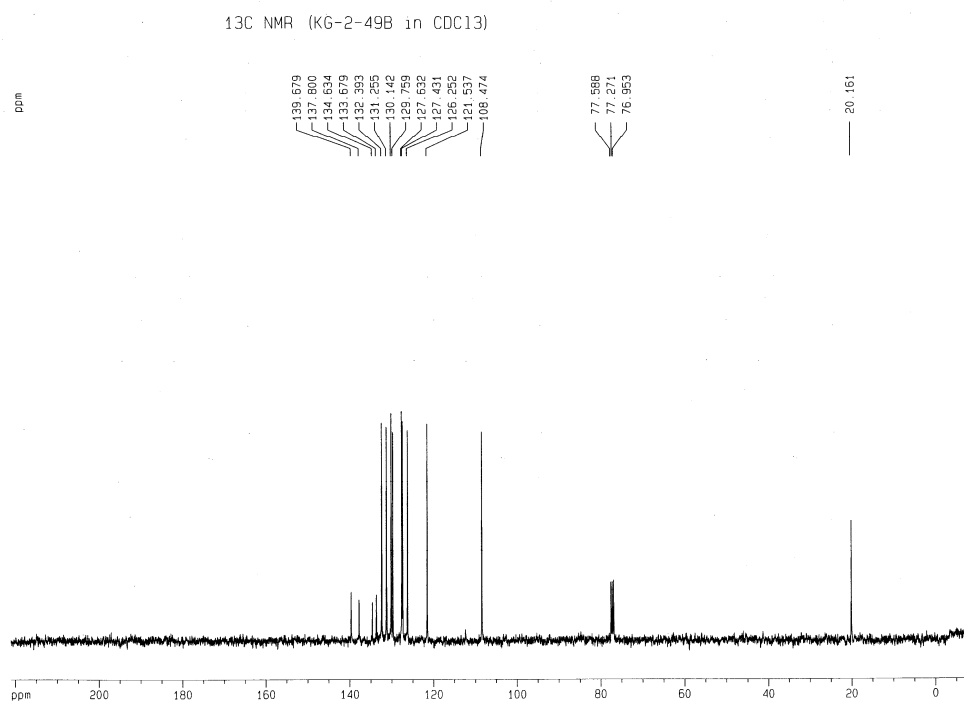

# Elemental Composition Report

Page 1

## Single Mass Analysis

Tolerance = 5.0 PPM / DBE: min = -1.5, max = 100.0

Selected filters: None

Monoisotopic Mass, Odd and Even Electron Ions

1 formula(e) evaluated with 1 results within limits (all results (up to 1000) for each mass)

Elements Used:

C: 10-15 H: 10-15 N: 1-1 O: 2-2 Na: 1-1 S: 1-1

KG-2-49B

09072125 9 (0.233) AM (Cen,6, 80.00, Ar,5000.0,331.24,0.70,LS 10); Sm (SG, 2x3.00); Sb (1,40.00); Cm (1:12)

1: TOF MS ES+  
2.01e3

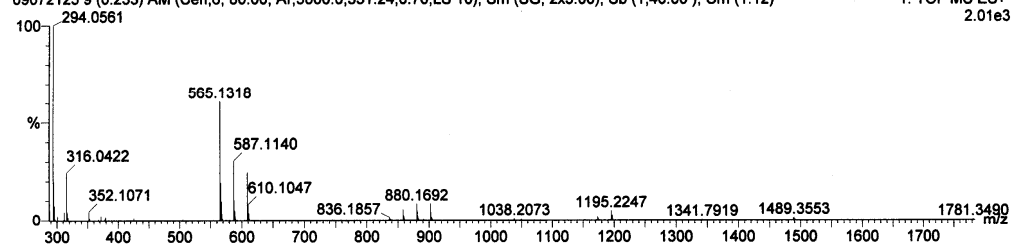

Minimum: -1.5  
Maximum: 5.0 5.0 100.0

| Mass     | Calc. Mass | mDa  | PPM  | DBE | i-FIT | Formula           |
|----------|------------|------|------|-----|-------|-------------------|
| 294.0561 | 294.0565   | -0.4 | -1.4 | 9.5 | 1.9   | C15 H13 N O2 Na S |

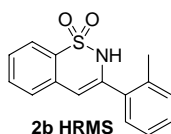

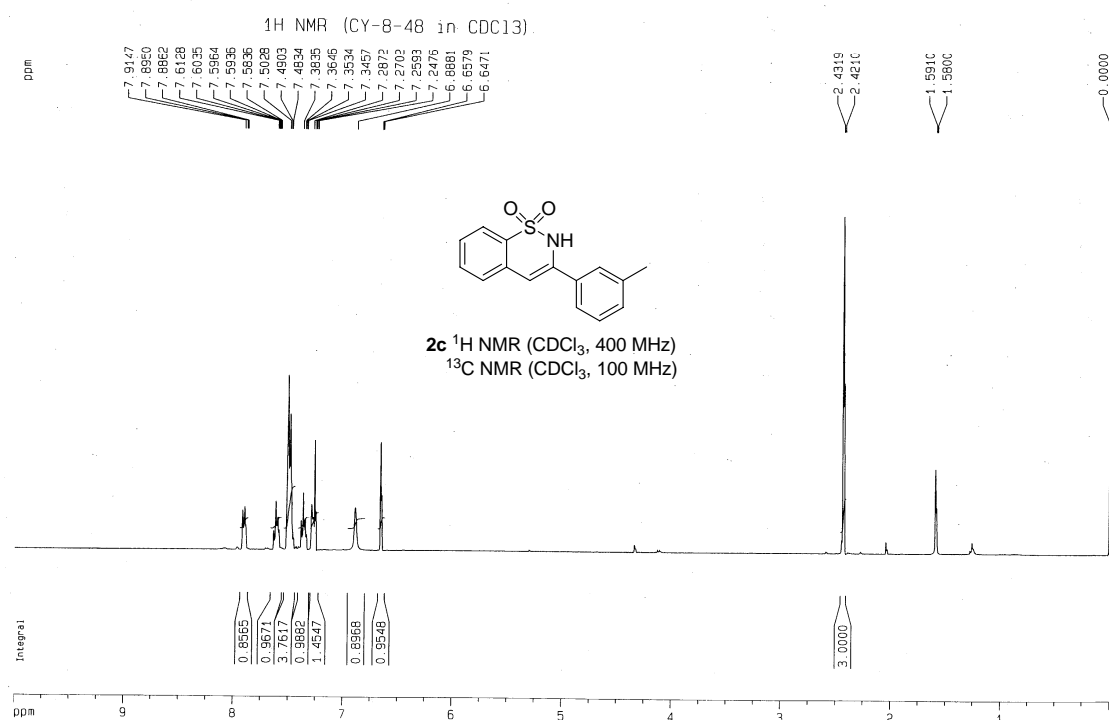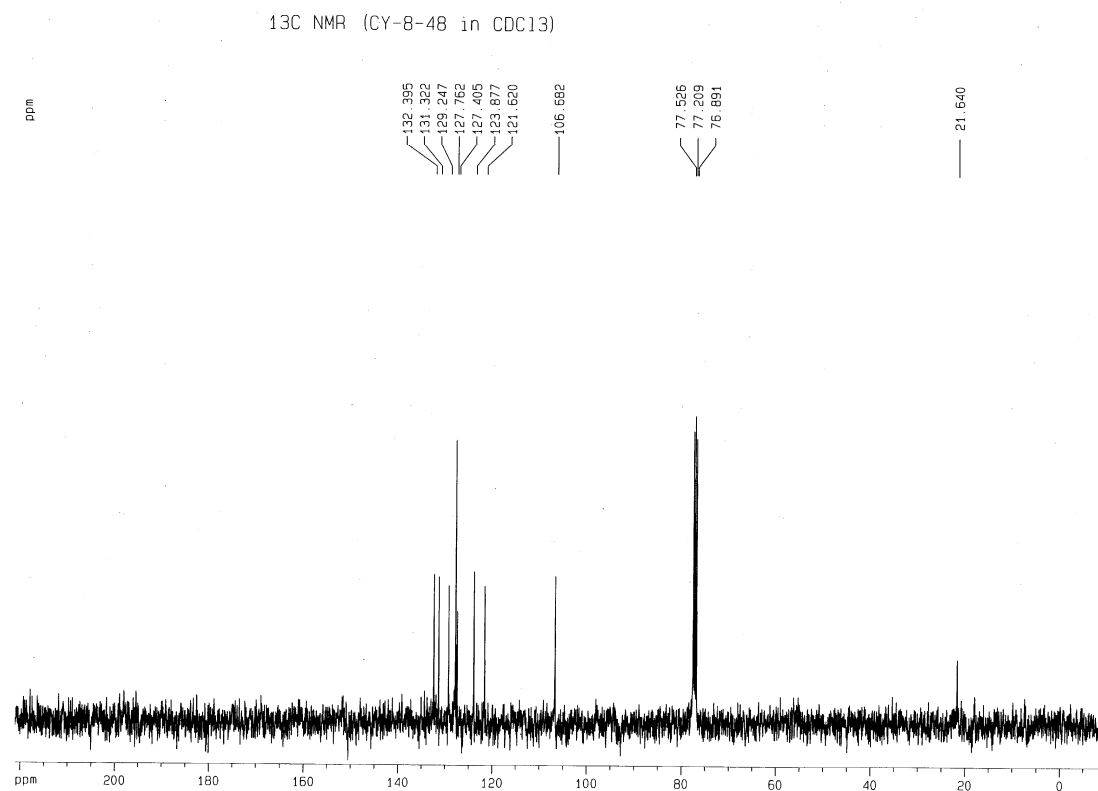



# Elemental Composition Report

Page 1

## Single Mass Analysis

Tolerance = 5.0 PPM / DBE: min = -1.5, max = 100.0

Selected filters: None

Monoisotopic Mass, Odd and Even Electron Ions

1 formula(e) evaluated with 1 results within limits (all results (up to 1000) for each mass)

Elements Used:

C: 10-15 H: 10-15 N: 1-1 O: 2-3 Na: 1-1 S: 1-1

CY-8-48

09072127 92 (2.319) AM (Cen,6, 80.00, Ar,5000.0,331.24,0.70,LS 10); Sm (SG, 2x3.00); Sb (1,40.00 ); Cm (91:117)

1: TOF MS ES+  
4.48e3

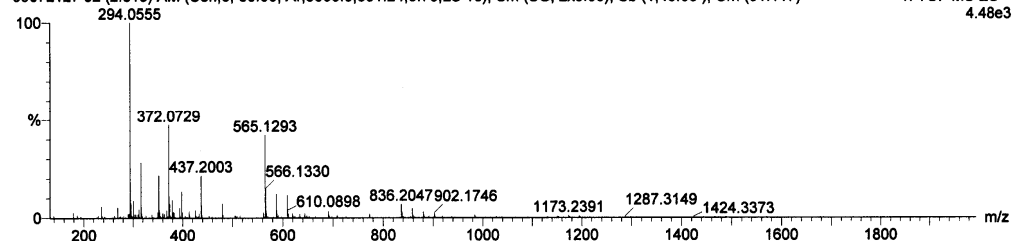

Minimum: -1.5  
Maximum: 5.0 5.0 100.0

| Mass     | Calc. Mass | mDa  | PPM  | DBE | i-FIT | Formula           |
|----------|------------|------|------|-----|-------|-------------------|
| 294.0555 | 294.0565   | -1.0 | -3.4 | 9.5 | 1.6   | C15 H13 N O2 Na S |

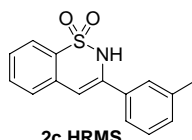

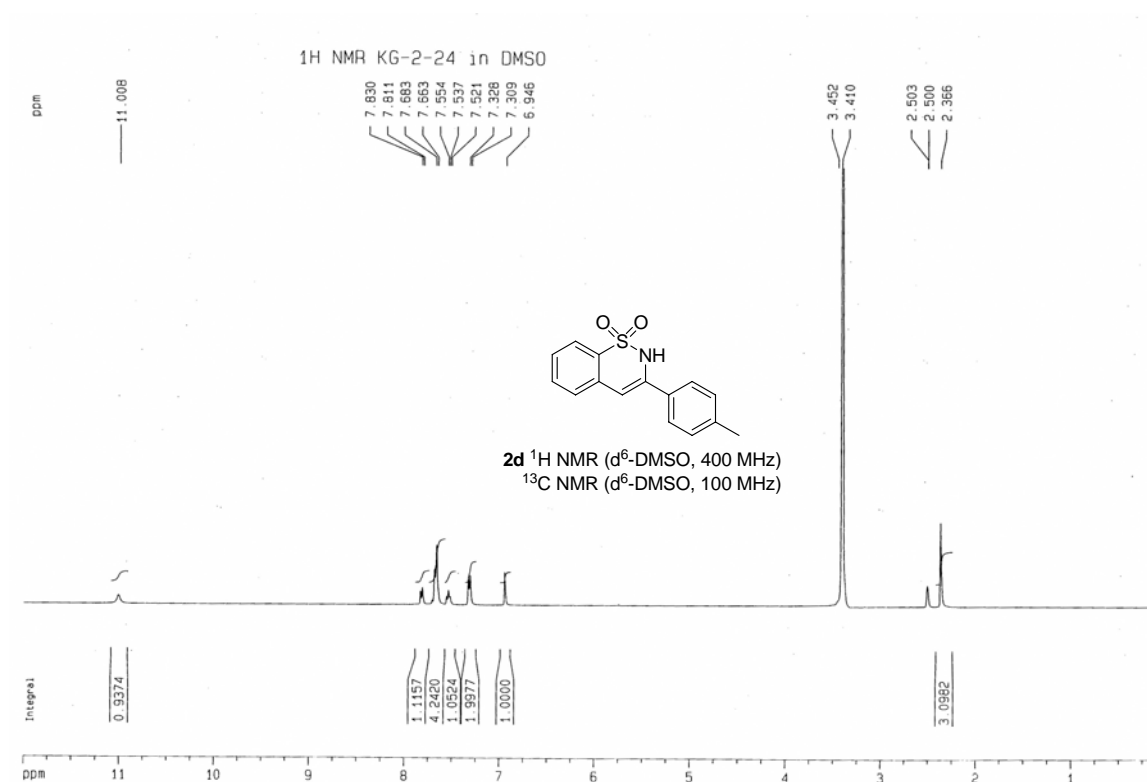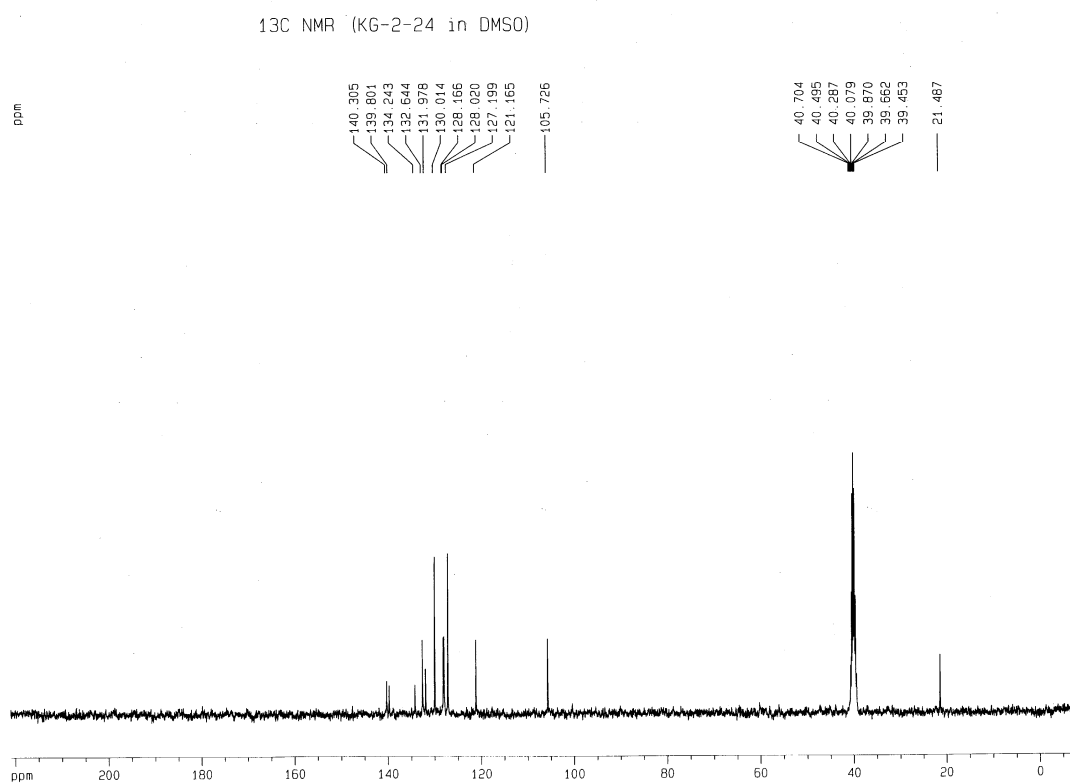

# Elemental Composition Report

Page 1

## Single Mass Analysis

Tolerance = 5.0 PPM / DBE: min = -1.5, max = 100.0

Selected filters: None

Monoisotopic Mass, Odd and Even Electron Ions

1 formula(e) evaluated with 1 results within limits (all results (up to 1000) for each mass)

Elements Used:

C: 10-15 H: 10-15 N: 1-1 O: 2-2 Na: 1-1 S: 1-1

KG-2-24

09072108 18 (0.441) AM (Cen,6, 80.00, Ar,5000.0,331.24,0.70,LS 10); Sm (SG, 2x3.00); Sb (1,40.00); Cm (15:22)

1: TOF MS ES+  
5.17e3

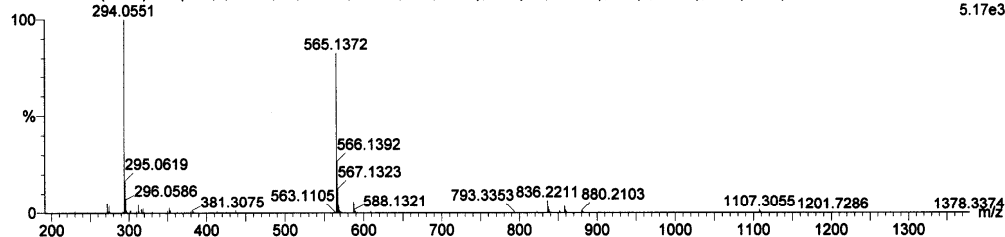

Minimum: -1.5  
Maximum: 5.0 5.0 100.0

| Mass     | Calc. Mass | mDa  | PPM  | DBE | i-FIT | Formula           |
|----------|------------|------|------|-----|-------|-------------------|
| 294.0551 | 294.0565   | -1.4 | -4.8 | 9.5 | 5.9   | C15 H13 N O2 Na S |

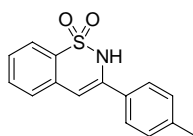

2d HRMS

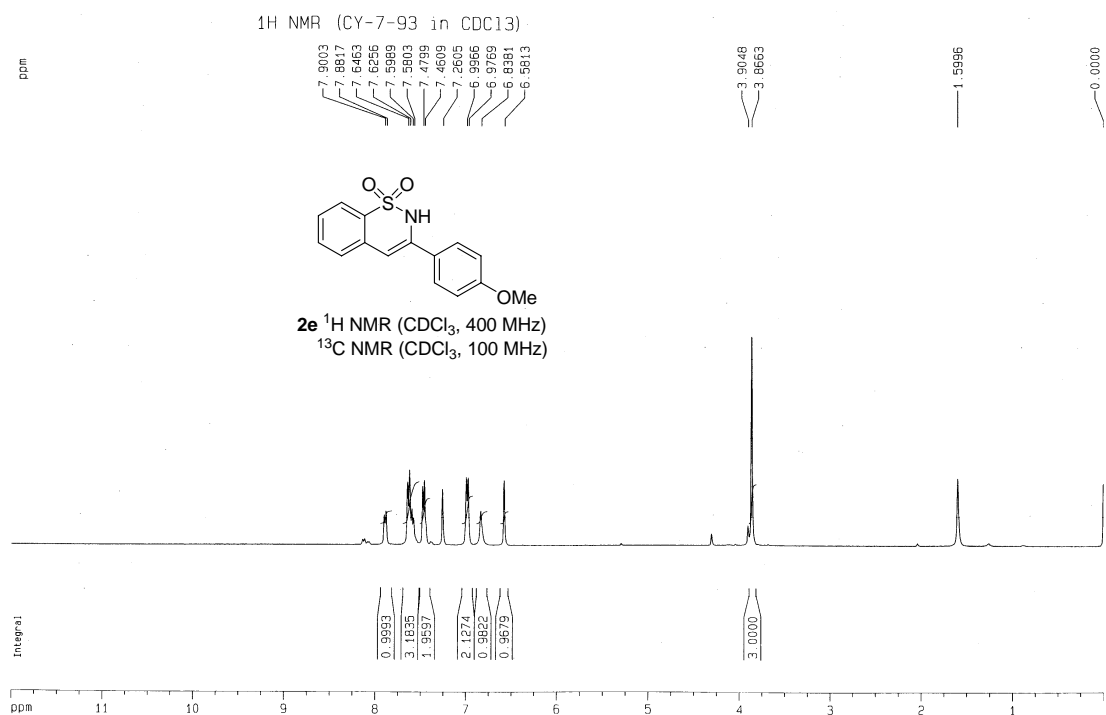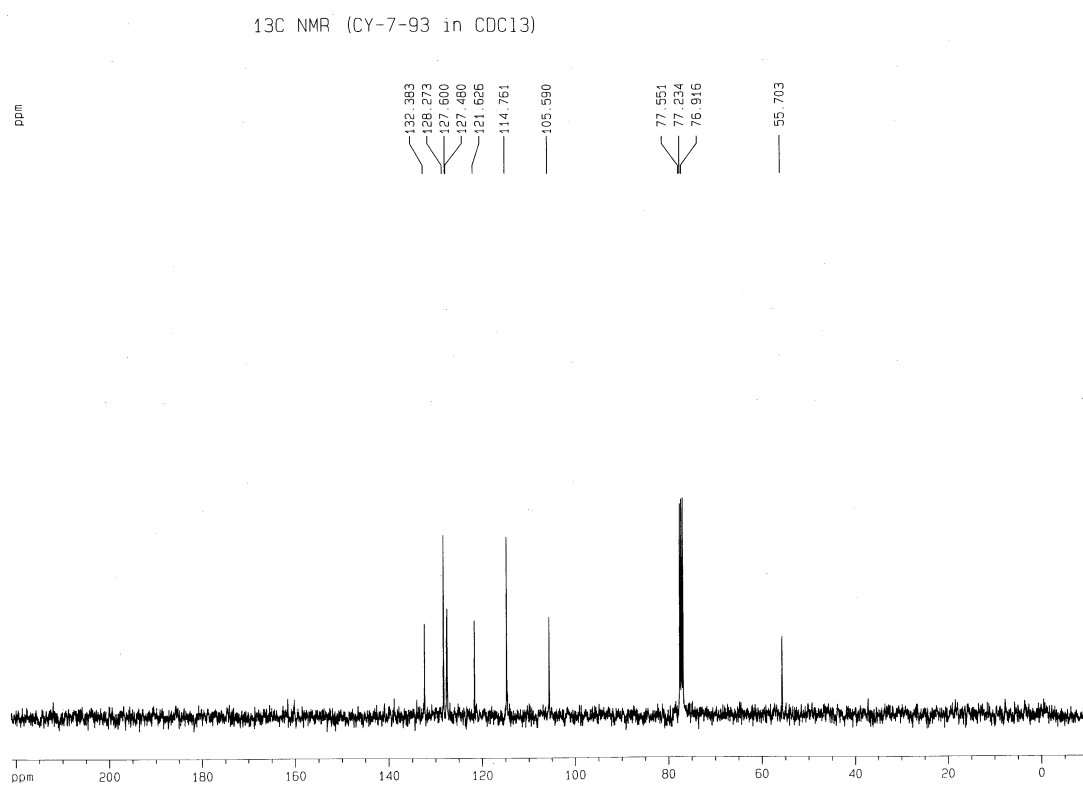

# Elemental Composition Report

Page 1

## Single Mass Analysis

Tolerance = 5.0 PPM / DBE: min = -1.5, max = 100.0

Selected filters: None

Monoisotopic Mass, Odd and Even Electron Ions

1 formula(e) evaluated with 1 results within limits (all results (up to 1000) for each mass)

Elements Used:

C: 10-15 H: 10-15 N: 1-1 O: 2-3 Na: 1-1 S: 1-1

CY-7-93

09072126 31 (0.812) AM (Cen,6, 80.00, Ar,5000.0,331.24,0.70,LS 10); Sm (SG, 2x3.00); Sb (1,40.00); Cm (23:33)

1: TOF MS ES+  
9.13e3

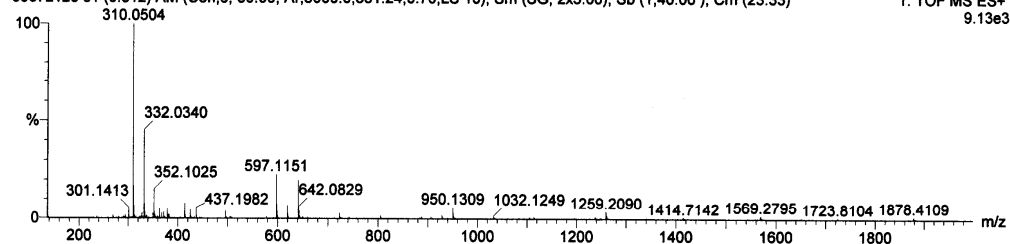

Minimum:  
Maximum:

5.0      5.0      -1.5  
100.0

| Mass     | Calc. Mass | mDa  | PPM  | DBE | i-FIT | Formula           |
|----------|------------|------|------|-----|-------|-------------------|
| 310.0504 | 310.0514   | -1.0 | -3.2 | 9.5 | 4.6   | C15 H13 N O3 Na S |

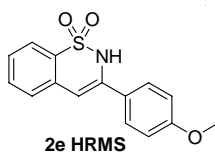

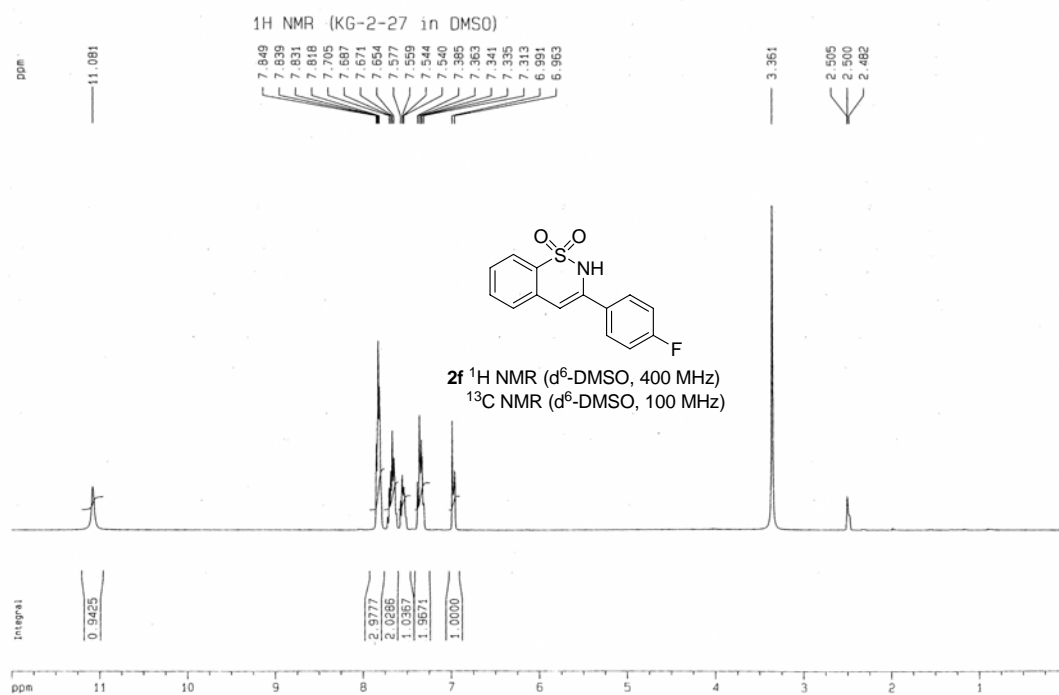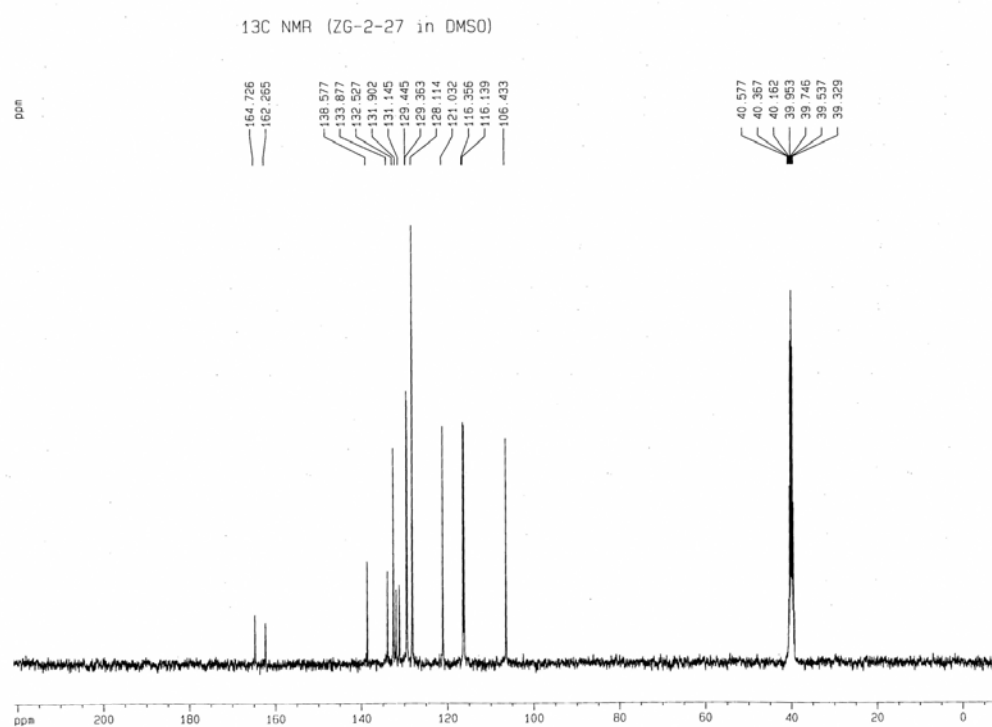

# Elemental Composition Report

Page 1

## Single Mass Analysis

Tolerance = 5.0 PPM / DBE: min = -1.5, max = 100.0

Selected filters: None

Monoisotopic Mass, Even Electron Ions

1 formula(e) evaluated with 1 results within limits (all results (up to 1000) for each mass)

Elements Used:

C: 10-15 H: 10-15 N: 1-1 O: 2-2 F: 1-1 Na: 1-1 S: 1-1

KG-2.27

09072115 58 (1.484) AM (Cen,6, 80.00, Ar,5000.0,331.24,0.70,LS 10); Sm (SG, 2x3.00); Sb (1,40.00); Cm (57:59)

1: TOF MS ES+  
1.77e3

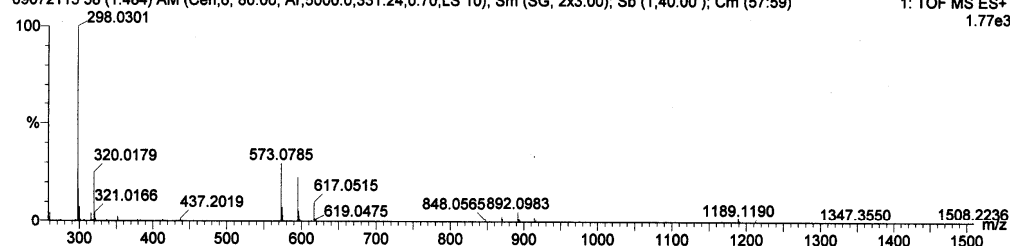

Minimum:

Maximum:

5.0

5.0

-1.5  
100.0

| Mass     | Calc. Mass | mDa  | PPM  | DBE | i-FIT | Formula             |
|----------|------------|------|------|-----|-------|---------------------|
| 298.0301 | 298.0314   | -1.3 | -4.4 | 9.5 | 2.4   | C14 H10 N O2 F Na S |

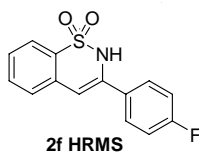

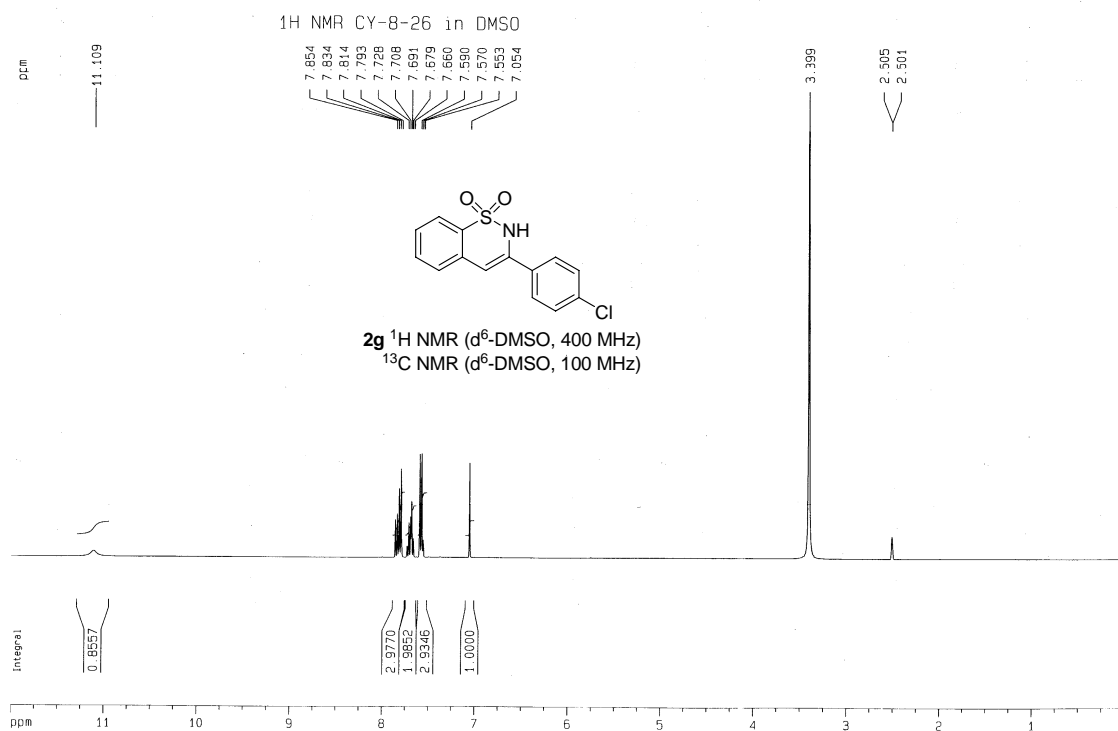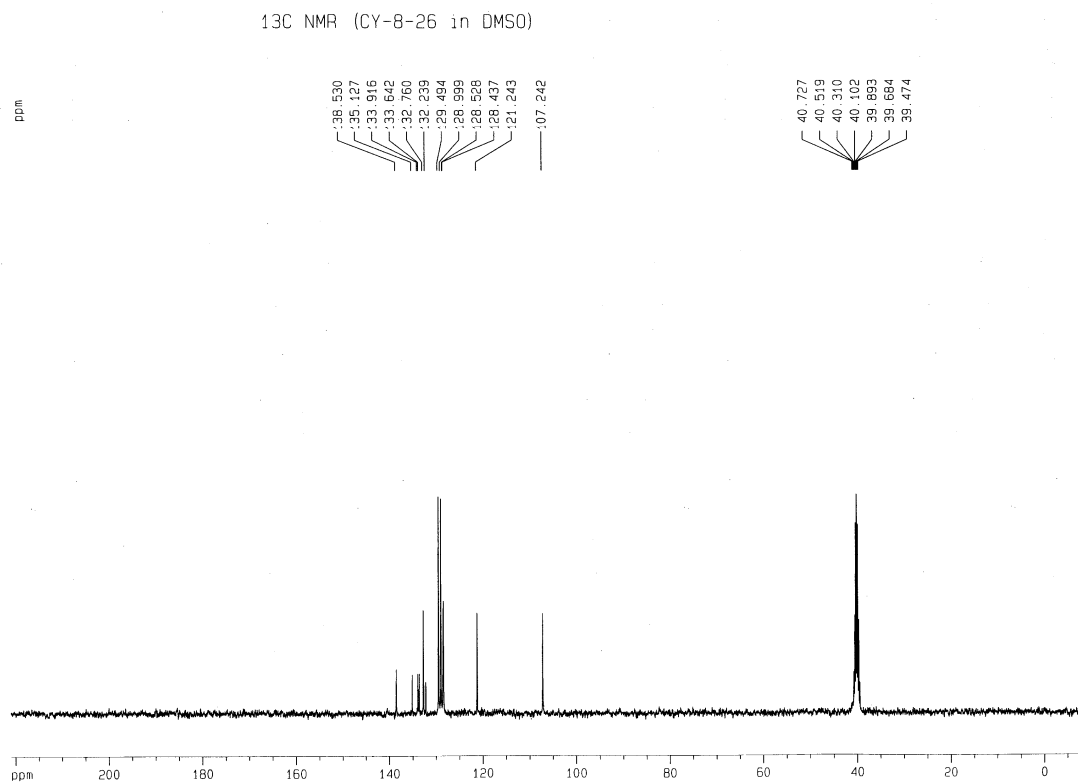



# Elemental Composition Report

Page 1

## Single Mass Analysis

Tolerance = 5.0 PPM / DBE: min = -1.5, max = 100.0

Selected filters: None

Monoisotopic Mass, Odd and Even Electron Ions

1 formula(e) evaluated with 1 results within limits (all results (up to 1000) for each mass)

Elements Used:

C: 10-15 H: 10-15 N: 1-1 O: 2-2 Na: 1-1 S: 1-1 Cl: 1-1

CY-8-26

09072113 12 (0.288) AM (Cen,6, 80.00, Ar,5000.0,331.24,0.70,LS 10); Sm (SG, 2x3.00); Sb (1,40.00); Cm (1:12)

1: TOF MS ES+  
9.74e3

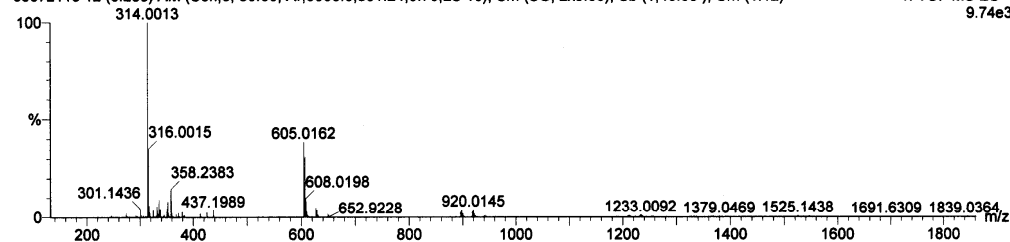

Minimum: -1.5  
Maximum: 5.0 5.0 100.0

| Mass     | Calc. Mass | mDa  | PPM  | DBE | i-FIT | Formula              |
|----------|------------|------|------|-----|-------|----------------------|
| 314.0013 | 314.0018   | -0.5 | -1.6 | 9.5 | 24.1  | C14 H10 N O2 Na S Cl |

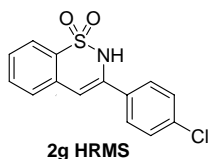

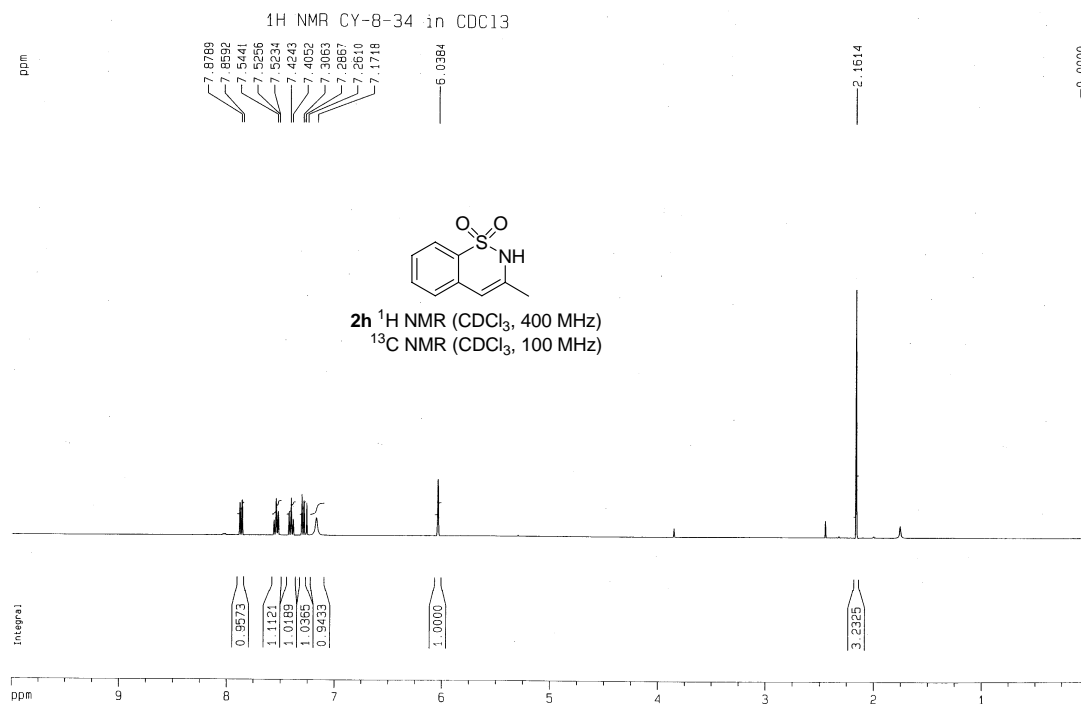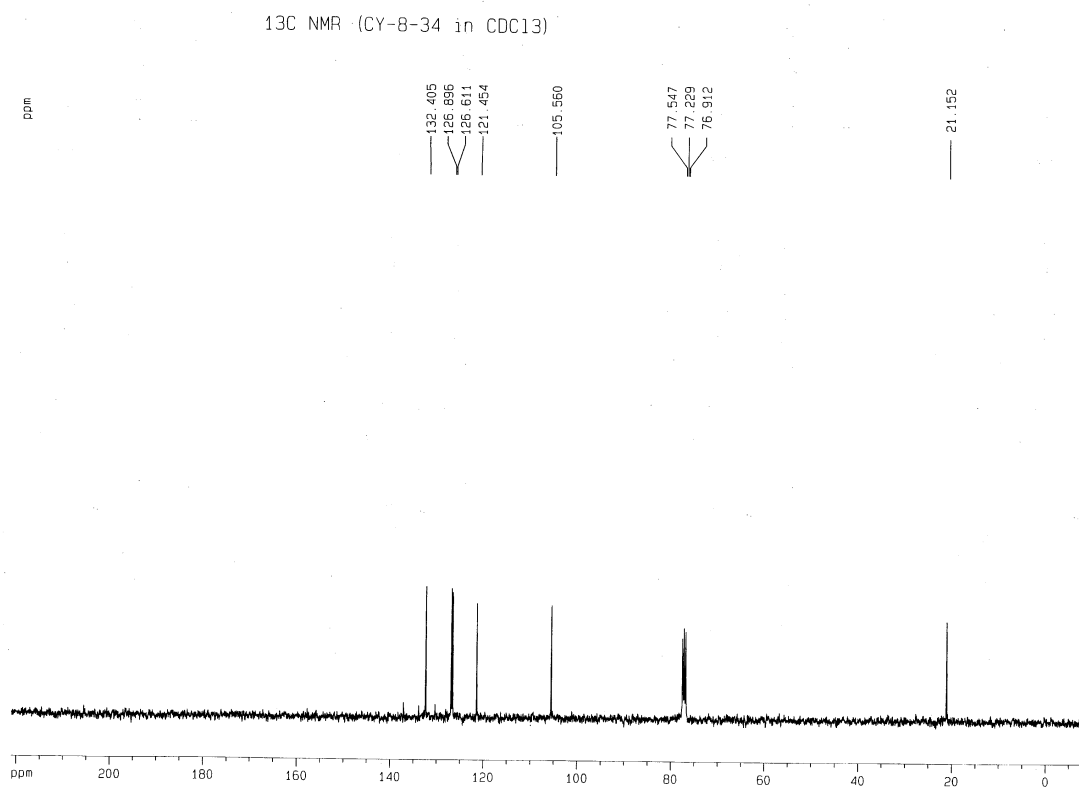

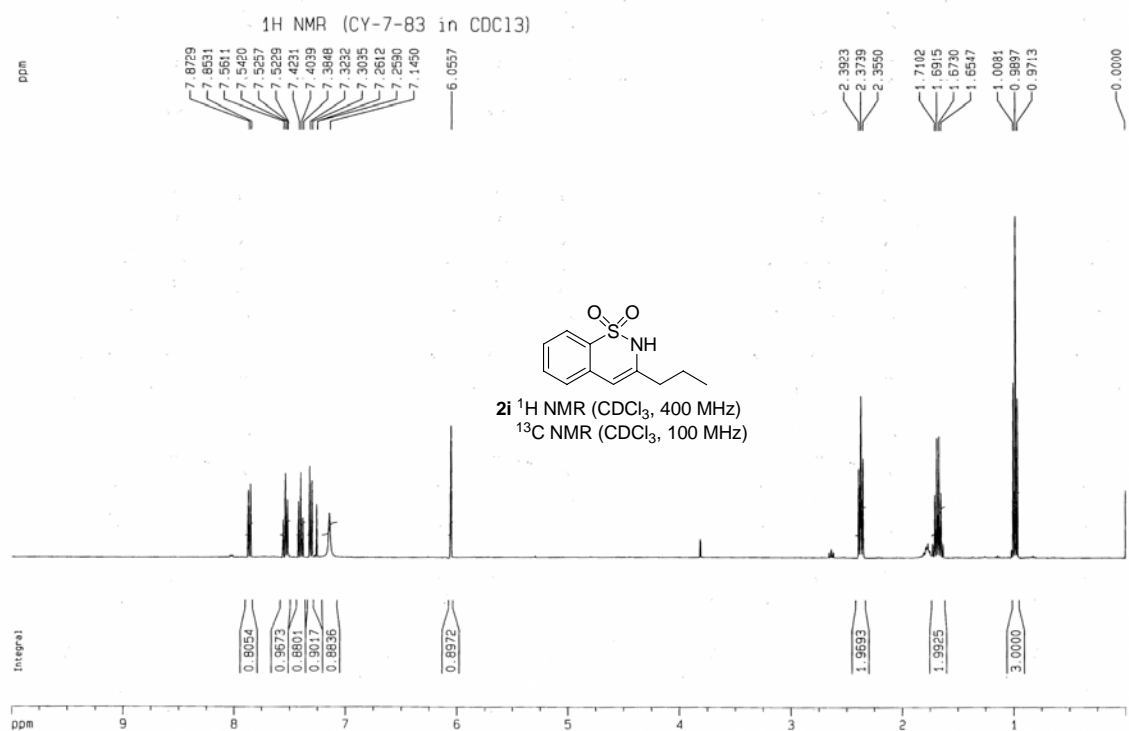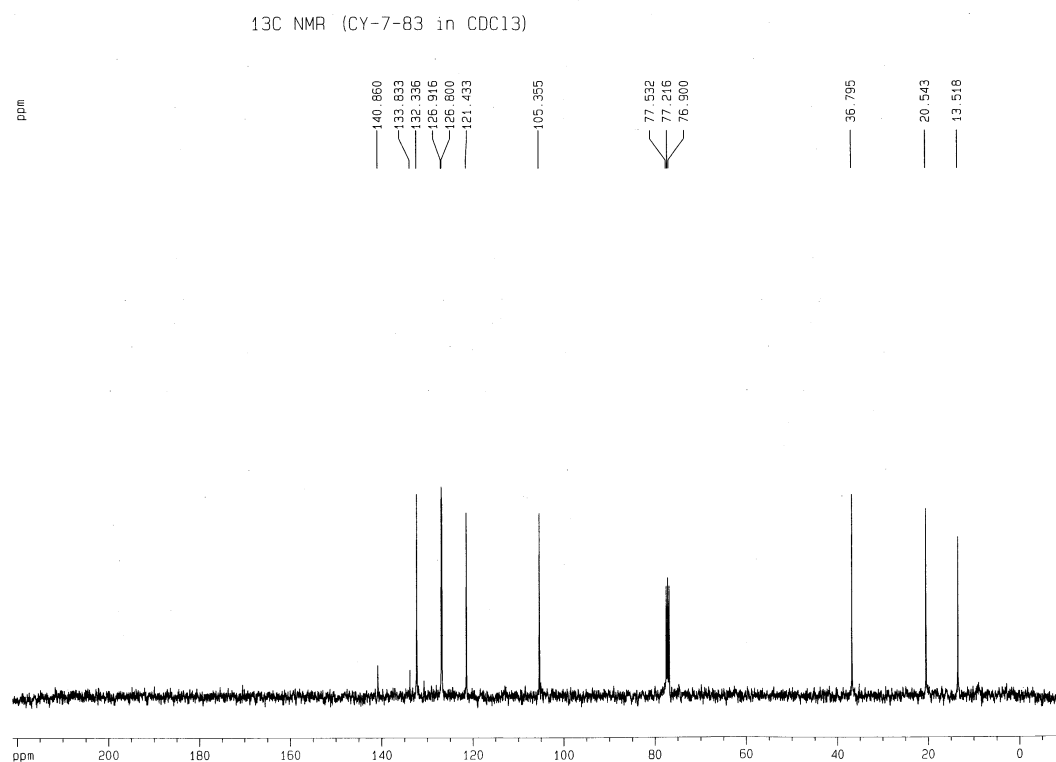

# Elemental Composition Report

Page 1

## Single Mass Analysis

Tolerance = 5.0 PPM / DBE: min = -1.5, max = 100.0

Selected filters: None

Monoisotopic Mass, Odd and Even Electron Ions

2 formula(e) evaluated with 1 results within limits (all results (up to 1000) for each mass)

Elements Used:

C: 10-20 H: 10-20 N: 1-2 O: 2-2 Na: 1-1 S: 1-1

CY-7-83

09091607 76 (1.942) AM (Cen,6, 80.00, Ar,5000.0,475.27,0.70,LS 10); Sm (SG, 2x3.00); Sb (1,40.00 ); Cm (73:84)

1: TOF MS ES+  
3.37e3

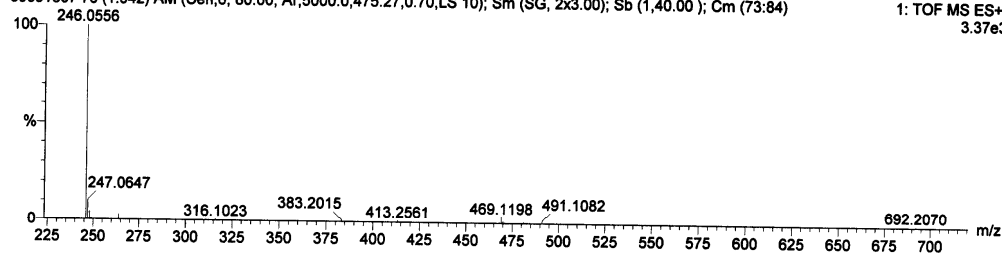

Minimum:

Maximum: 5.0 5.0 -1.5

| Mass     | Calc. Mass | mDa  | PPM  | DBE | i-FIT | Formula           |
|----------|------------|------|------|-----|-------|-------------------|
| 246.0556 | 246.0565   | -0.9 | -3.7 | 5.5 | 24.2  | C11 H13 N O2 Na S |

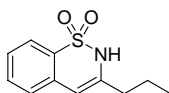

2i HRMS

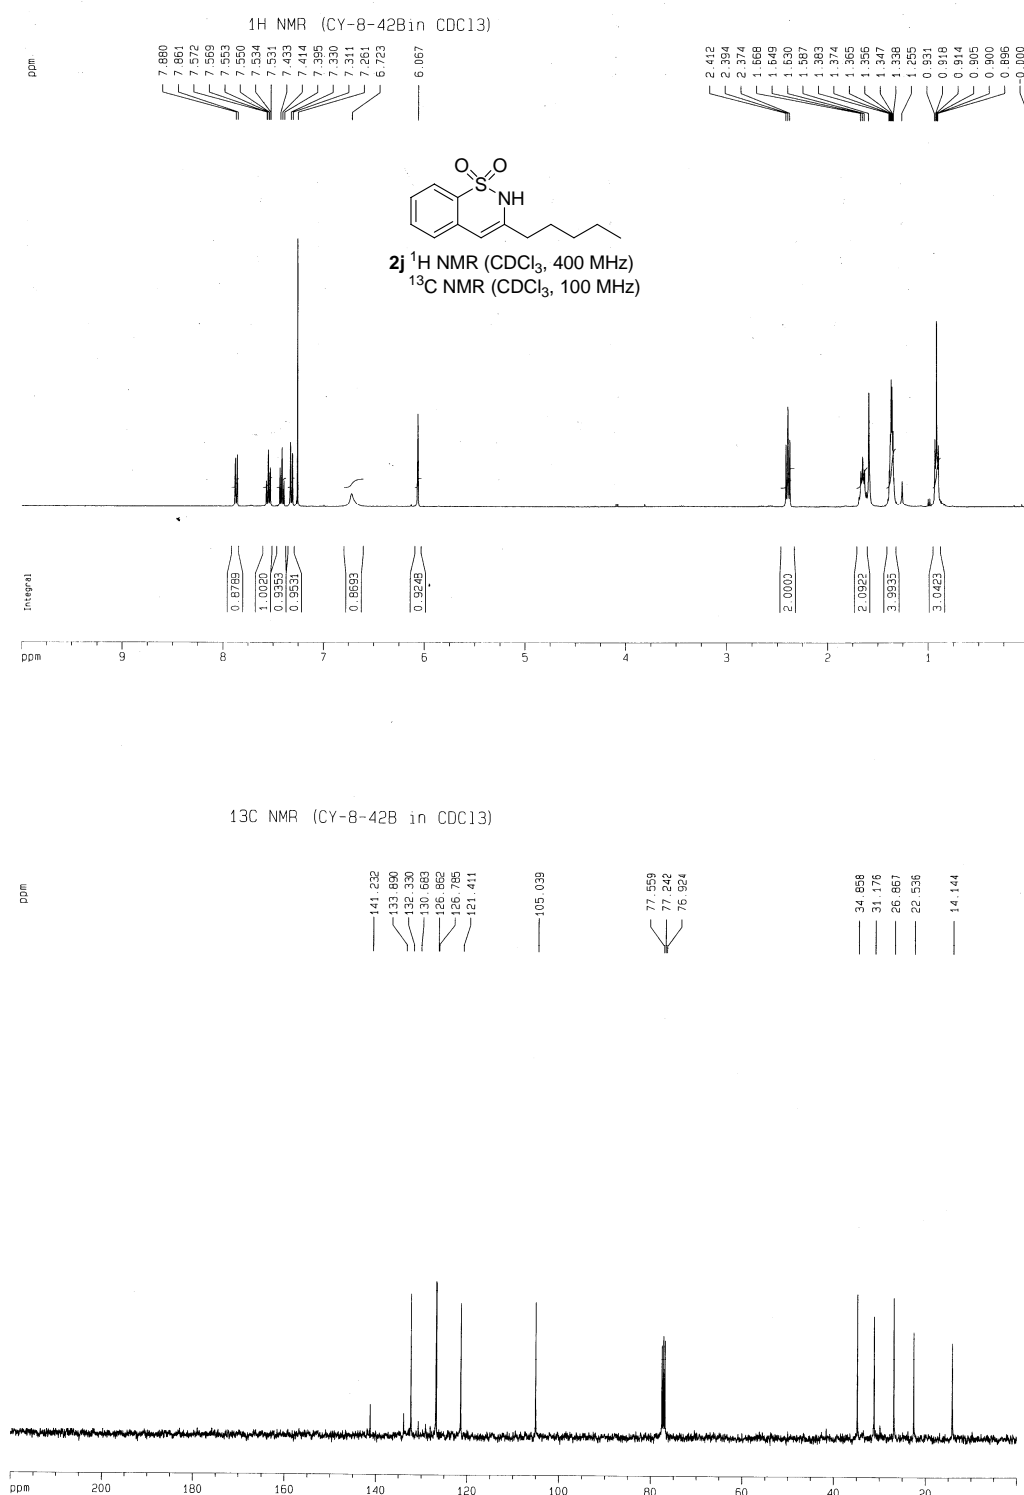

# Elemental Composition Report

Page 1

## Single Mass Analysis

Tolerance = 5.0 PPM / DBE: min = -1.5, max = 100.0

Selected filters: None

Monoisotopic Mass, Odd and Even Electron Ions

2 formula(e) evaluated with 1 results within limits (all results (up to 1000) for each mass)

Elements Used:

C: 10-20 H: 10-20 N: 1-2 O: 2-2 Na: 1-1 S: 1-1

CY-428

09091600 6 (0.135) AM (Cen,6, 80.00, Ar,5000.0,475.27,0.70,LS 10); Sm (SG, 2x3.00); Sb (1,40.00); Cm (1:6)

1: TOF MS ES+  
3.33e3

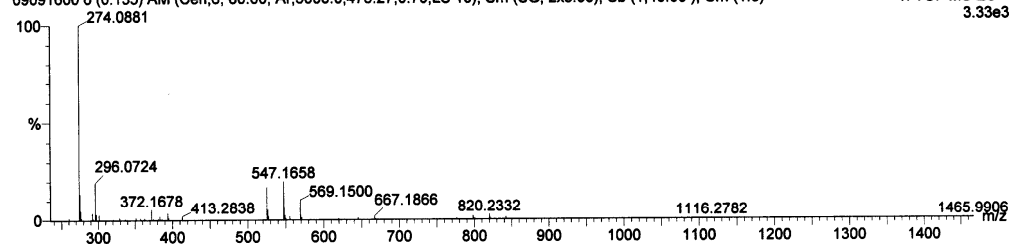

Minimum: -1.5  
Maximum: 100.0

| Mass     | Calc. Mass | mDa | PPM | DBE | i-FIT | Formula           |
|----------|------------|-----|-----|-----|-------|-------------------|
| 274.0881 | 274.0878   | 0.3 | 1.1 | 5.5 | 10.8  | C13 H17 N O2 Na S |

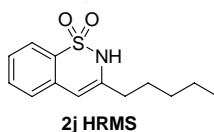

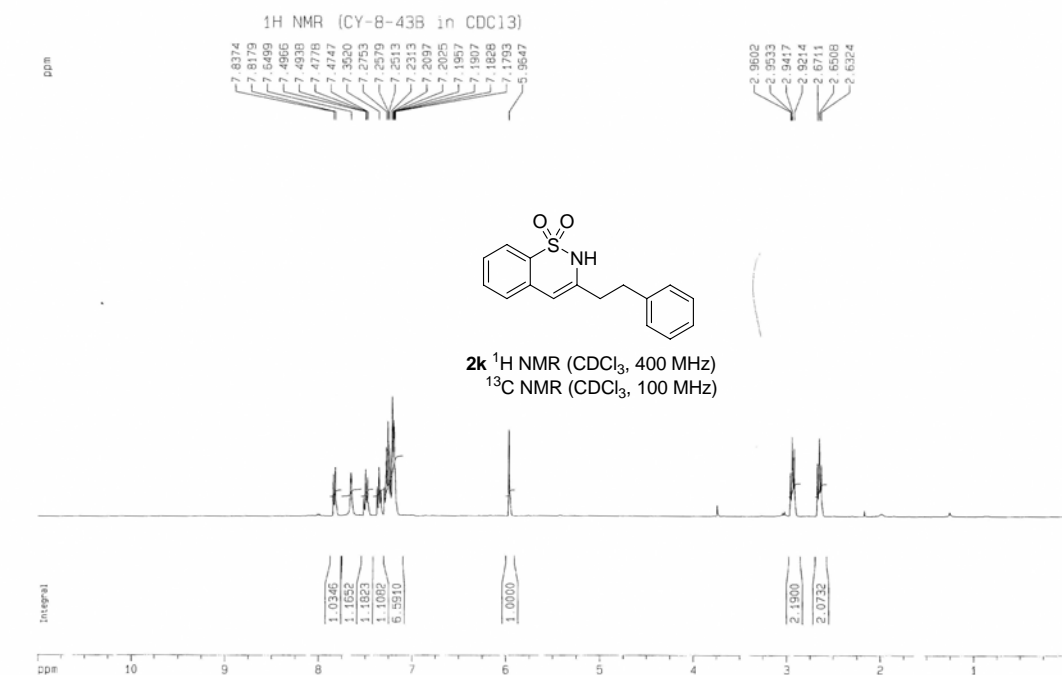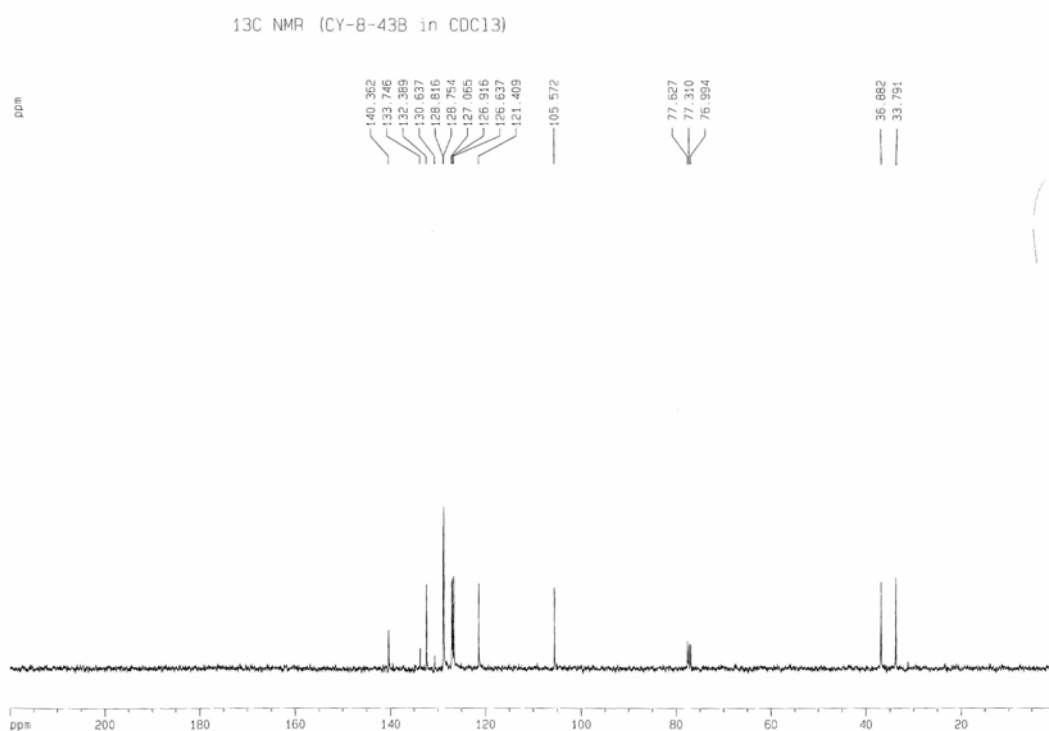

# Elemental Composition Report

Page 1

## Single Mass Analysis

Tolerance = 50.0 PPM / DBE: min = -10.0, max = 100.0

Selected filters: None

Monoisotopic Mass, Even Electron Ions

5 formula(e) evaluated with 1 results within limits (all results (up to 1000) for each mass)

Elements Used:

C: 0-90 H: 0-120 N: 1-1 O: 2-2 S: 1-1

CY-8-43B

10071805 31 (0.811) AM (Cen,6, 80.00, Ar,5000.0,429.20,0.70,LS 10); Sm (SG, 2x3.00); Sb (1,40.00); Cm (31:34)

1: TOF MS ES+  
2.22e3

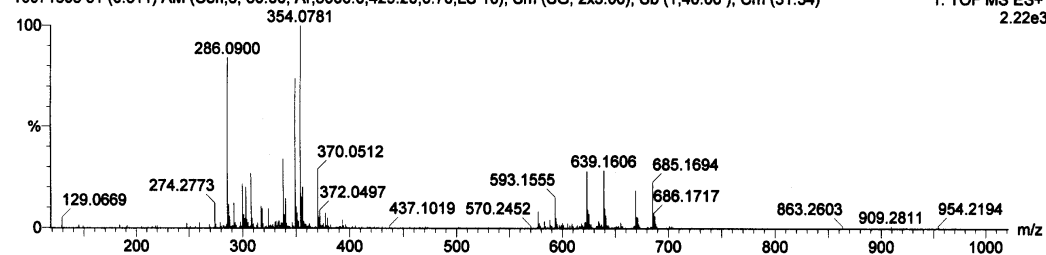

Minimum: -10.0  
Maximum: 5.0 50.0 100.0

| Mass     | Calc. Mass | mDa  | PPM  | DBE | i-FIT | Formula        |
|----------|------------|------|------|-----|-------|----------------|
| 286.0900 | 286.0902   | -0.2 | -0.7 | 9.5 | 17.5  | C16 H16 N O2 S |

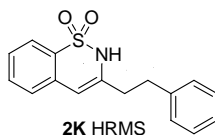



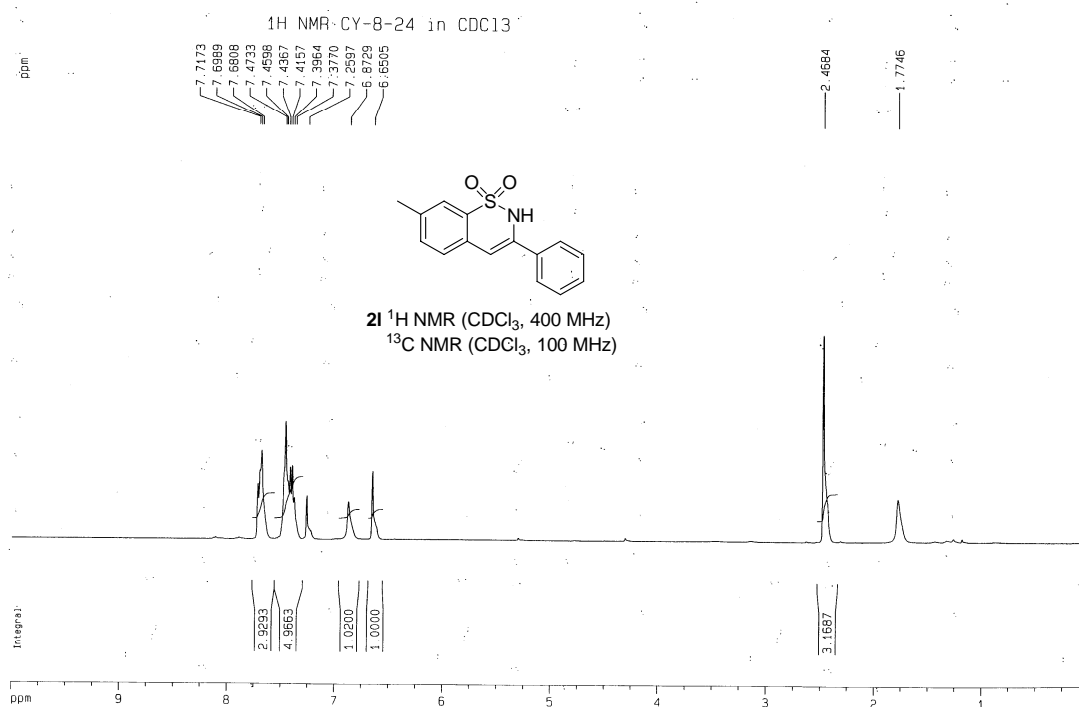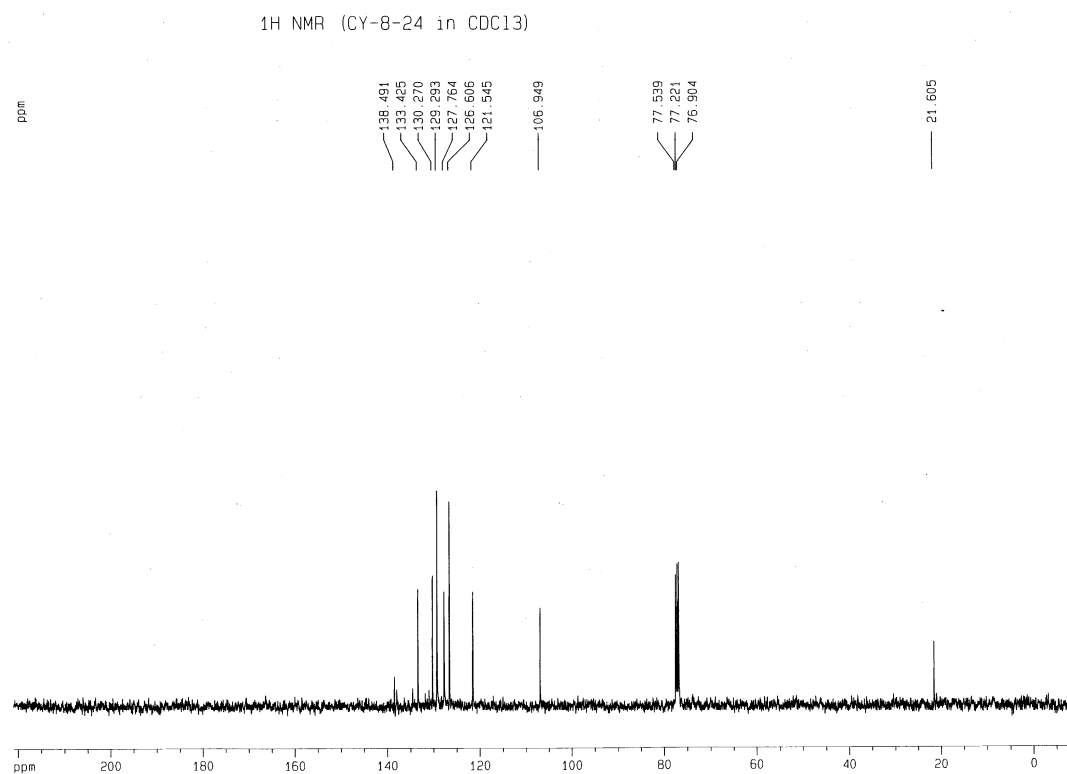

# Elemental Composition Report

Page 1

## Single Mass Analysis

Tolerance = 50.0 PPM / DBE: min = -1.5, max = 100.0

Selected filters: None

Monoisotopic Mass, Even Electron Ions

2 formula(e) evaluated with 1 results within limits (all results (up to 1000) for each mass)

Elements Used:

C: 10-20 H: 10-20 N: 1-2 O: 2-2 Na: 1-1 S: 1-1

CY-8-24

09091605 20 (0.521) AM (Cen,6, 80.00, Ar,5000.0,475.27,0.70,LS 10); Sm (SG, 2x3.00); Sb (1,40.00); Cm (1:20)

1: TOF MS ES+  
1.42e4

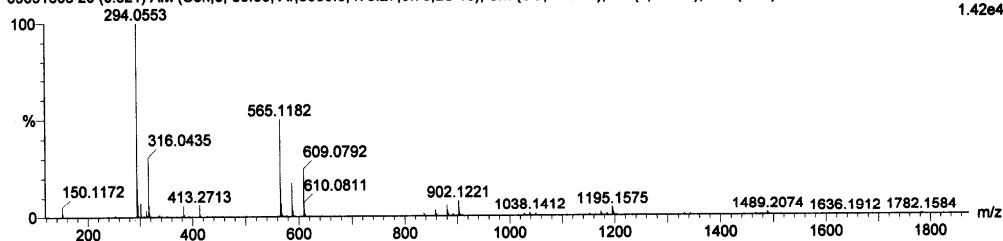

Minimum: -1.5  
Maximum: 5.0 50.0 100.0

| Mass     | Calc. Mass | mDa  | PPM  | DBE | i-FIT | Formula           |
|----------|------------|------|------|-----|-------|-------------------|
| 294.0553 | 294.0565   | -1.2 | -4.1 | 9.5 | 43.0  | C15 H13 N O2 Na S |

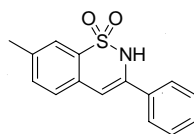

2I HRMS

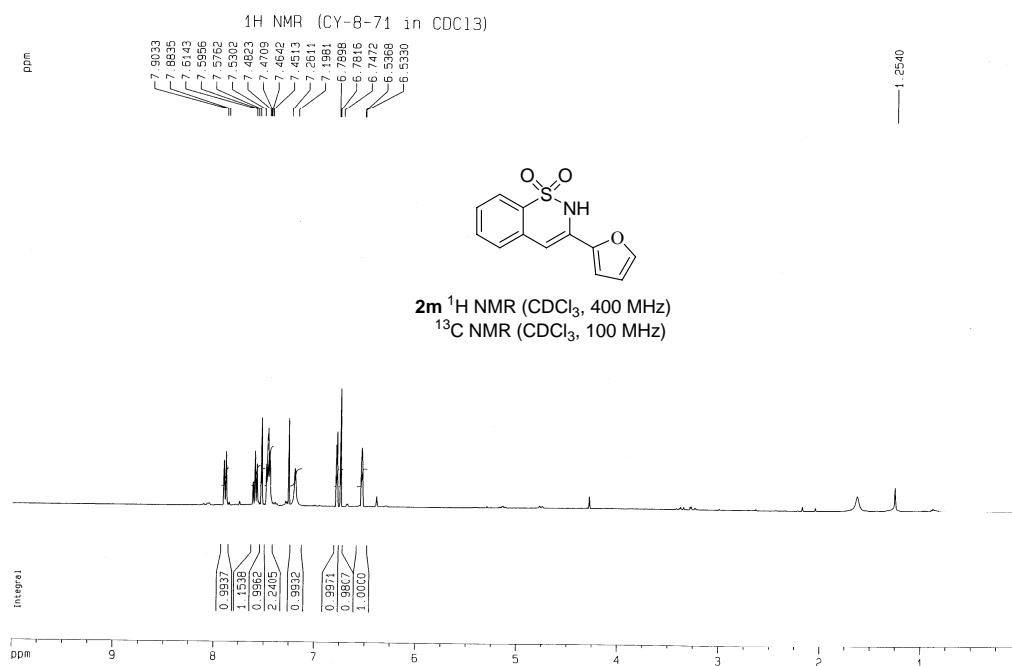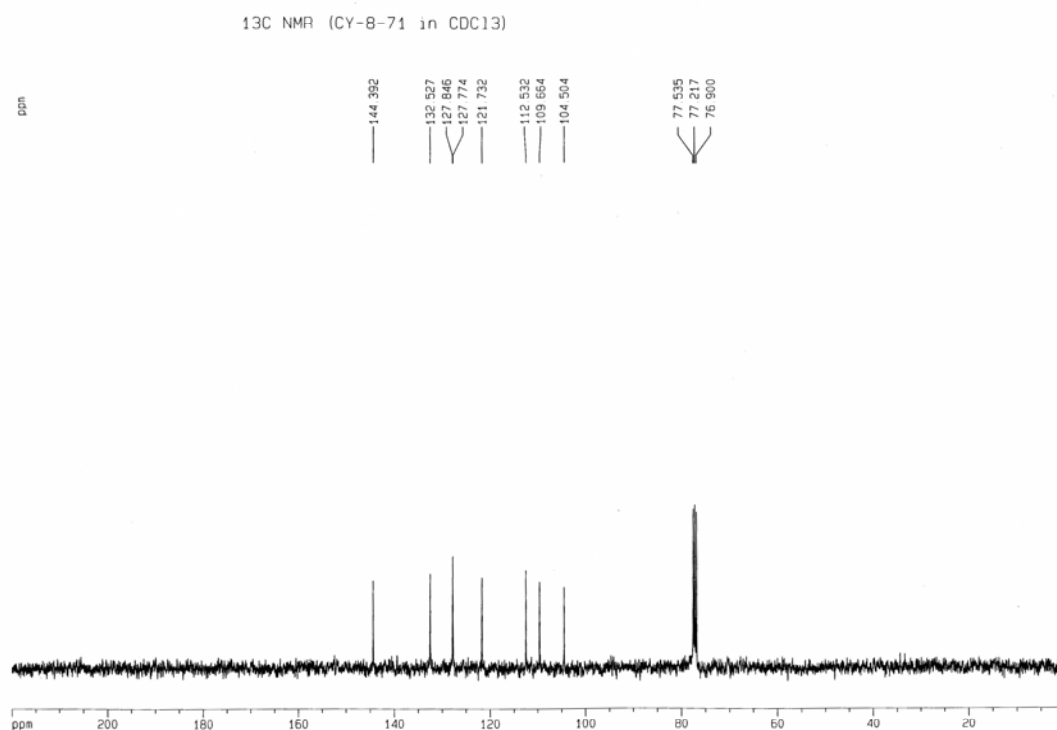

# Elemental Composition Report

Page 1

## Single Mass Analysis

Tolerance = 50.0 PPM / DBE: min = -10.0, max = 100.0

Selected filters: None

Monoisotopic Mass, Even Electron Ions

4 formula(e) evaluated with 1 results within limits (all results (up to 1000) for each mass)

Elements Used:

C: 0-90 H: 0-120 N: 1-1 O: 3-3 S: 1-1

CY-8-71

10071804 5 (0.116) AM (Cen,6, 80.00, Ar,5000.0,429.20,0.70,LS 10); Sm (SG, 2x3.00); Sb (1,40.00); Cm (1:8)

1: TOF MS ES+  
5.30e3

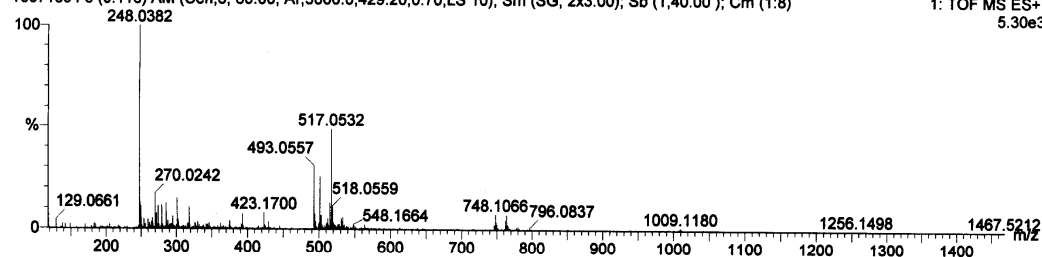

Minimum: -10.0  
Maximum: 50.0

| Mass     | Calc. Mass | mDa | PPM | DBE | i-FIT | Formula        |
|----------|------------|-----|-----|-----|-------|----------------|
| 248.0382 | 248.0381   | 0.1 | 0.4 | 8.5 | 67.9  | C12 H10 N O3 S |

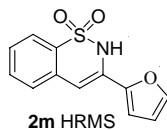

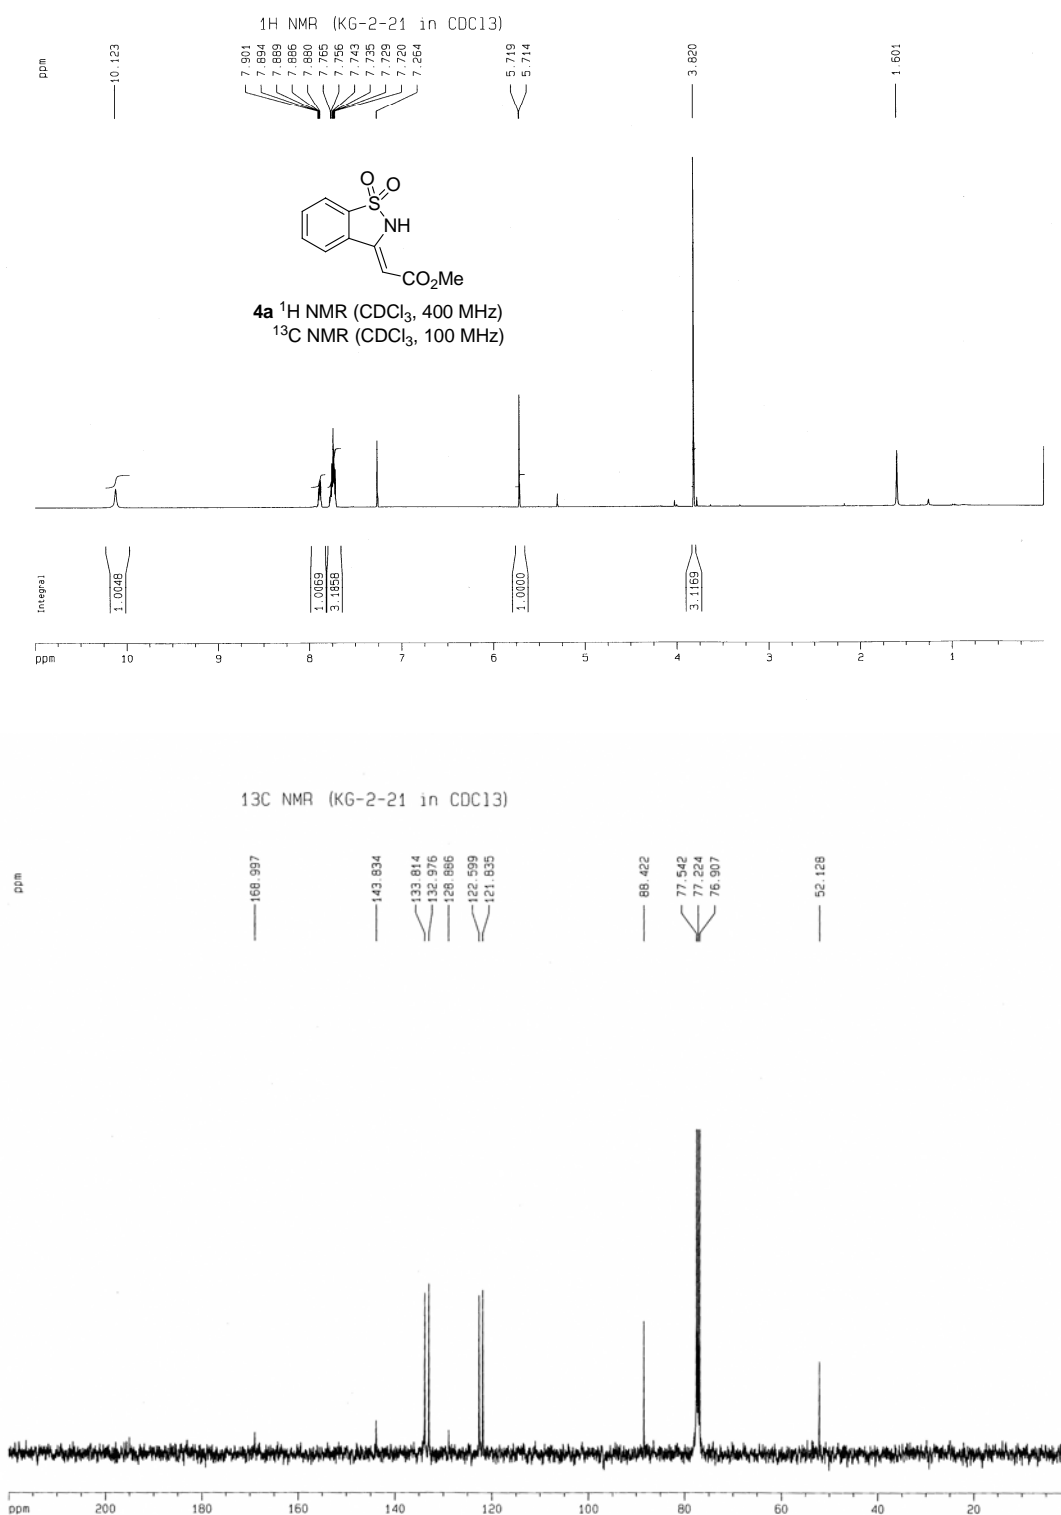

## Elemental Composition Report

Page 1

### Single Mass Analysis

Tolerance = 5.0 PPM / DBE: min = -1.5, max = 100.0

Selected filters: None

Monoisotopic Mass, Odd and Even Electron Ions

6 formula(e) evaluated with 1 results within limits (all results (up to 1000) for each mass)

Elements Used:

C: 10-20 H: 5-20 N: 1-2 O: 2-4 Na: 1-1 S: 1-1

KG-2-21

09091619 4 (0.097) AM (Cen,6, 80.00, Ar,5000.0,475.27,0.70,LS 10); Sm (SG, 2x3.00); Sb (1,40.00); Cm (1:10)

1: TOF MS ES+  
1.65e4

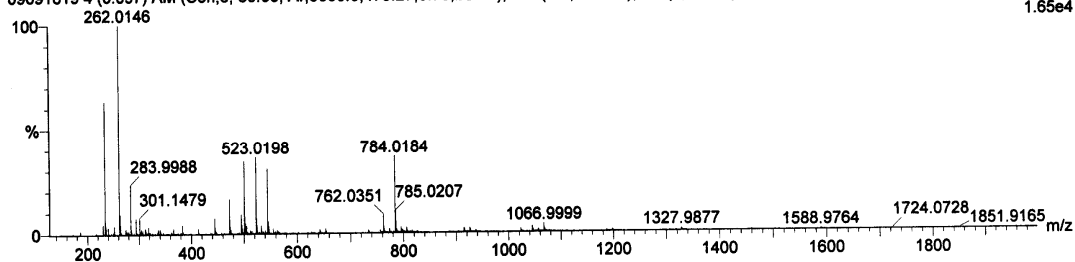

Minimum: -1.5  
Maximum: 5.0 5.0 100.0

| Mass     | Calc. Mass | mDa  | PPM  | DBE | i-FIT | Formula          |
|----------|------------|------|------|-----|-------|------------------|
| 262.0146 | 262.0150   | -0.4 | -1.5 | 6.5 | 118.2 | C10 H9 N O4 Na S |

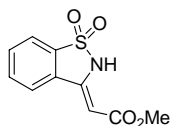

4a HRMS

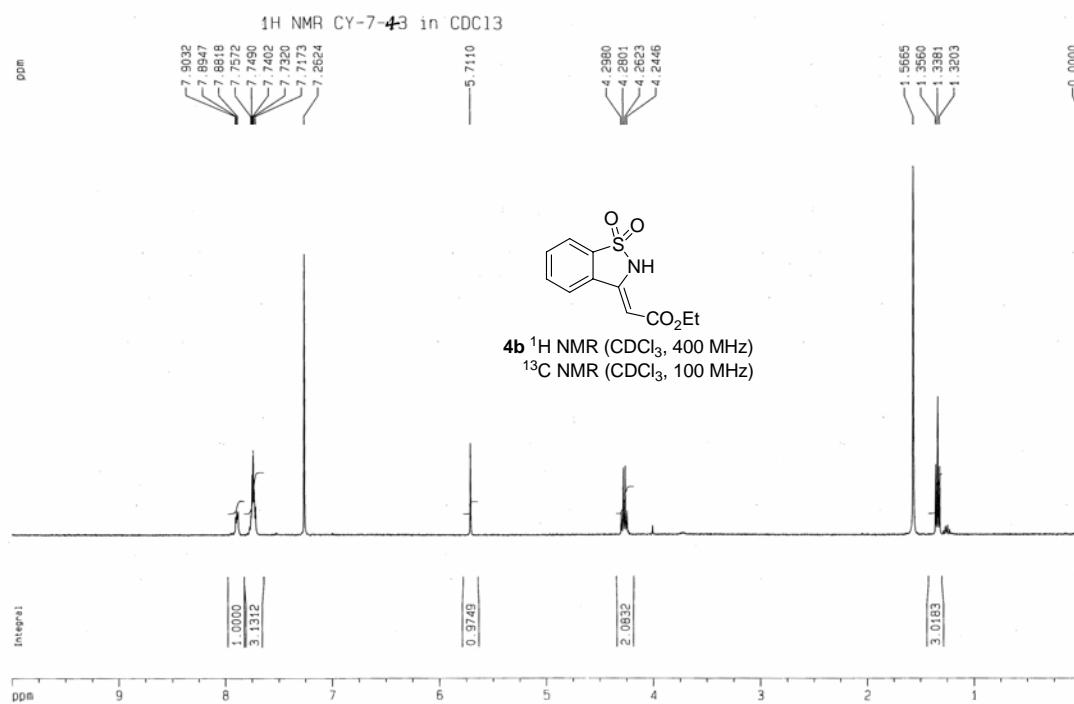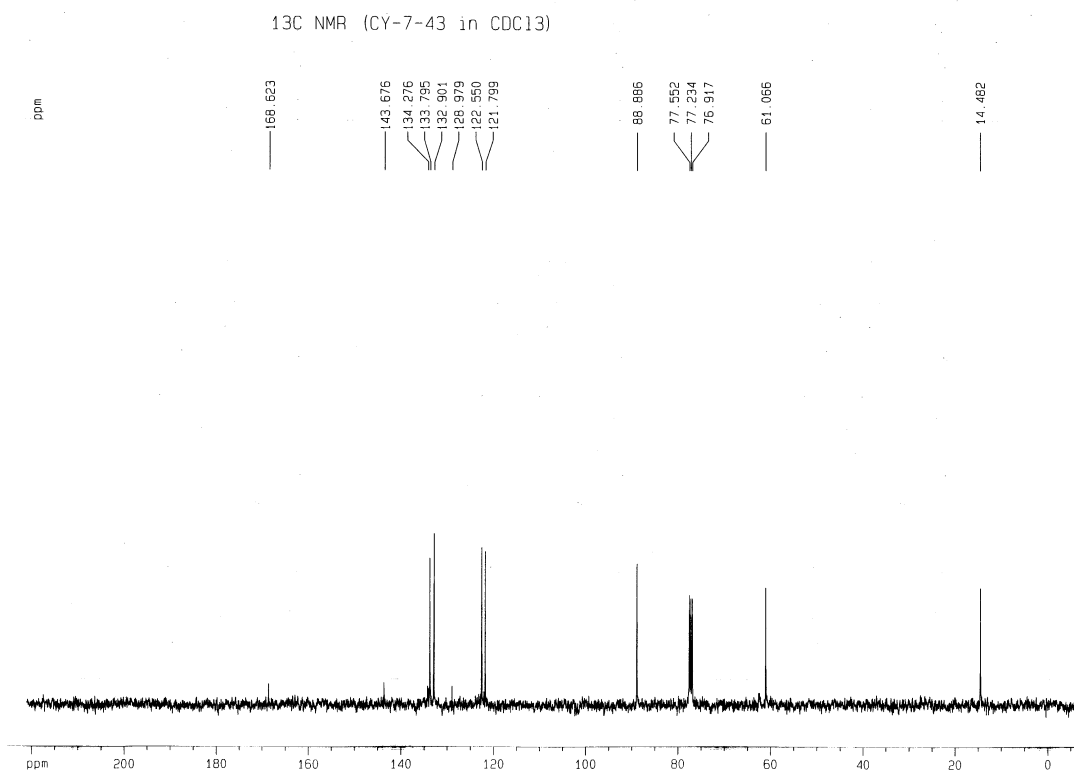

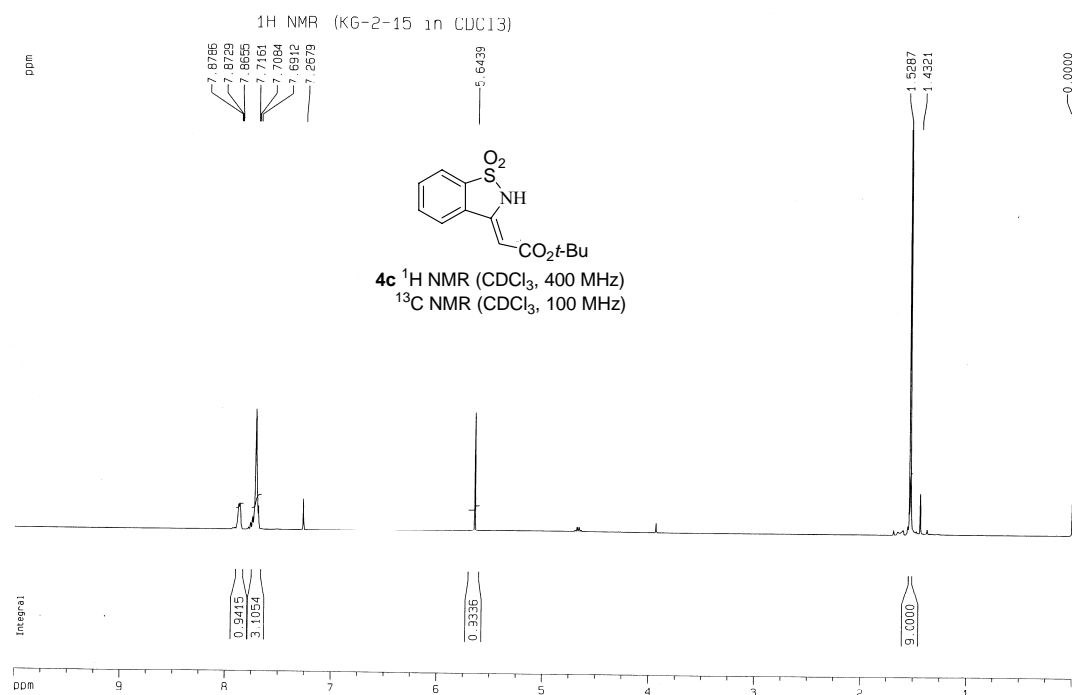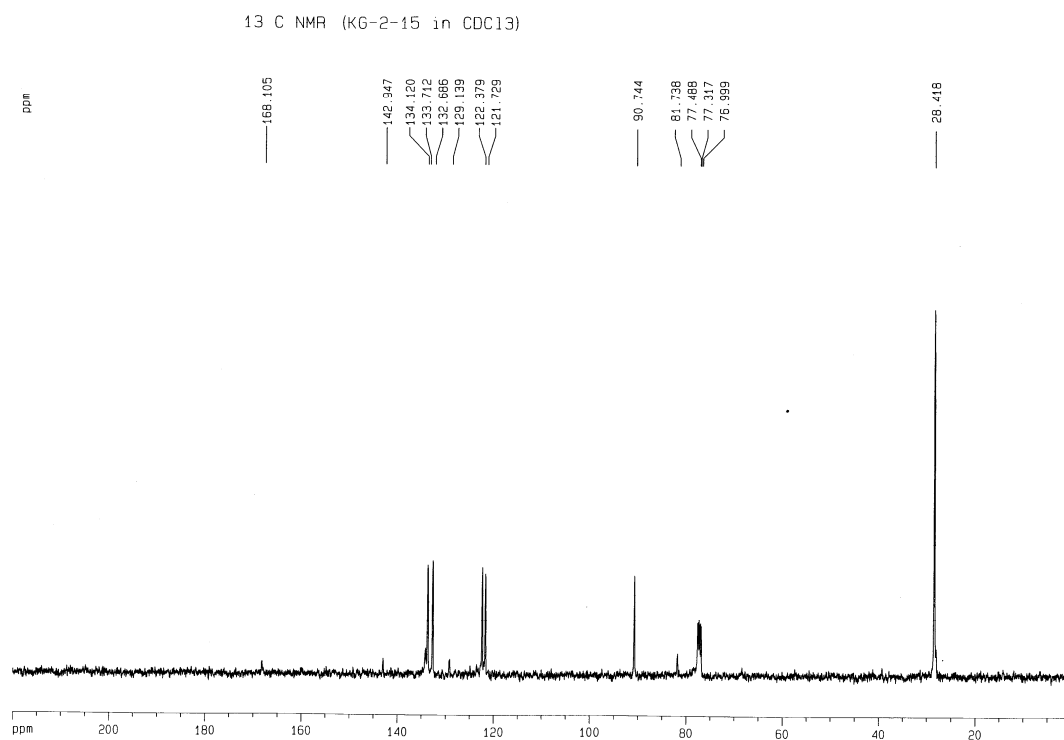



# Elemental Composition Report

Page 1

## Single Mass Analysis

Tolerance = 5.0 PPM / DBE: min = -1.5, max = 100.0

Selected filters: None

Monoisotopic Mass, Odd and Even Electron Ions

5 formula(e) evaluated with 1 results within limits (all results (up to 1000) for each mass)

Elements Used:

C: 10-20 H: 10-20 N: 1-2 O: 2-4 Na: 1-1 S: 1-1

KG-2-15

09091618 48 (1.210) AM (Cen,6, 80.00, Ar,5000.0,475.27,0.70,LS 10); Sm (SG, 2x3.00); Sb (1,40.00 ); Cm (34:48)

1: TOF MS ES+  
3.05e4

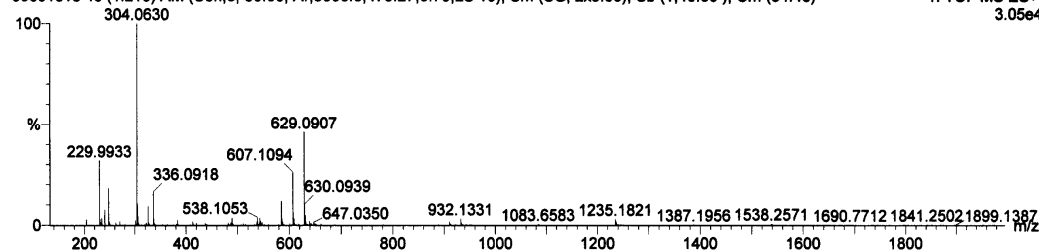

Minimum:

Maximum: 5.0 5.0 -1.5

Mass Calc. Mass mDa PPM DBE i-FIT Formula

304.0630 304.0619 1.1 3.6 6.5 415.9 C13 H15 N O4 Na S

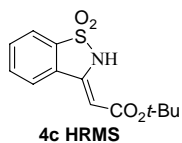

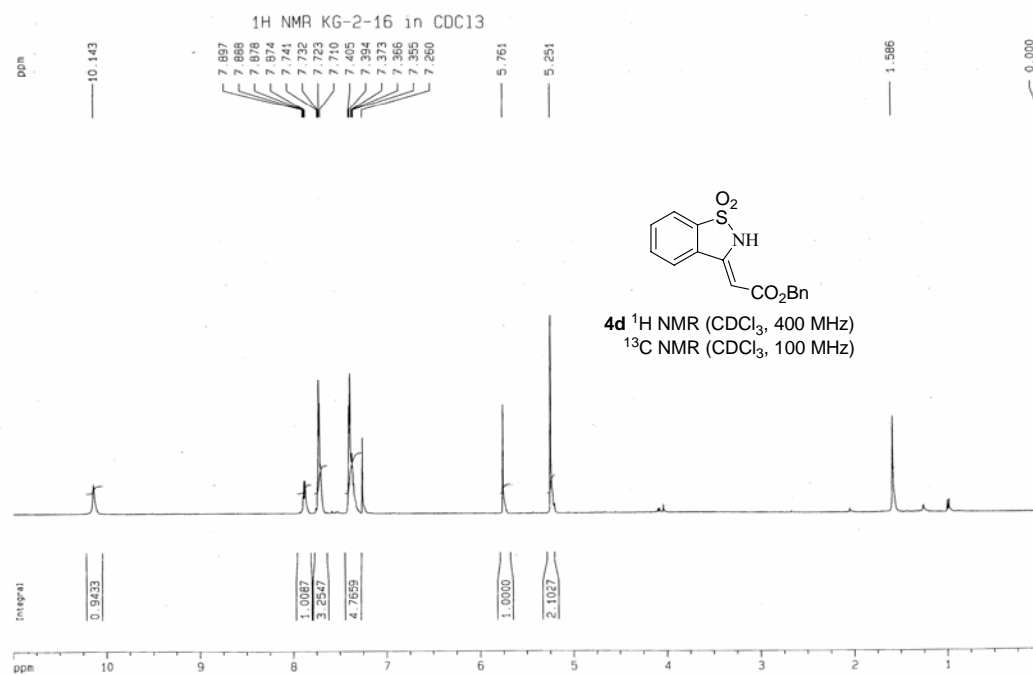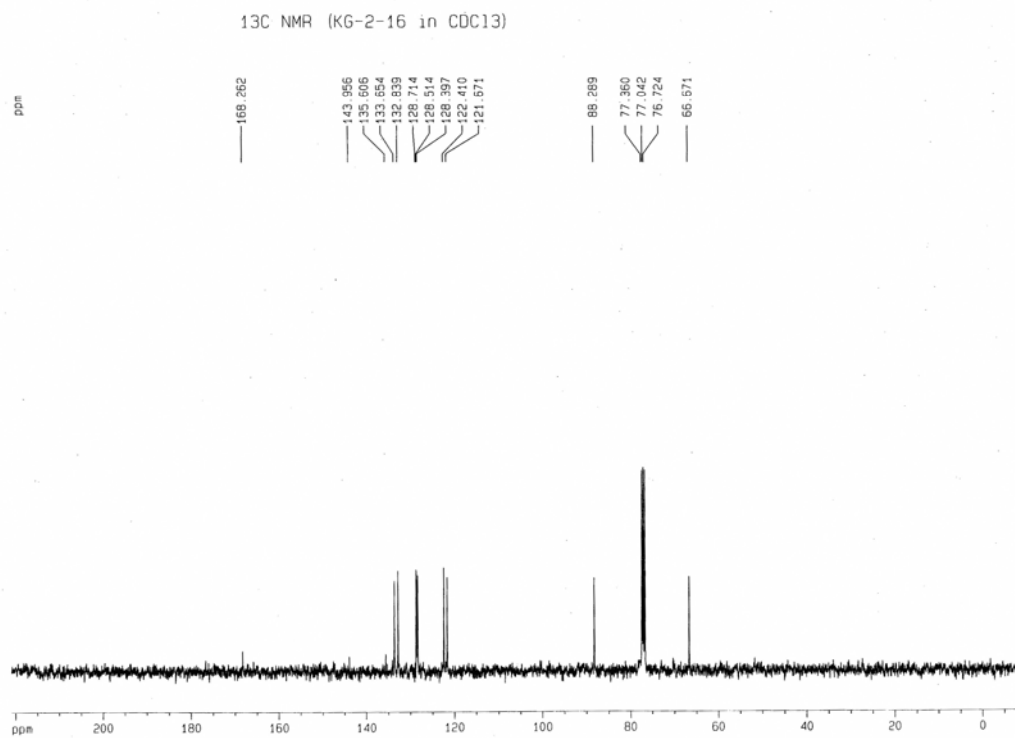

# Elemental Composition Report

Page 1

## Single Mass Analysis

Tolerance = 5.0 PPM / DBE: min = -1.5, max = 100.0

Selected filters: None

Monoisotopic Mass, Odd and Even Electron Ions

2 formula(e) evaluated with 1 results within limits (all results (up to 1000) for each mass)

Elements Used:

C: 10-20 H: 10-20 N: 1-2 O: 4-4 Na: 1-1 S: 1-1

KG-2-16

09091515 8 (0.213) AM (Cen,6, 80.00, Ar,5000.0,475.27,0.70,LS 10); Sm (SG, 2x3.00); Sb (1,40.00); Cm (1:8)

1: TOF MS ES+  
9.36e3

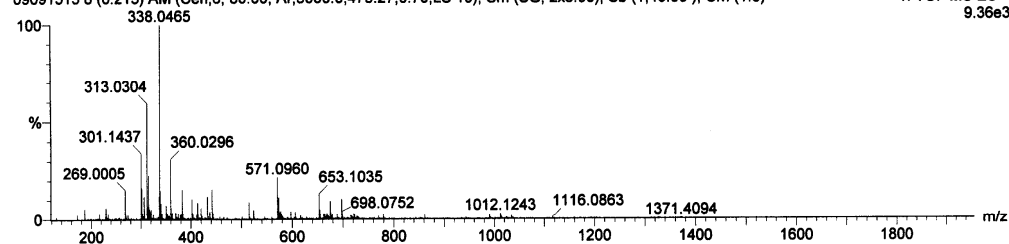

Minimum:

Maximum: 5.0 5.0 -1.5 100.0

| Mass     | Calc. Mass | mDa | PPM | DBE  | i-FIT | Formula           |
|----------|------------|-----|-----|------|-------|-------------------|
| 338.0465 | 338.0463   | 0.2 | 0.6 | 10.5 | 46.2  | C16 H13 N O4 Na S |

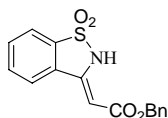

4d HRMS

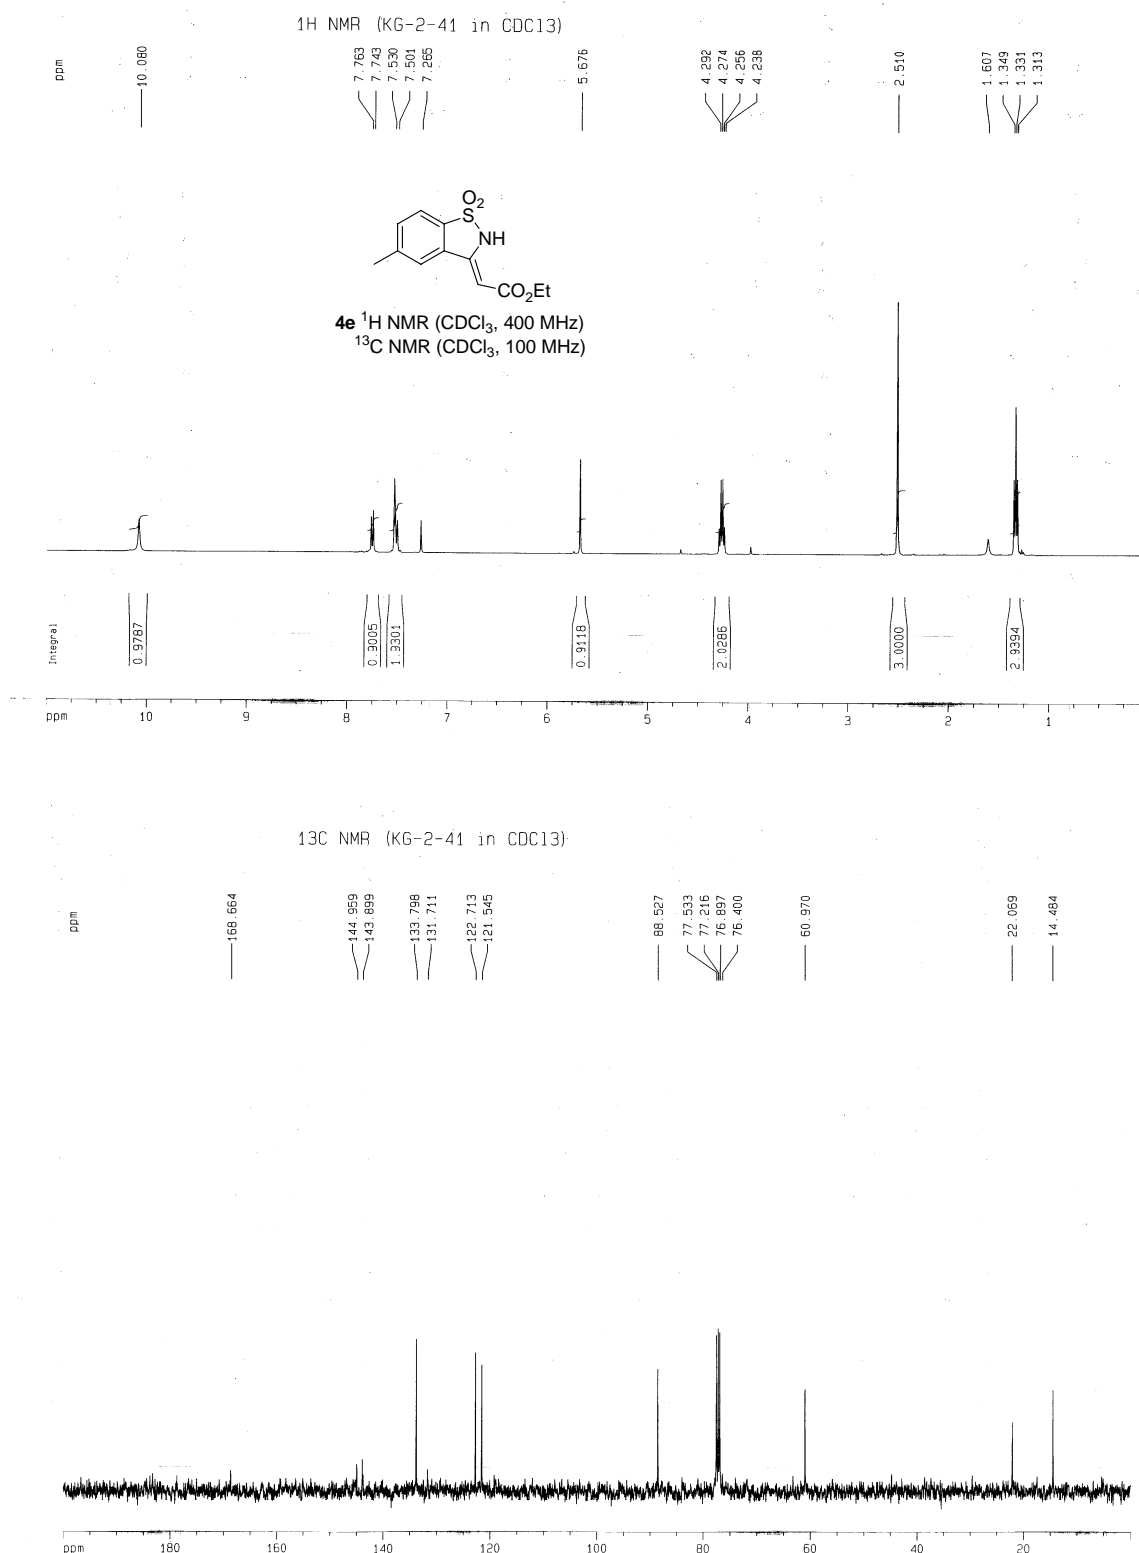

# Elemental Composition Report

Page 1

## Single Mass Analysis

Tolerance = 5.0 PPM / DBE: min = -1.5, max = 100.0

Selected filters: None

Monoisotopic Mass, Odd and Even Electron Ions

2 formula(e) evaluated with 1 results within limits (all results (up to 1000) for each mass)

Elements Used:

C: 10-20 H: 10-20 N: 1-2 O: 4-4 Na: 1-1 S: 1-1

KG-2-42

09091516 16 (0.405) AM (Cen,6, 80.00, Ar,5000.0,475.27,0.70,LS 10); Sm (SG, 2x3.00); Sb (1,40.00); Cm (1:29)

1: TOF MS ES+  
3.58e4

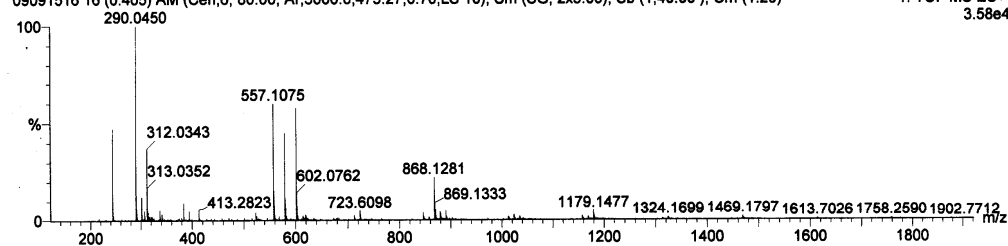

Minimum: -1.5  
Maximum: 100.0

| Mass     | Calc. Mass | mDa  | PPM  | DBE | i-FIT | Formula           |
|----------|------------|------|------|-----|-------|-------------------|
| 290.0450 | 290.0463   | -1.3 | -4.5 | 6.5 | 45.9  | C12 H13 N O4 Na S |

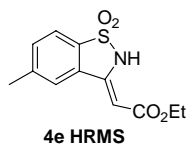

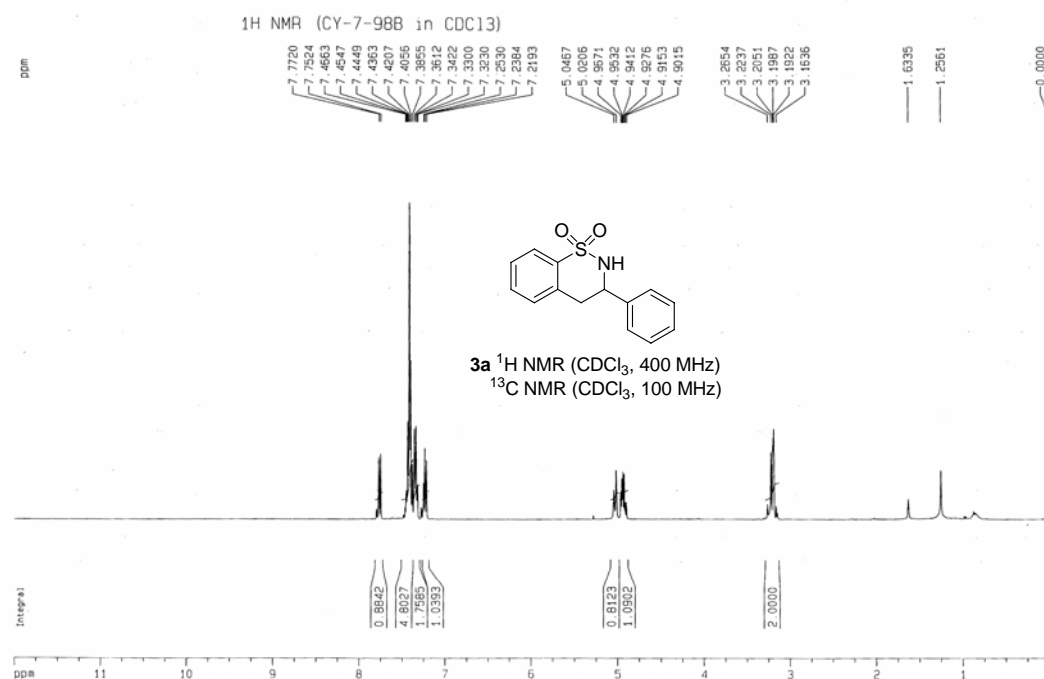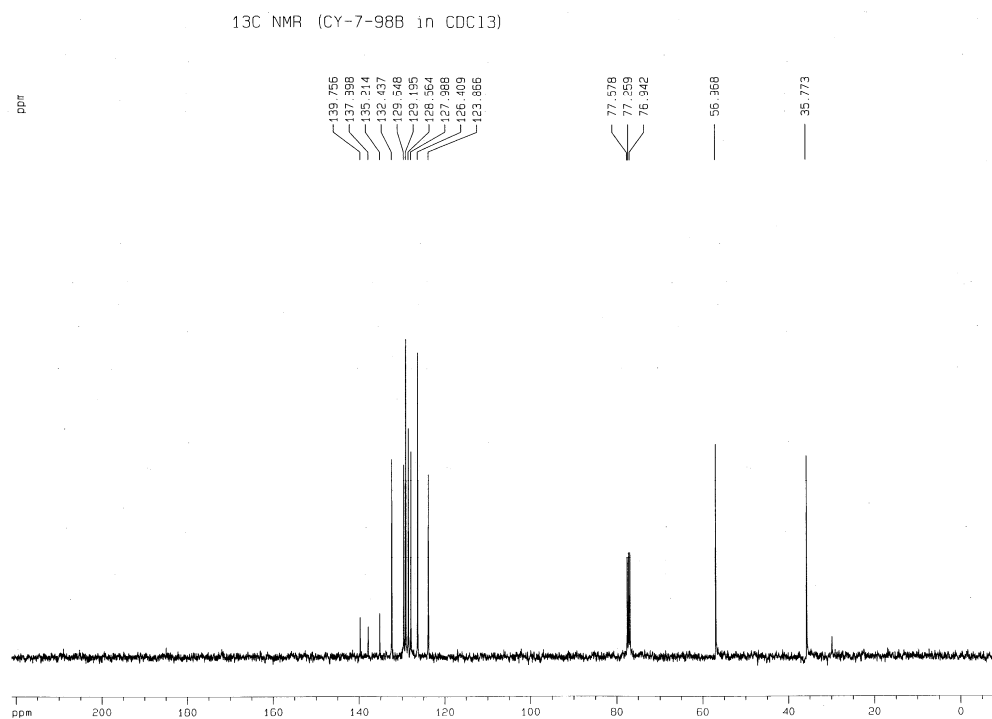

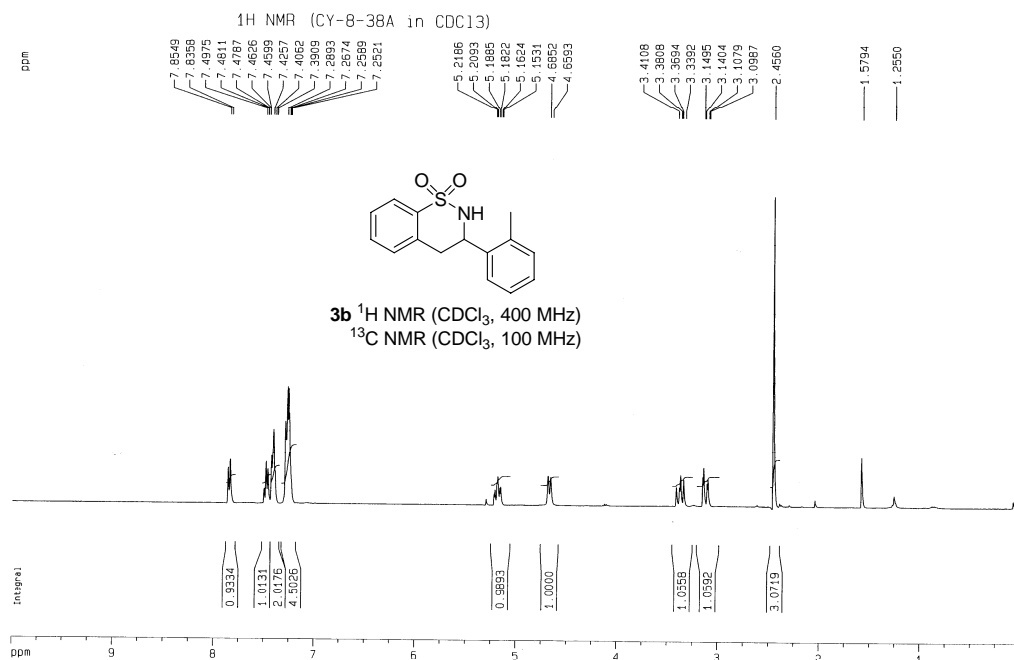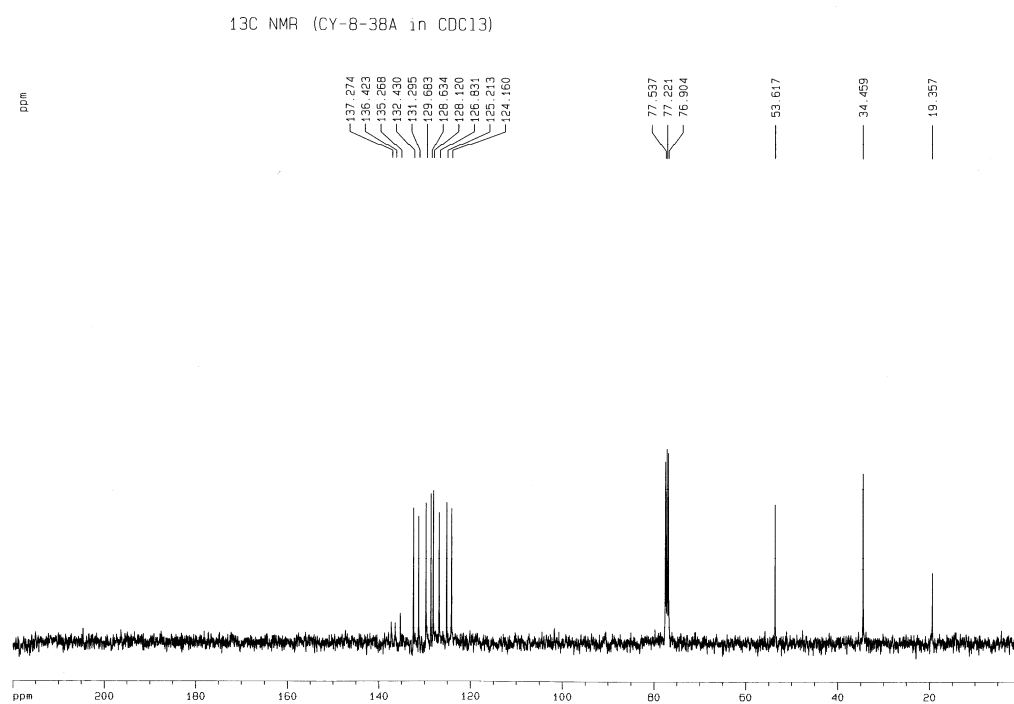

# Elemental Composition Report

Page 1

## Single Mass Analysis

Tolerance = 5.0 PPM / DBE: min = -1.5, max = 100.0

Selected filters: None

Monoisotopic Mass, Even Electron Ions

2 formula(e) evaluated with 1 results within limits (all results (up to 1000) for each mass)

Elements Used:

C: 10-20 H: 10-20 N: 1-2 O: 2-2 Na: 1-1 S: 1-1

CY-8-38A

09091602 3 (0.079) AM (Cen,6, 80.00, Ar,5000.0,475.27,0.70,LS 10); Sm (SG, 2x3.00); Sb (1,40.00); Cm (1:11)

1: TOF MS ES+  
4.45e3

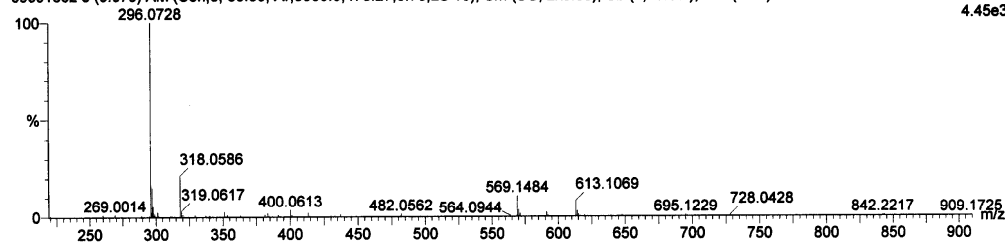

Minimum: -1.5  
Maximum: 5.0 5.0 100.0

| Mass     | Calc. Mass | mDa | PPM | DBE | i-FIT | Formula           |
|----------|------------|-----|-----|-----|-------|-------------------|
| 296.0728 | 296.0721   | 0.7 | 2.4 | 8.5 | 13.3  | C15 H15 N O2 Na S |

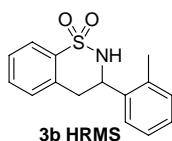



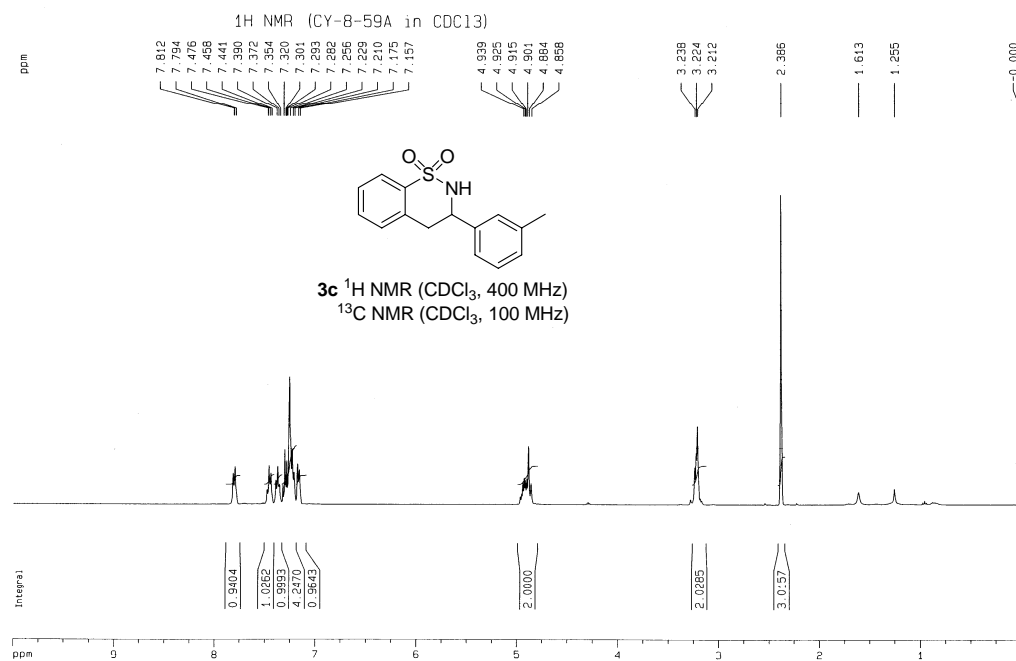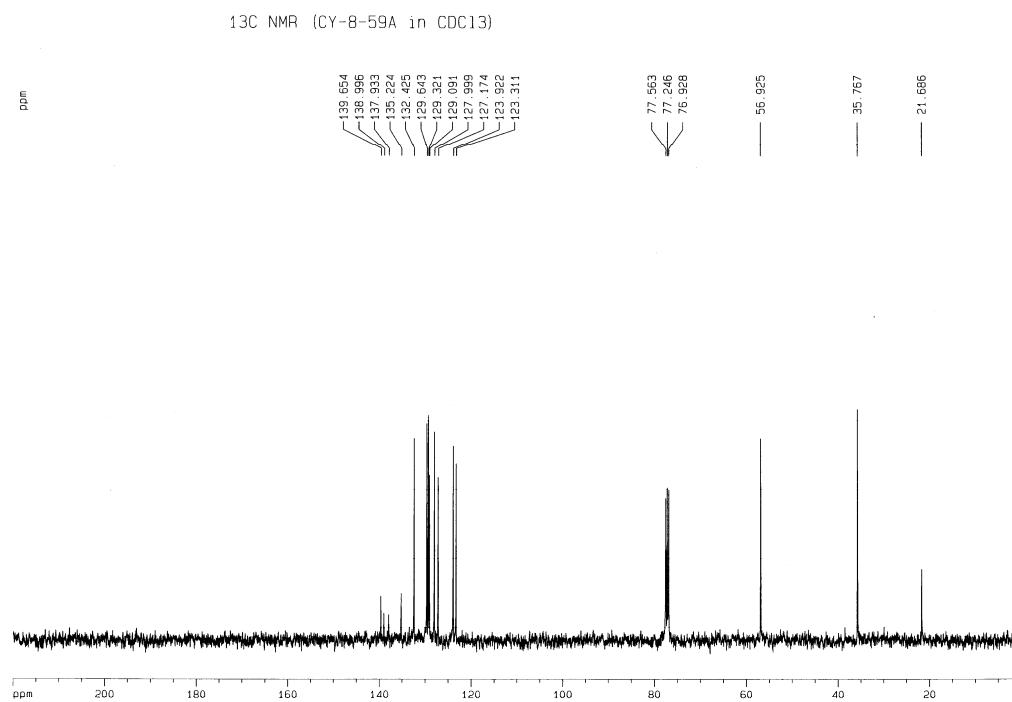

# Elemental Composition Report

Page 1

## Single Mass Analysis

Tolerance = 5.0 PPM / DBE: min = -1.5, max = 100.0

Selected filters: None

Monoisotopic Mass, Even Electron Ions

2 formula(e) evaluated with 1 results within limits (all results (up to 1000) for each mass)

Elements Used:

C: 10-20 H: 10-20 N: 1-2 O: 2-2 Na: 1-1 S: 1-1

CY-8-59A

09091603 20 (0.521) AM (Cen,6, 80.00, Ar,5000.0,475.27,0.70,LS 10); Sm (SG, 2x3.00); Sb (1,40.00); Cm (1:20)

1: TOF MS ES+  
6.73e3

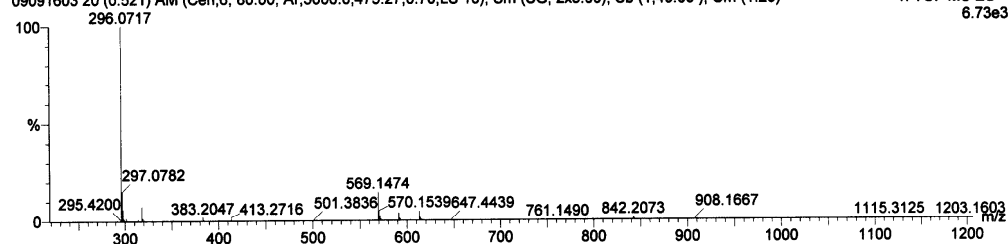

Minimum: -1.5  
Maximum: 100.0

| Mass     | Calc. Mass | mDa  | PPM  | DBE | i-FIT | Formula           |
|----------|------------|------|------|-----|-------|-------------------|
| 296.0717 | 296.0721   | -0.4 | -1.4 | 8.5 | 20.0  | C15 H15 N O2 Na S |

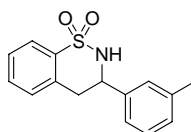

3c HRMS

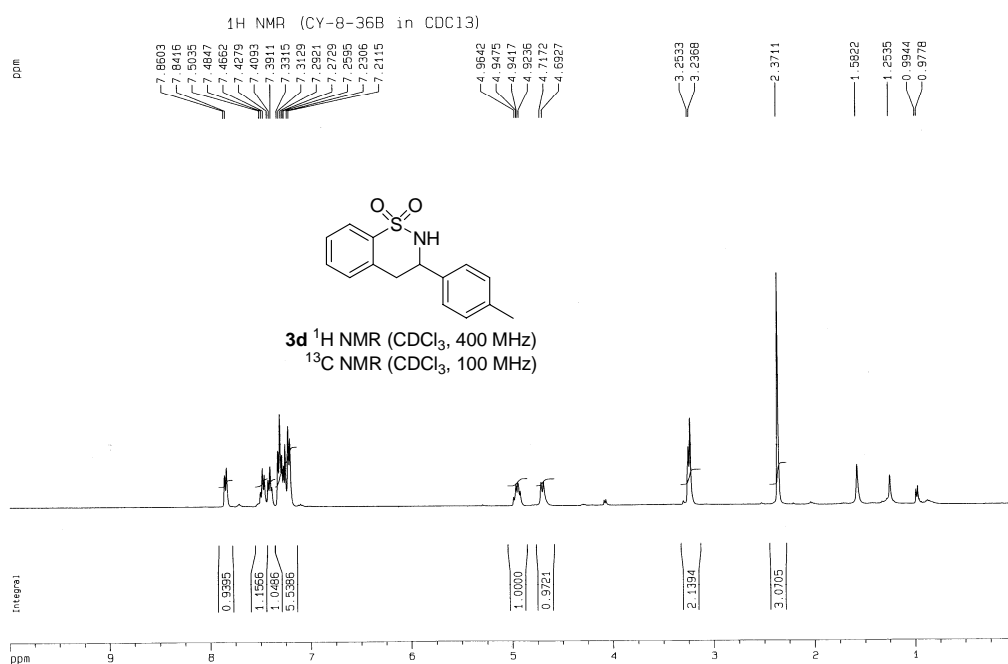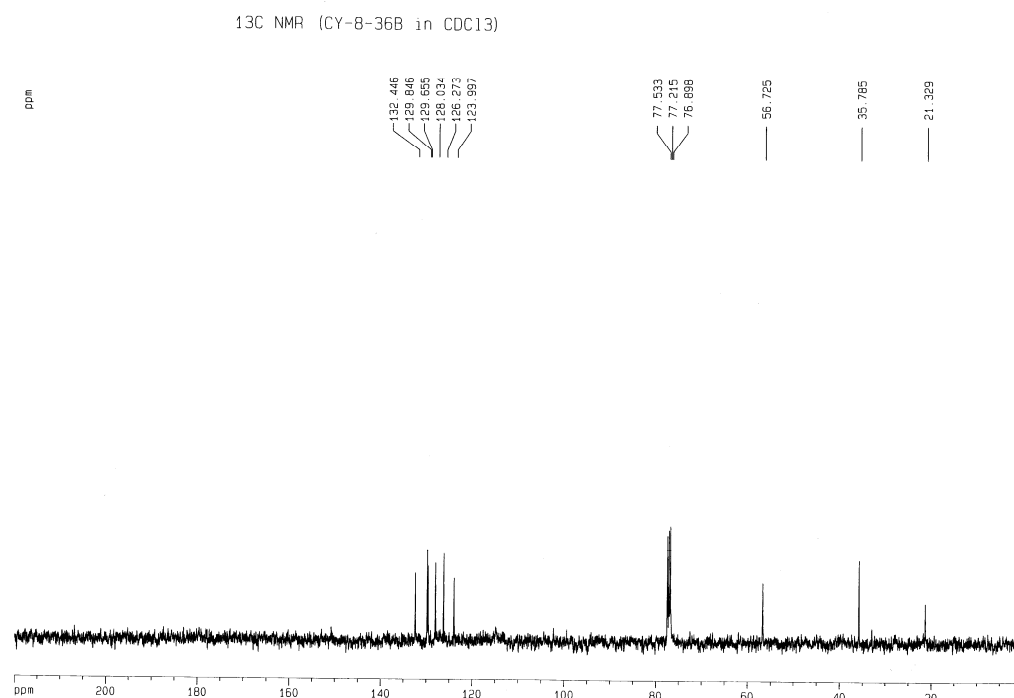

# Elemental Composition Report

Page 1

## Single Mass Analysis

Tolerance = 5.0 PPM / DBE: min = -1.5, max = 100.0

Selected filters: None

Monoisotopic Mass, Even Electron Ions

2 formula(e) evaluated with 1 results within limits (all results (up to 1000) for each mass)

Elements Used:

C: 10-20 H: 10-20 N: 1-2 O: 2-2 Na: 1-1 S: 1-1

CY-8-37A

09091604 4 (0.097) AM (Cen,6, 80.00, Ar,5000.0,475.27,0.70,LS 10); Sm (SG, 2x3.00); Sb (1,40.00); Cm (1:12)

1: TOF MS ES+  
9.32e3

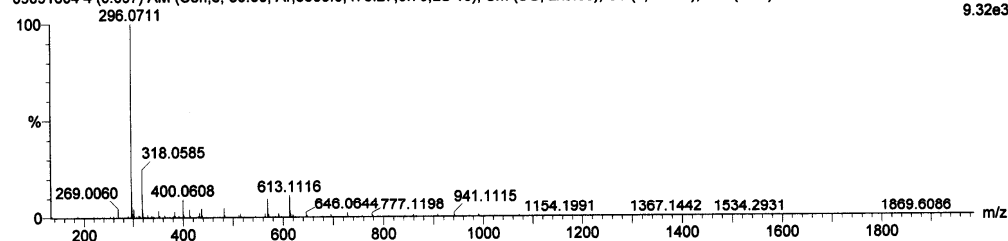

Minimum: -1.5  
Maximum: 5.0 5.0 100.0

| Mass     | Calc. Mass | mDa  | PPM  | DBE | i-FIT | Formula           |
|----------|------------|------|------|-----|-------|-------------------|
| 296.0711 | 296.0721   | -1.0 | -3.4 | 8.5 | 63.6  | C15 H15 N O2 Na S |

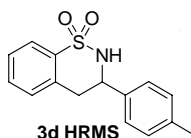

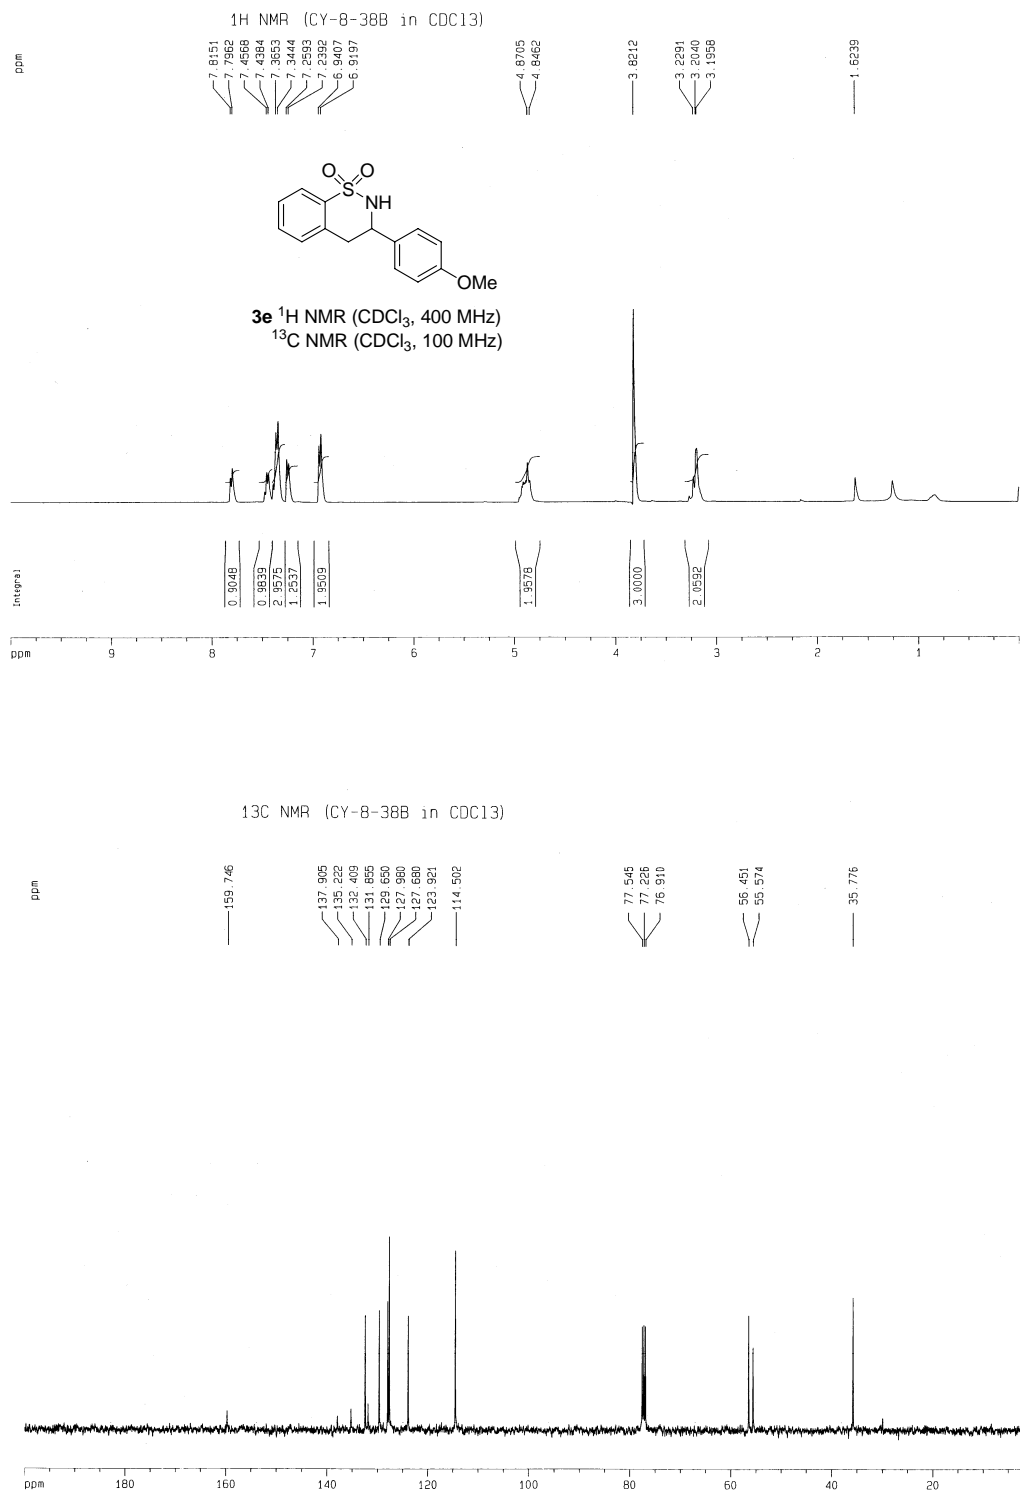

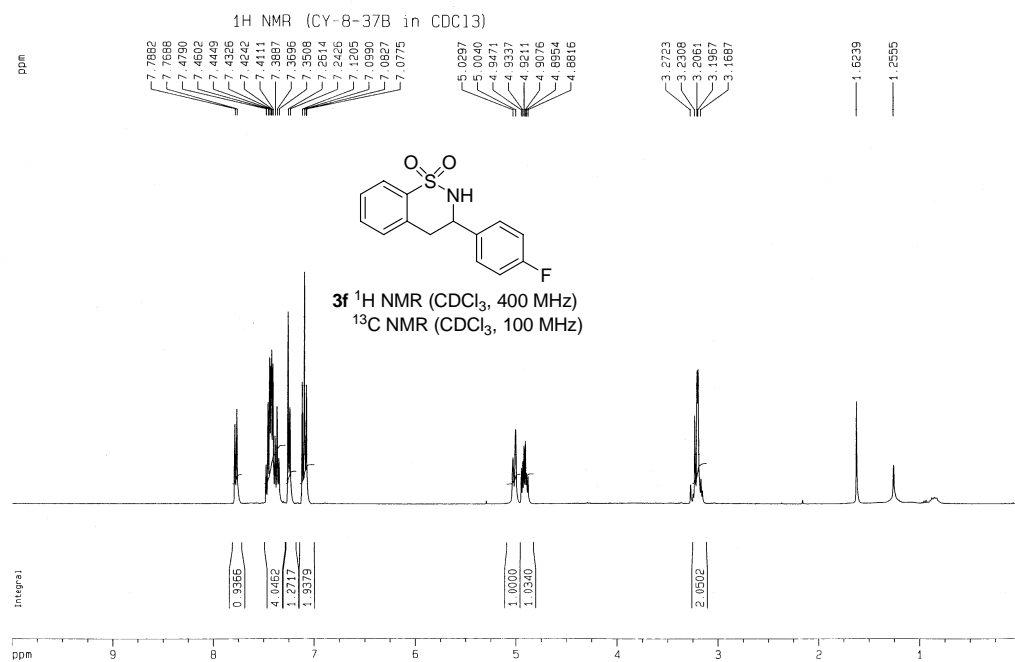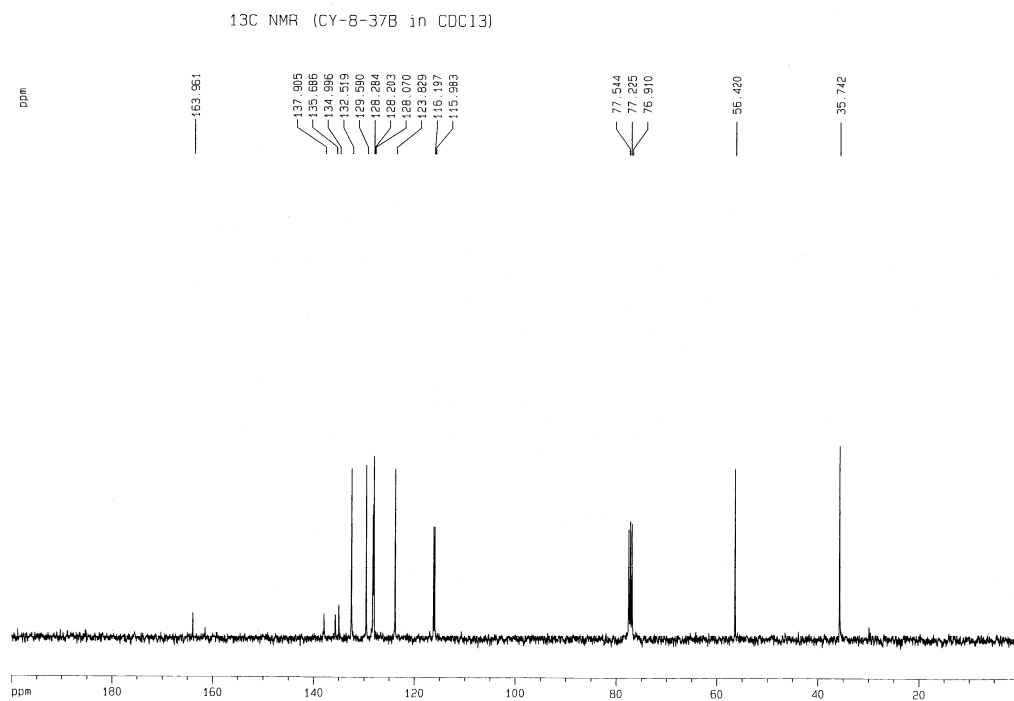

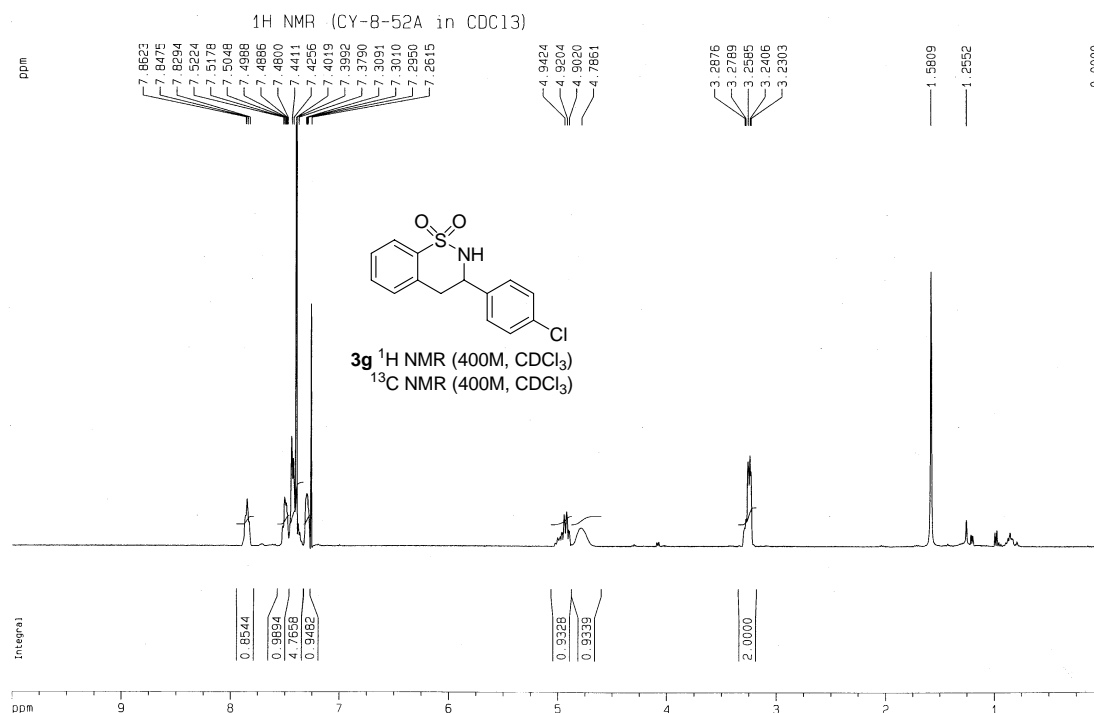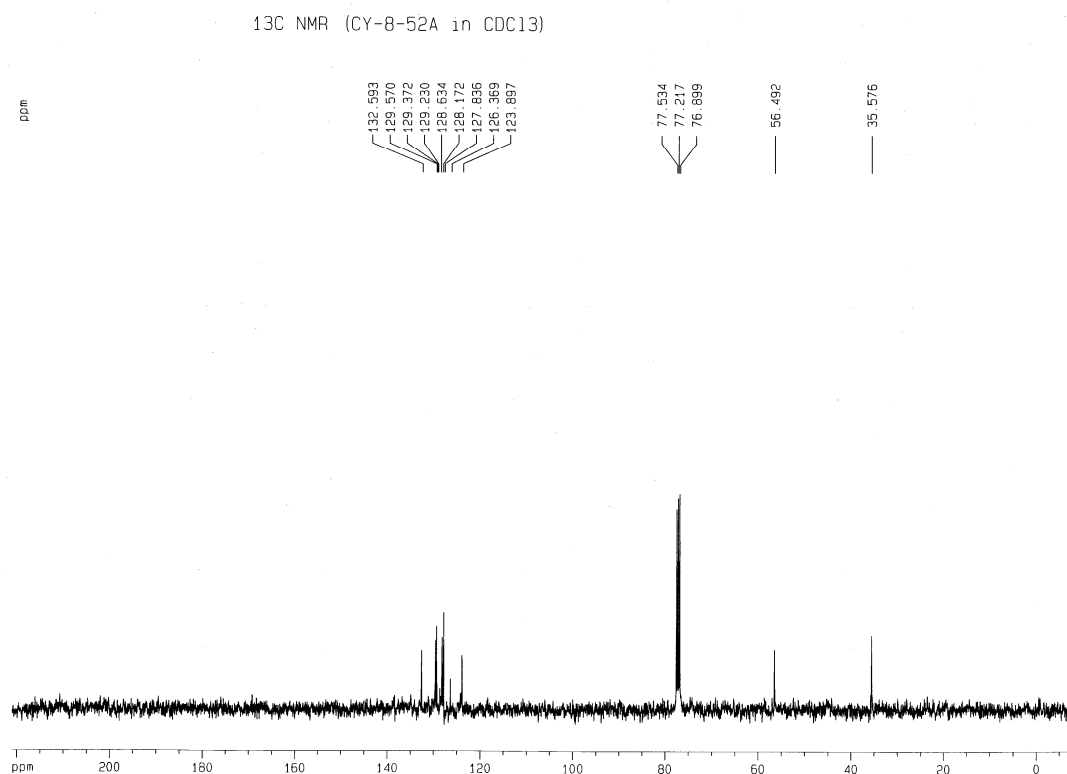

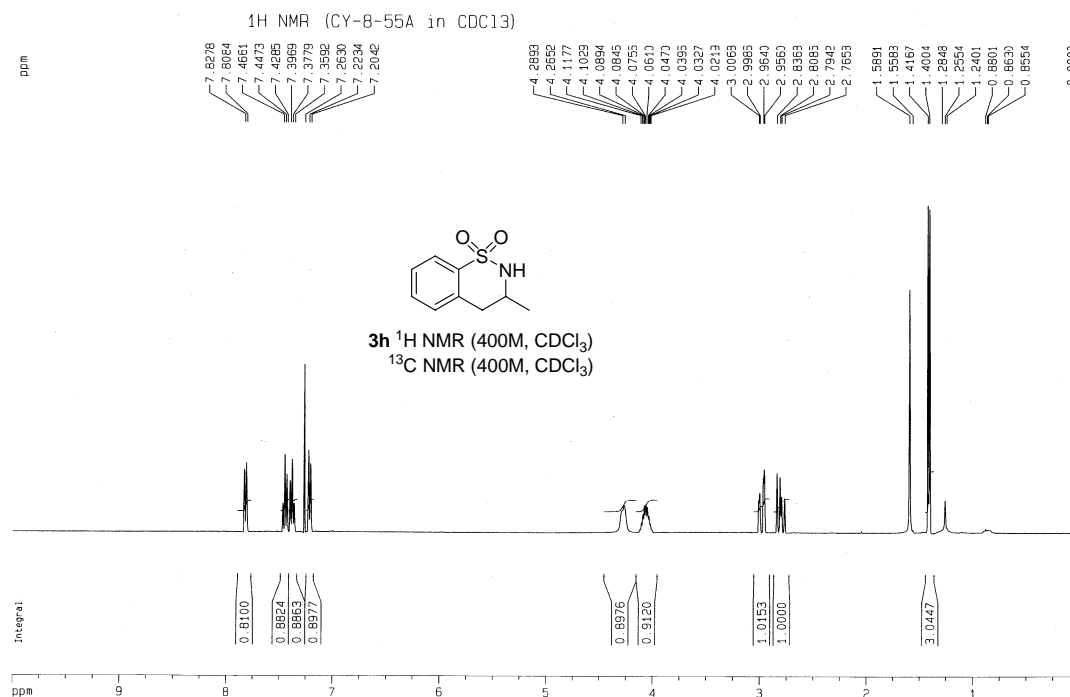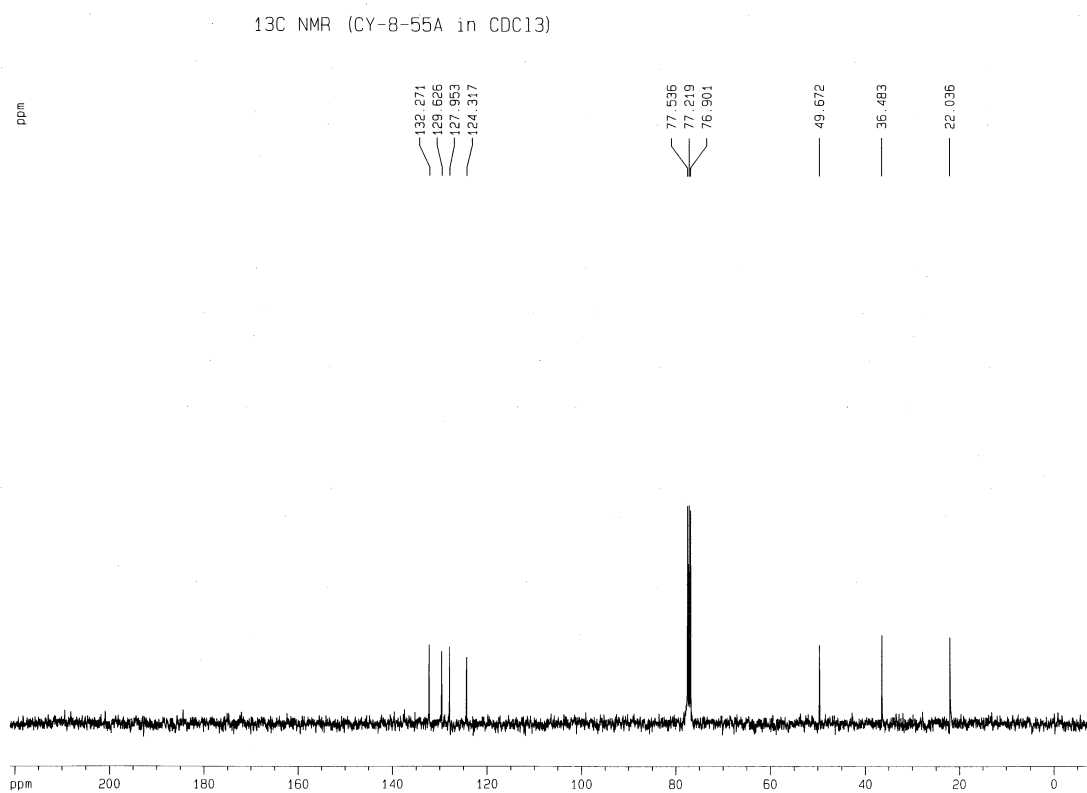



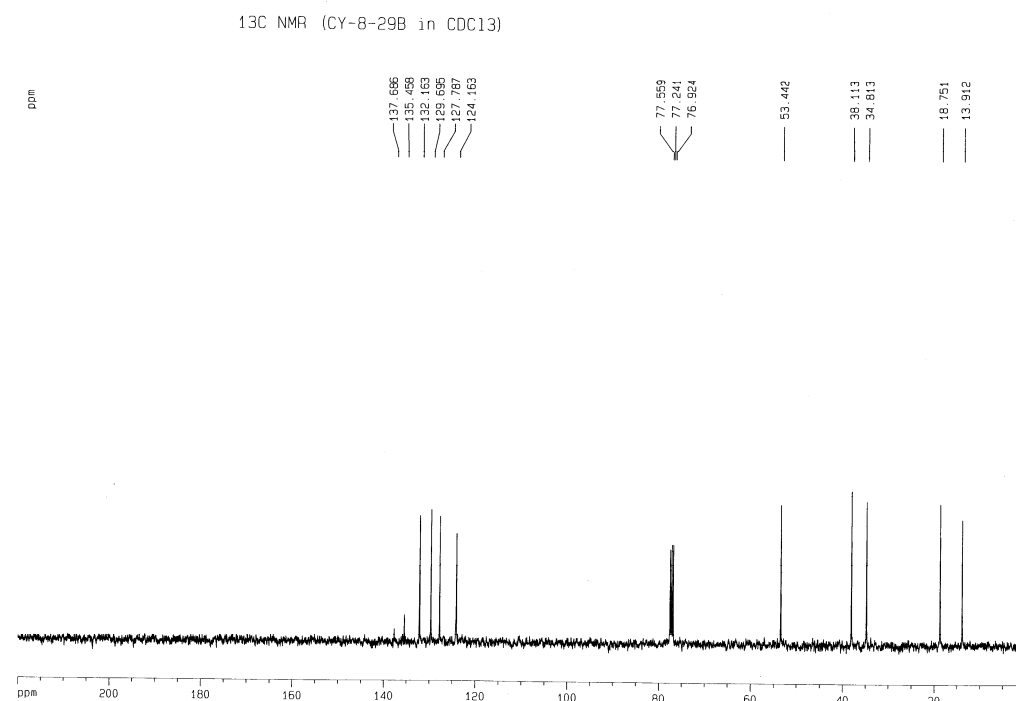

# Elemental Composition Report

Page 1

## Single Mass Analysis

Tolerance = 5.0 PPM / DBE: min = -1.5, max = 100.0

Selected filters: None

Monoisotopic Mass, Odd and Even Electron Ions

4 formula(e) evaluated with 1 results within limits (all results (up to 1000) for each mass)

Elements Used:

C: 10-20 H: 5-20 N: 1-2 O: 2-4 Na: 1-1 S: 1-1

CY-7-88

09091620 28 (0.715) AM (Cen,6, 80.00, Ar,5000.0,475.27,0.70,LS 10); Sm (SG, 2x3.00); Sb (1,40.00); Cm (25:39)

1: TOF MS ES+  
1.77e4

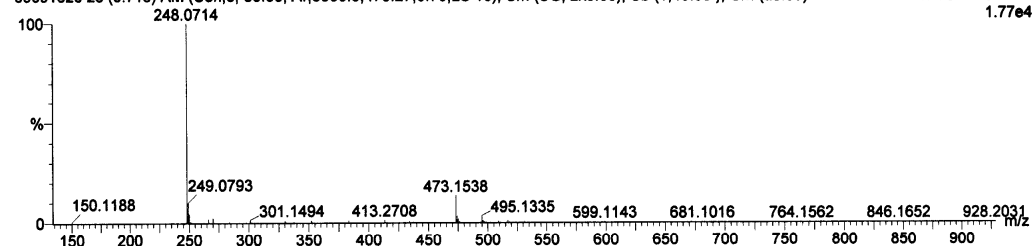

Minimum: -1.5  
Maximum: 5.0 5.0 100.0

| Mass     | Calc. Mass | mDa  | PPM  | DBE | i-FIT | Formula           |
|----------|------------|------|------|-----|-------|-------------------|
| 248.0714 | 248.0721   | -0.7 | -2.8 | 4.5 | 141.8 | C11 H15 N O2 Na S |

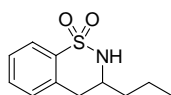

3i HRMS

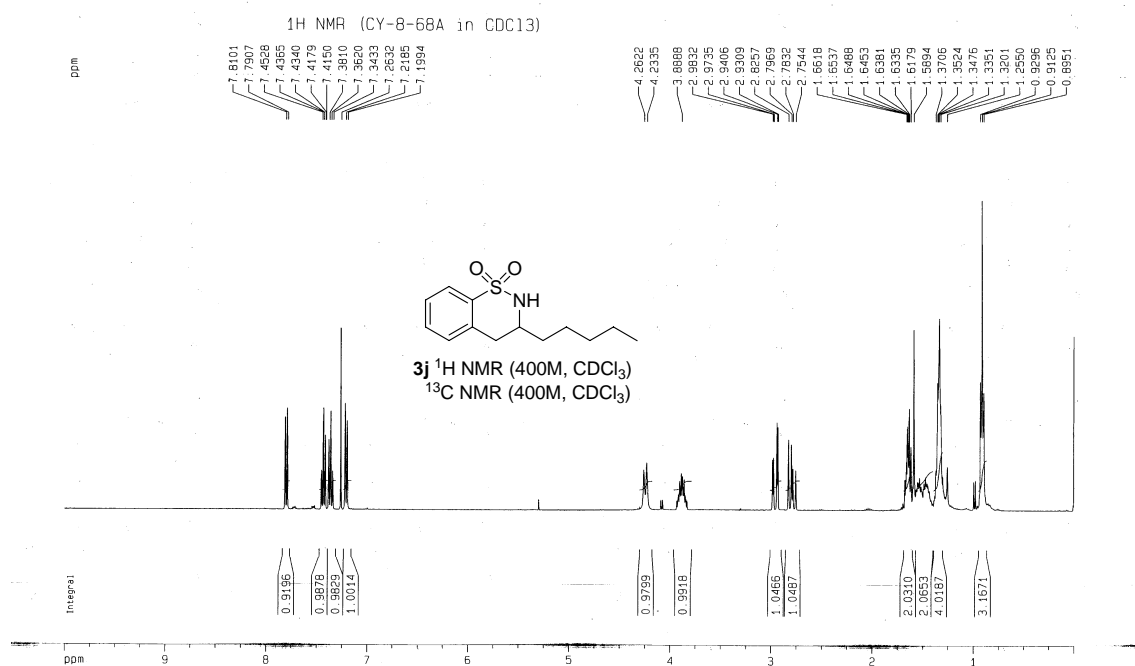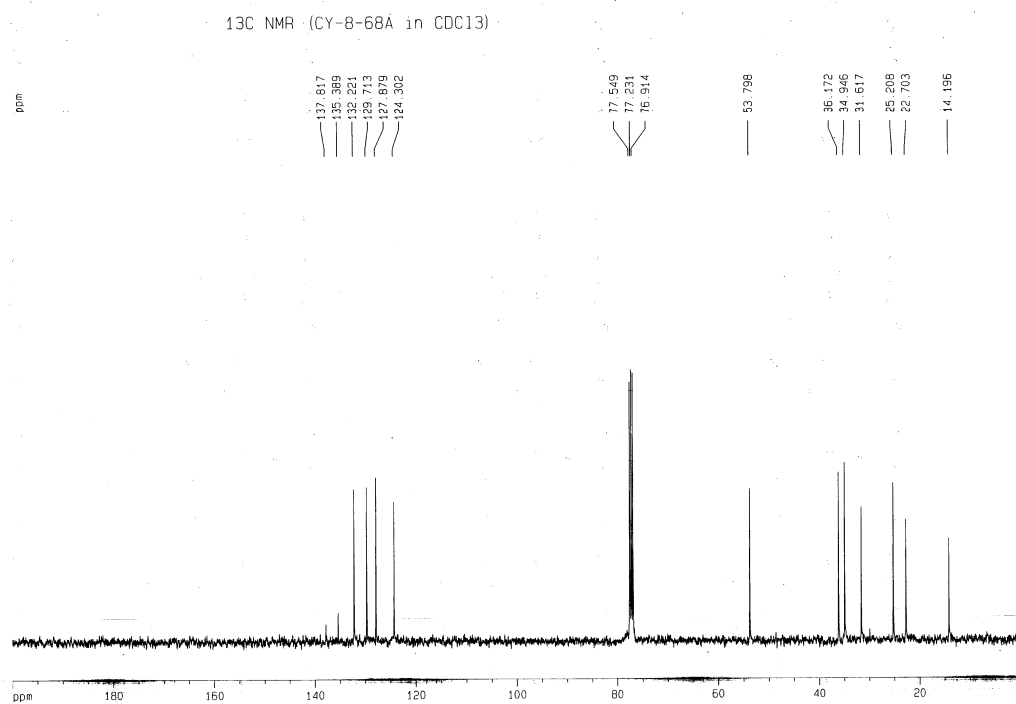

# Elemental Composition Report

Page 1

## Single Mass Analysis

Tolerance = 5.0 PPM / DBE: min = -1.5, max = 100.0

Selected filters: None

Monoisotopic Mass, Odd and Even Electron Ions

19 formula(e) evaluated with 1 results within limits (all results (up to 1000) for each mass)

Elements Used:

C: 10-76 H: 8-80 N: 1-3 O: 2-6 Na: 1-1 S: 1-1

CY-8-68A

09112010 18 (0.440) AM (Cen,6, 80.00, Ar,5000.0,475.27,0.70,LS 10); Sm (SG, 2x3.00); Sb (1,40.00); Cm (17:28)

1: TOF MS ES+  
1.96e4

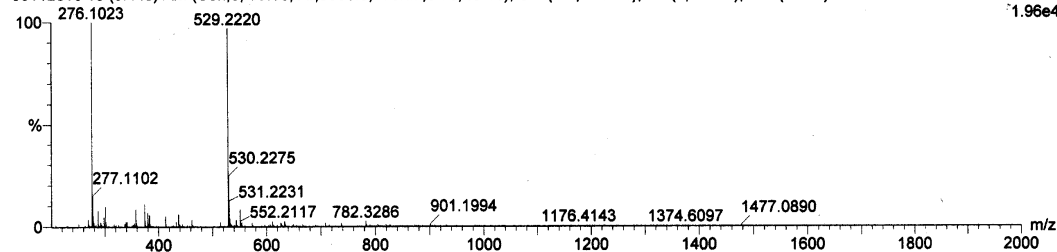

Minimum: -1.5  
Maximum: 100.0

| Mass     | Calc. Mass | mDa  | PPM  | DBE | i-FIT | Formula           |
|----------|------------|------|------|-----|-------|-------------------|
| 276.1023 | 276.1034   | -1.1 | -4.0 | 4.5 | 21.8  | C13 H19 N O2 Na S |

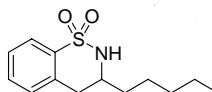

3J HRMS

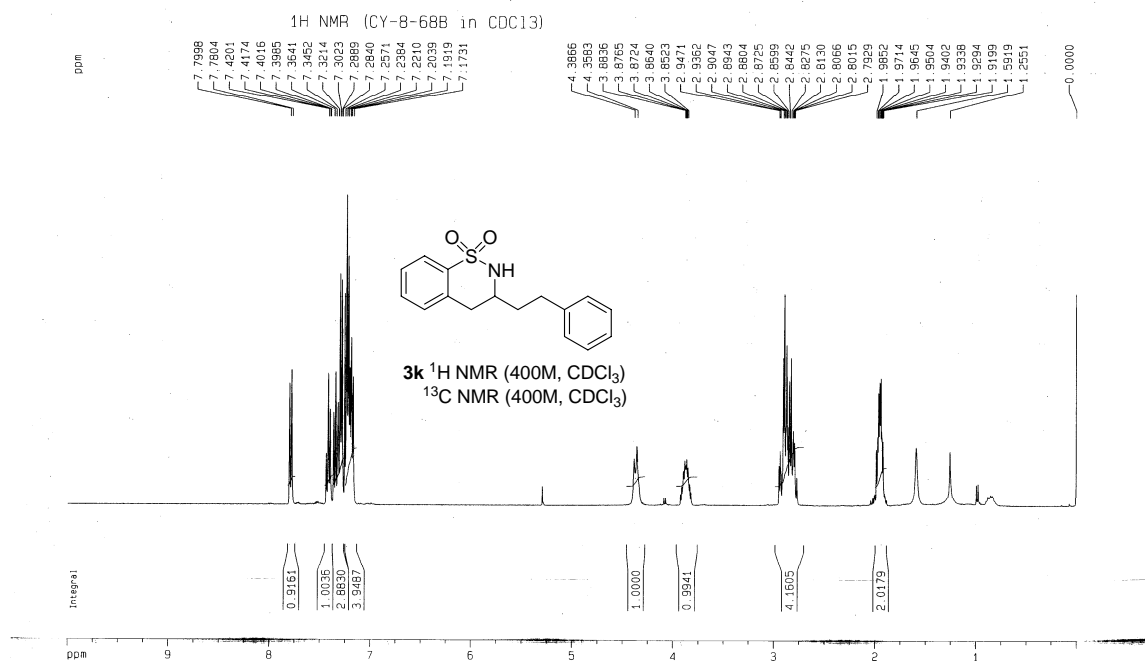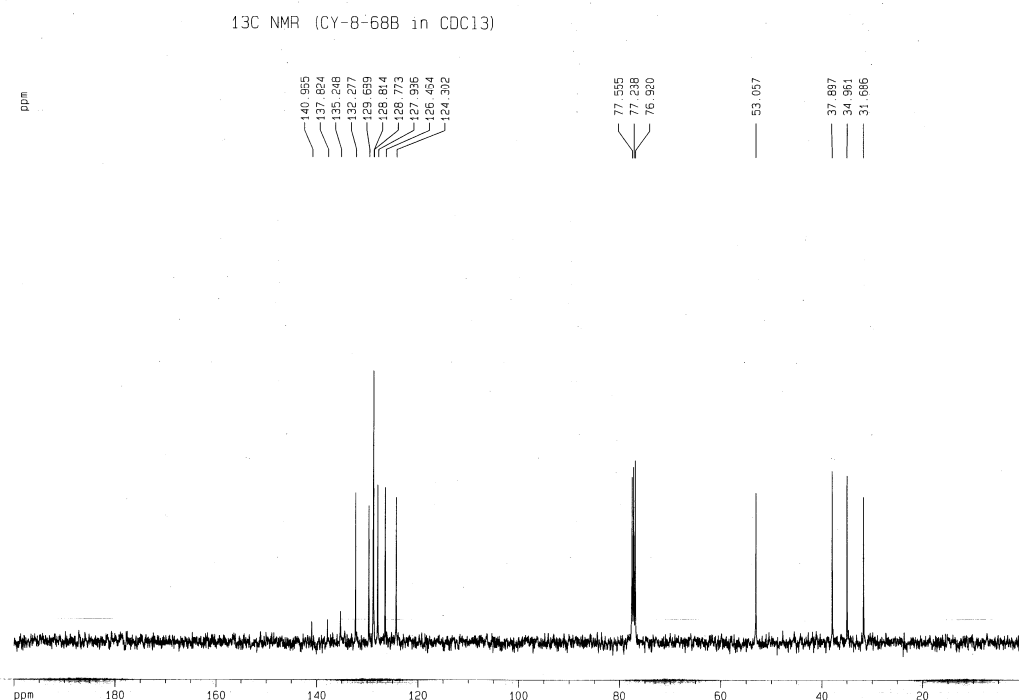

# Elemental Composition Report

Page 1

## Single Mass Analysis

Tolerance = 50.0 PPM / DBE: min = -1.5, max = 100.0

Selected filters: None

Monoisotopic Mass, Even Electron Ions

3 formula(e) evaluated with 1 results within limits (all results (up to 1000) for each mass)

Elements Used:

C: 10-76 H: 8-80 N: 1-1 O: 2-2 Na: 1-1 S: 1-1

QC-8-688

09112023 28 (0.714) AM (Cen,6, 80.00, Ar,5000.0,475.27,0.70,LS 10); Sm (SG, 2x3.00); Sb (1,40.00); Cm (4:37)

1: TOF MS ES+  
1.75e4

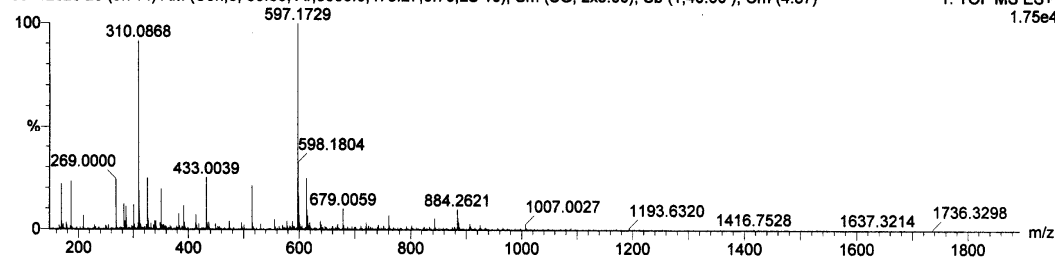

Minimum: -1.5  
Maximum: 5.0 50.0 100.0

| Mass     | Calc. Mass | mDa  | PPM  | DBE | i-FIT | Formula           |
|----------|------------|------|------|-----|-------|-------------------|
| 310.0868 | 310.0878   | -1.0 | -3.2 | 8.5 | 16.9  | C16 H17 N O2 Na S |

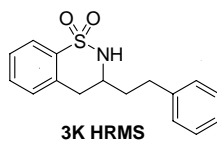

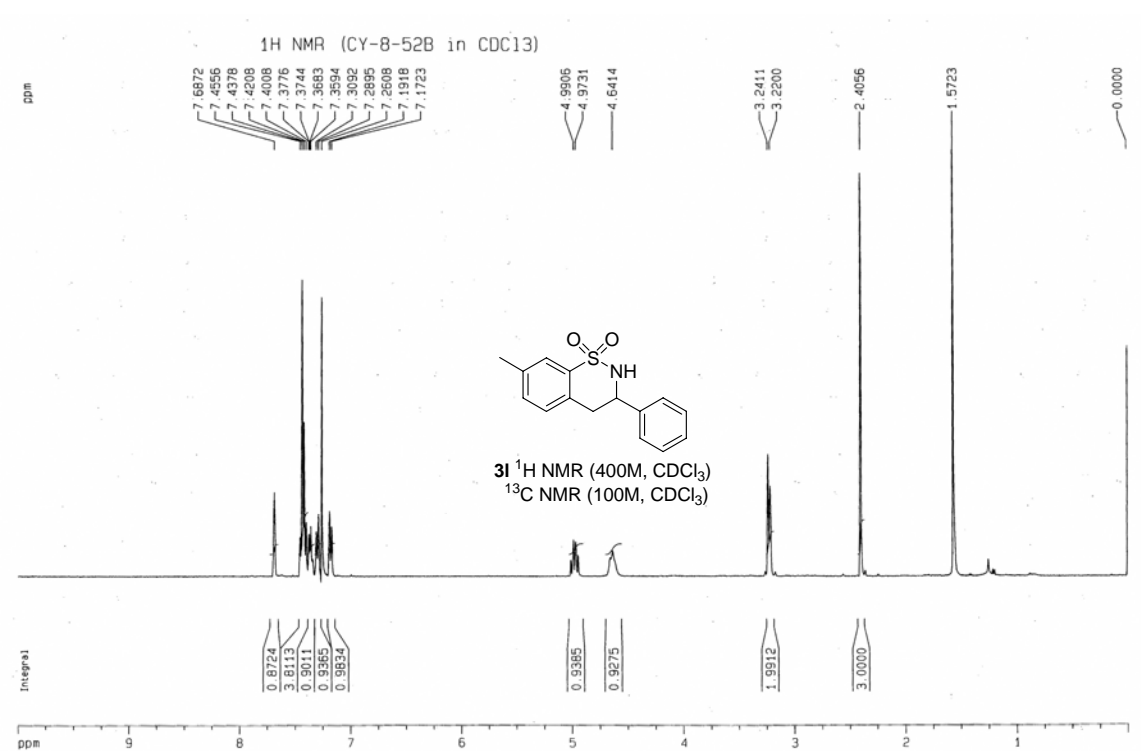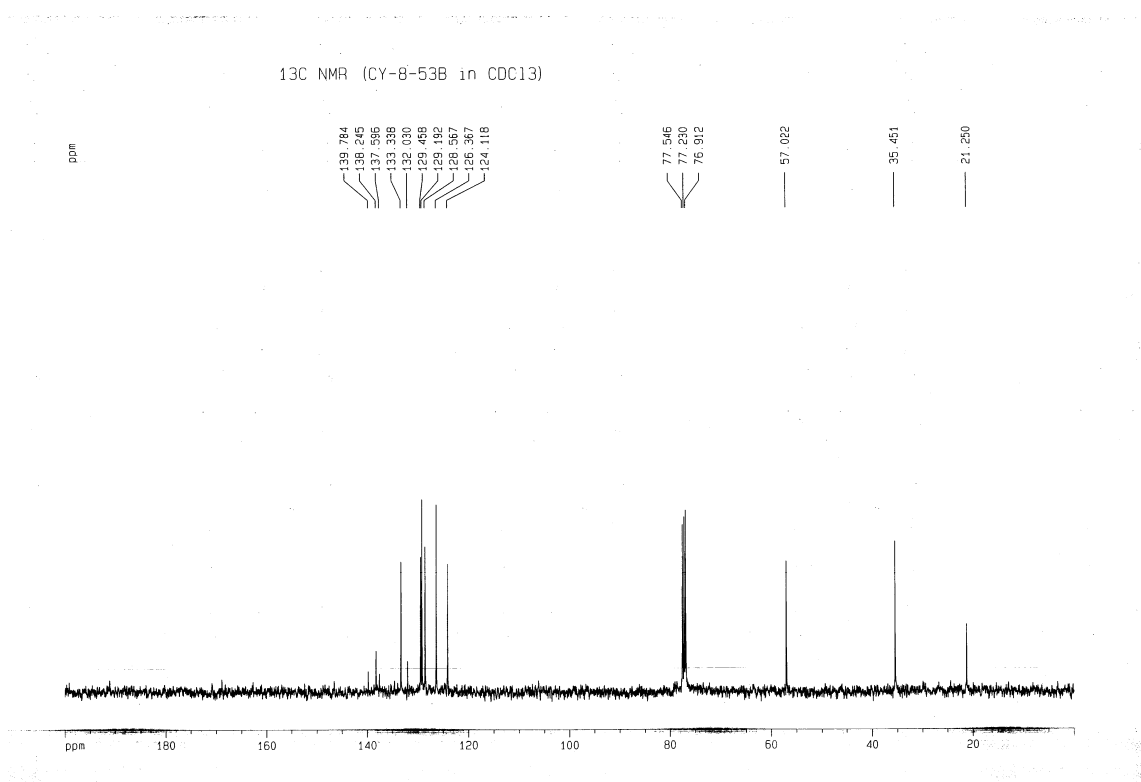

# Elemental Composition Report

Page 1

## Single Mass Analysis

Tolerance = 5.0 PPM / DBE: min = -1.5, max = 100.0

Selected filters: None

Monoisotopic Mass, Odd and Even Electron Ions

2 formula(e) evaluated with 1 results within limits (all results (up to 1000) for each mass)

Elements Used:

C: 10-20 H: 10-20 N: 1-2 O: 2-2 Na: 1-1 S: 1-1

CY-538

09091601 29 (0.728) AM (Cen,6, 80.00, Ar,5000.0,475.27,0.70,LS 10); Sm (SG, 2x3.00); Sb (1,40.00 ); Cm (28:35)

1: TOF MS ES+  
5.94e3

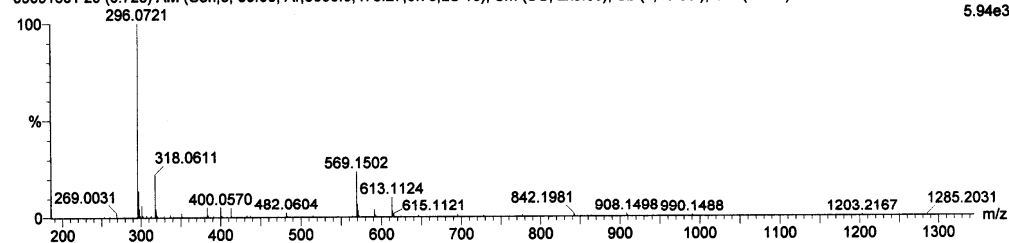

Minimum: -1.5  
Maximum: 5.0 5.0 100.0

| Mass     | Calc. Mass | mDa | PPM | DBE | i-FIT | Formula           |
|----------|------------|-----|-----|-----|-------|-------------------|
| 296.0721 | 296.0721   | 0.0 | 0.0 | 8.5 | 42.9  | C15 H15 N O2 Na S |

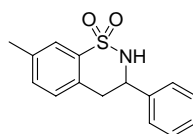

3I HRMS



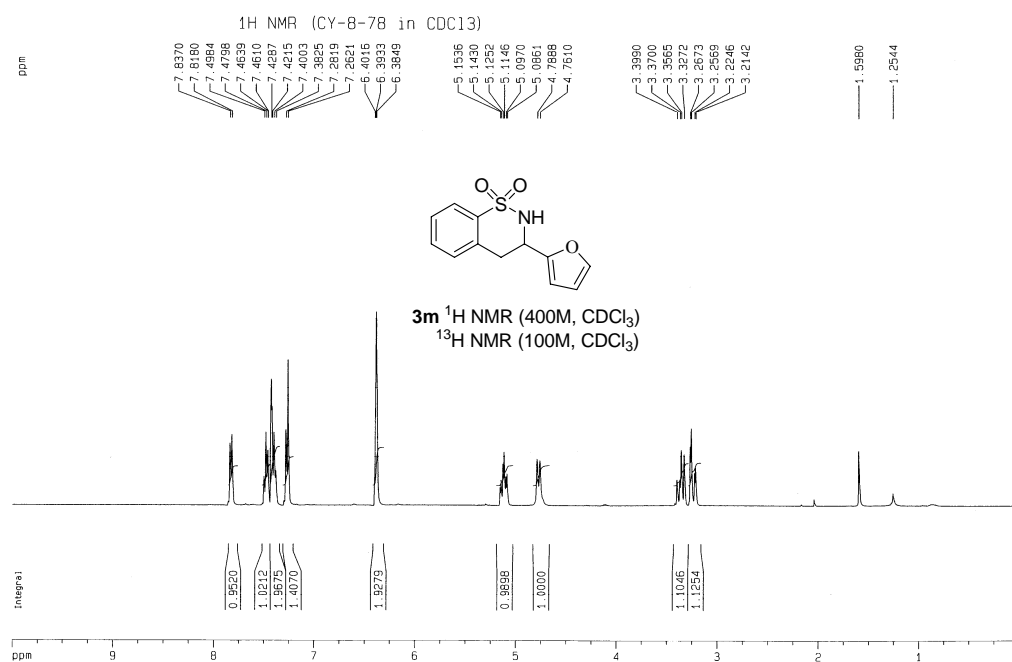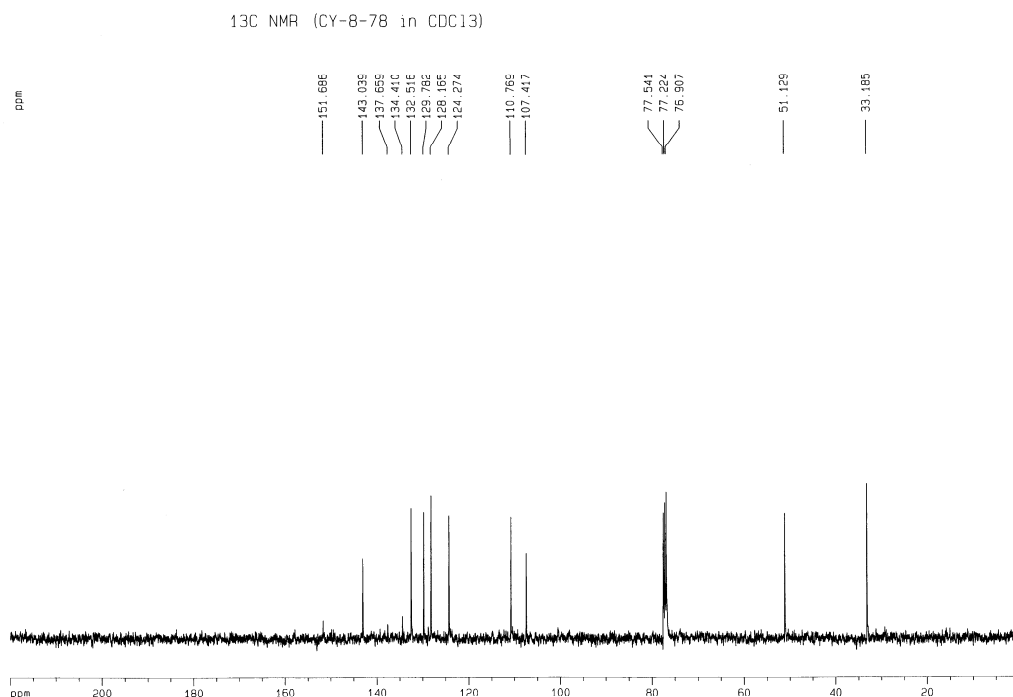

## Elemental Composition Report

Page 1

### Single Mass Analysis

Tolerance = 5.0 PPM / DBE: min = -1.5, max = 100.0

Selected filters: None

Monoisotopic Mass, Odd and Even Electron Ions

12 formula(e) evaluated with 1 results within limits (all results (up to 1000) for each mass)

Elements Used:

C: 10-76 H: 8-80 N: 1-3 O: 3-6 Na: 1-1 S: 1-1

CY-8-78

09112009 4 (0.097) AM (Cen,6, 80.00, Ar,5000.0,475.27,0.70,LS 10); Sm (SG, 2x3.00); Sb (1,40.00); Cm (1:12)

1: TOF MS ES+  
1.12e4

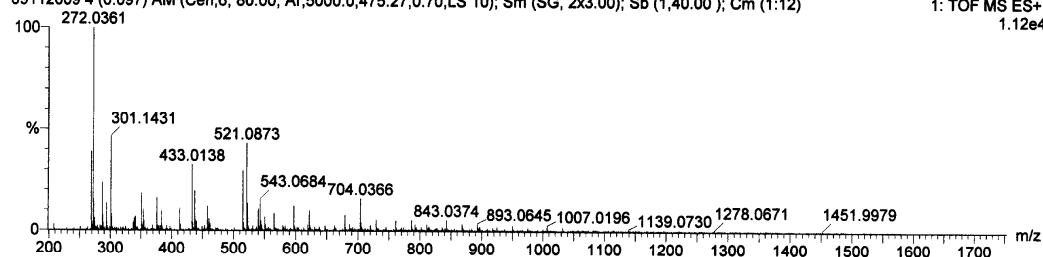

Minimum: -1.5  
Maximum: 5.0 5.0 100.0

| Mass     | Calc. Mass | mDa | PPM | DBE | i-FIT | Formula           |
|----------|------------|-----|-----|-----|-------|-------------------|
| 272.0361 | 272.0357   | 0.4 | 1.5 | 7.5 | 3.0   | C12 H11 N O3 Na S |

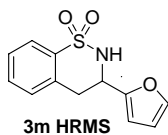

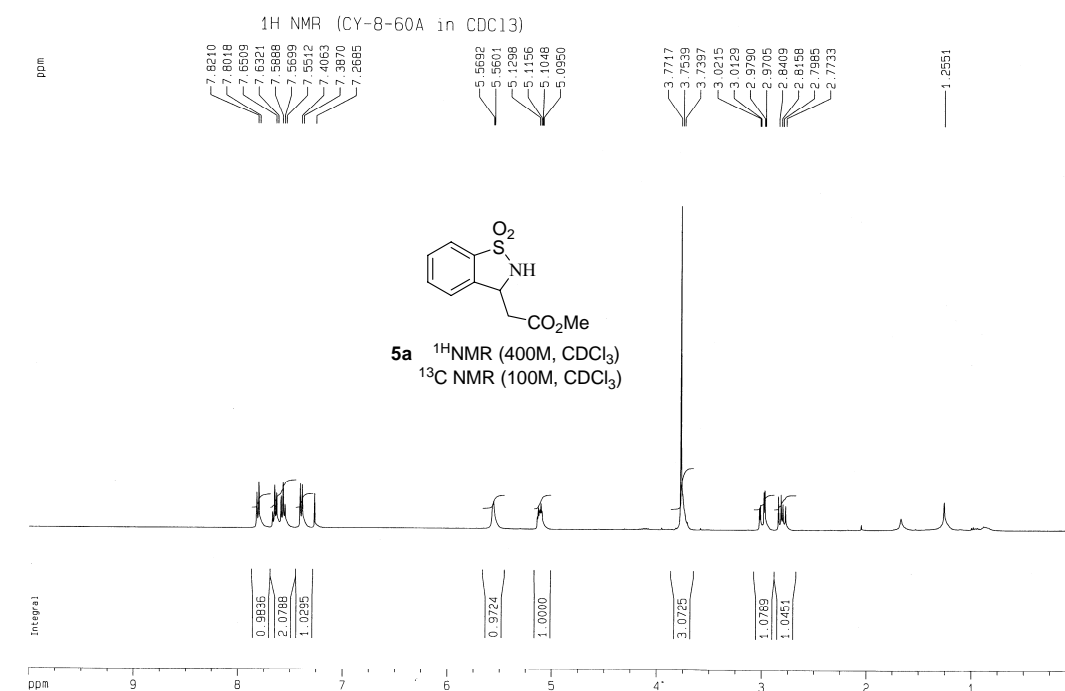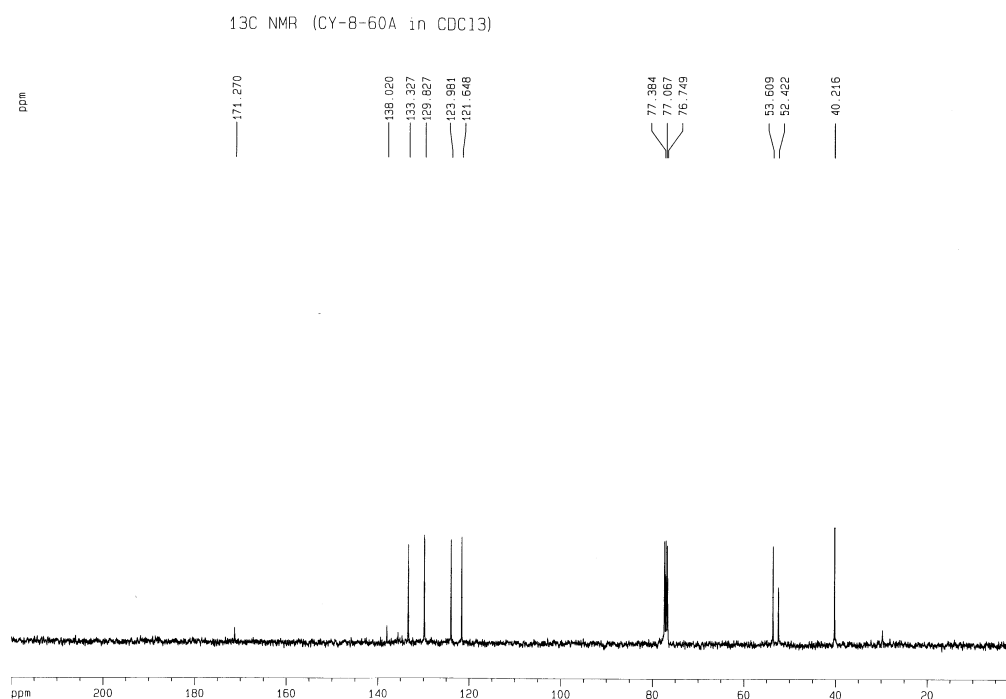

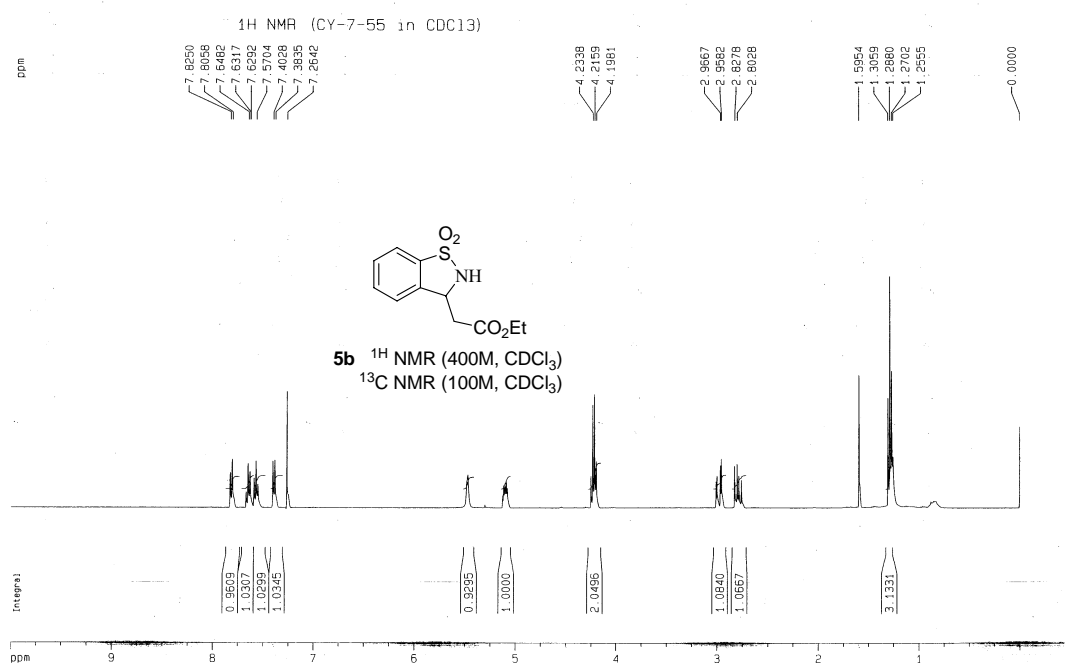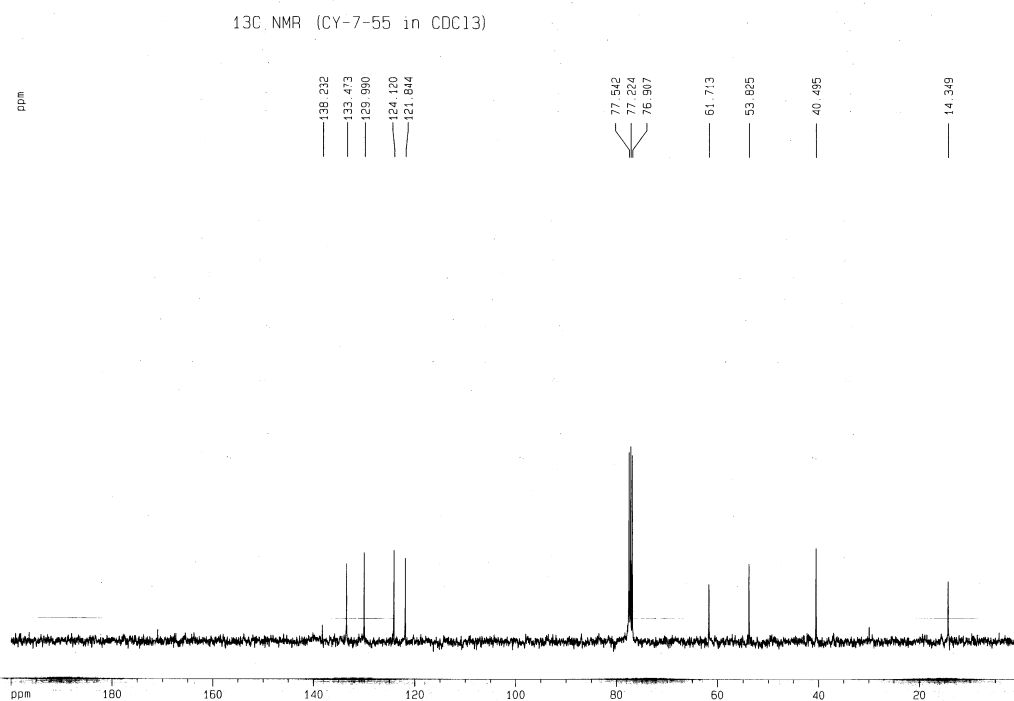

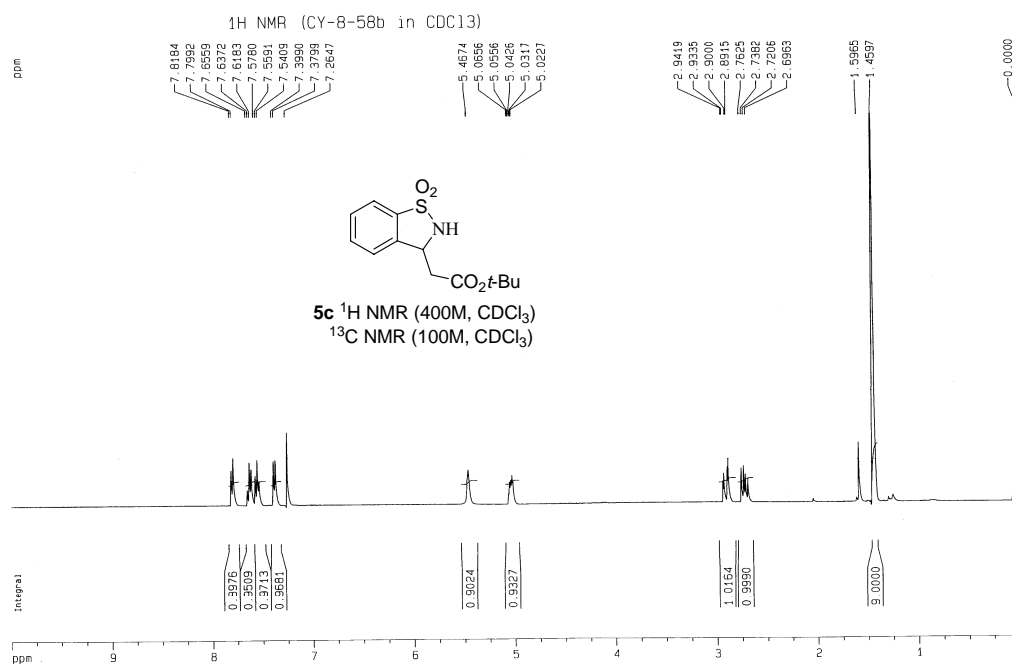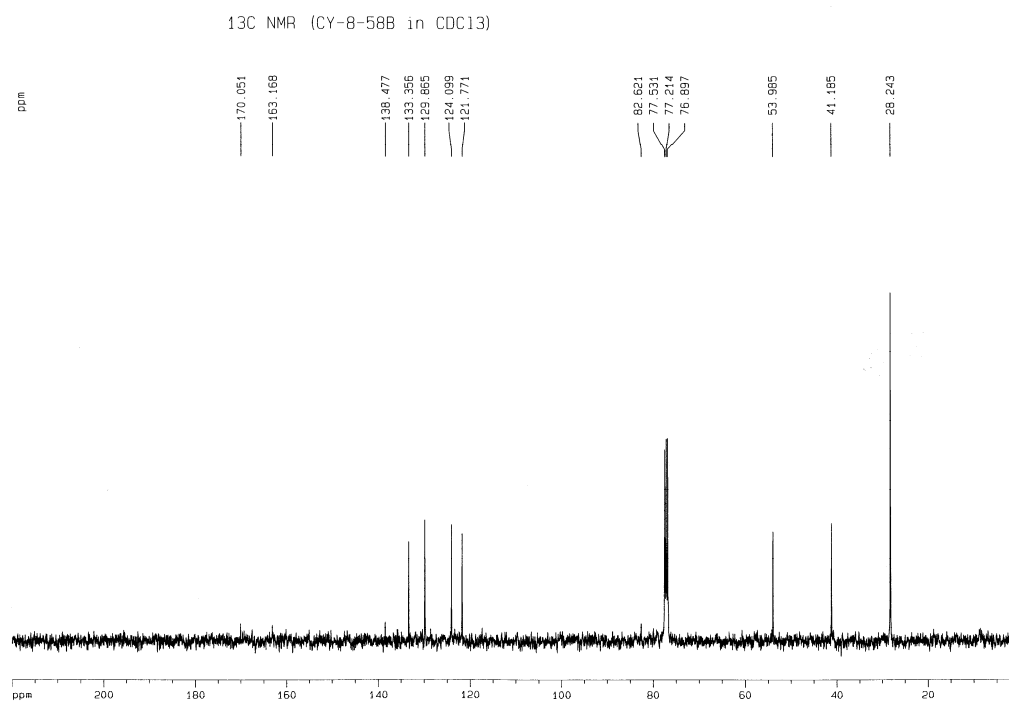

# Elemental Composition Report

Page 1

## Single Mass Analysis

Tolerance = 50.0 PPM / DBE: min = -1.5, max = 100.0

Selected filters: None

Monoisotopic Mass, Even Electron Ions

2 formula(e) evaluated with 1 results within limits (all results (up to 1000) for each mass)

Elements Used:

C: 10-76 H: 8-80 N: 1-1 O: 4-4 Na: 1-1 S: 1-1

QC-8-58B

09112024 26 (0.675) AM (Cen,6, 80.00, Ar,5000.0,475.27,0.70,LS 10); Sm (SG, 2x3.00); Sb (1,40.00 ); Cm (13:43)

1: TOF MS ES+  
1.45e4

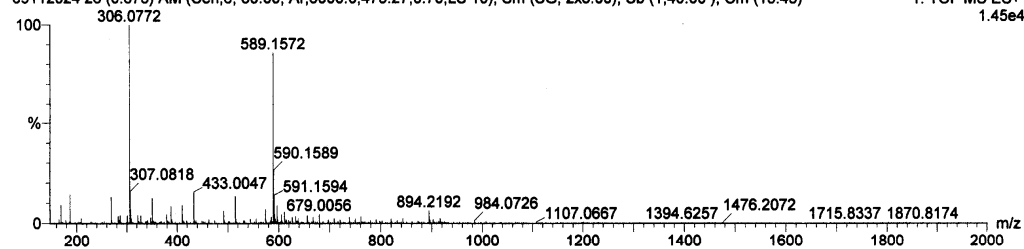

Minimum: -1.5  
Maximum: 100.0

| Mass     | Calc. Mass | mDa  | PPM  | DBE | i-FIT | Formula           |
|----------|------------|------|------|-----|-------|-------------------|
| 306.0772 | 306.0776   | -0.4 | -1.3 | 5.5 | 4.2   | C13 H17 N O4 Na S |

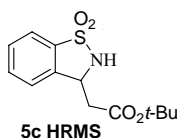

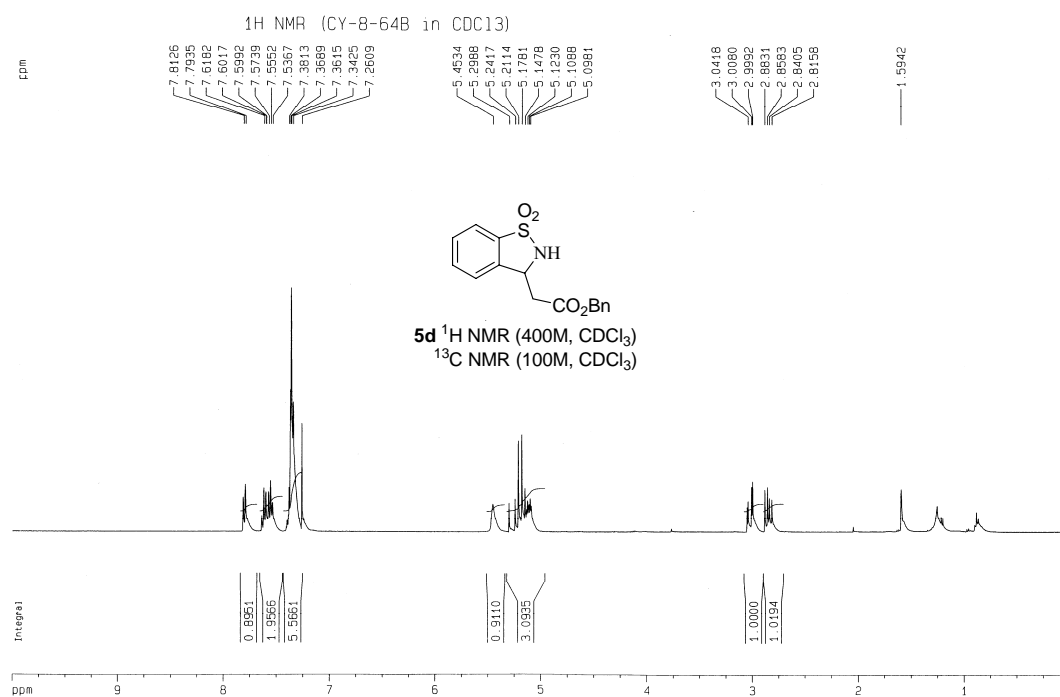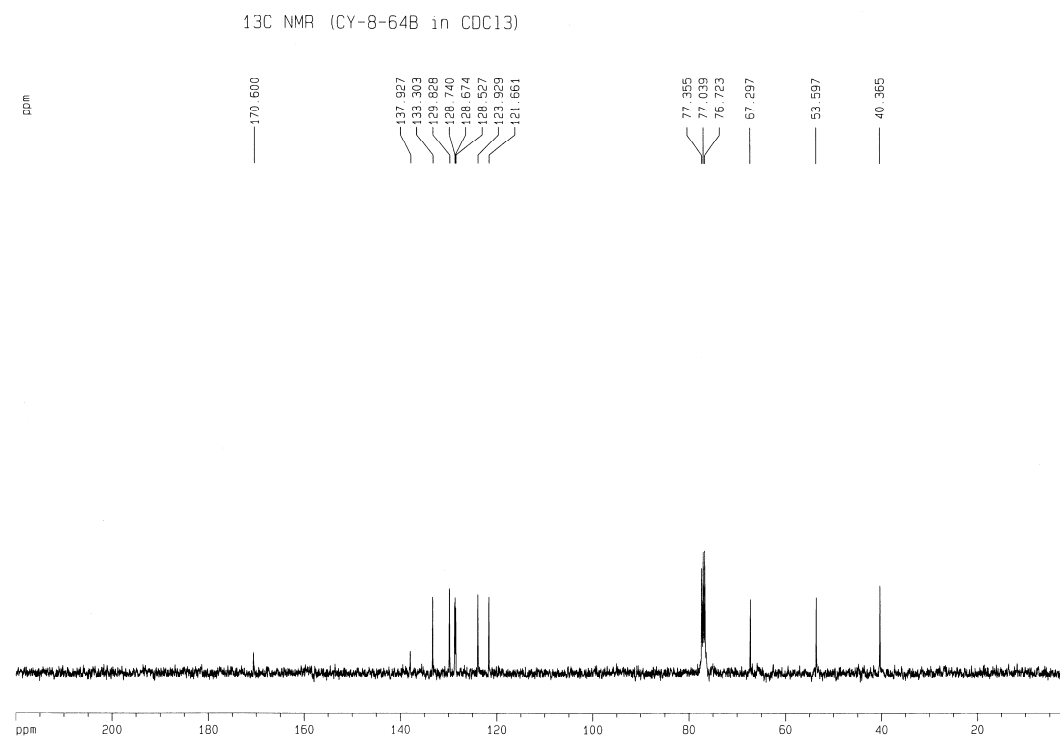

# Elemental Composition Report

Page 1

## Single Mass Analysis

Tolerance = 5.0 PPM / DBE: min = -1.5, max = 100.0

Selected filters: None

Monoisotopic Mass, Odd and Even Electron Ions

22 formula(e) evaluated with 1 results within limits (all results (up to 1000) for each mass)

Elements Used:

C: 10-76 H: 10-80 N: 1-3 O: 4-6 Na: 1-1 S: 1-1

CY-8-64B

09112006 22 (0.561) AM (Cen,6, 80.00, Ar,5000.0,475.27,0.70,LS 10); Sm (SG, 2x3.00); Sb (1,40.00); Cm (14:43)

1: TOF MS ES+  
3.91e4

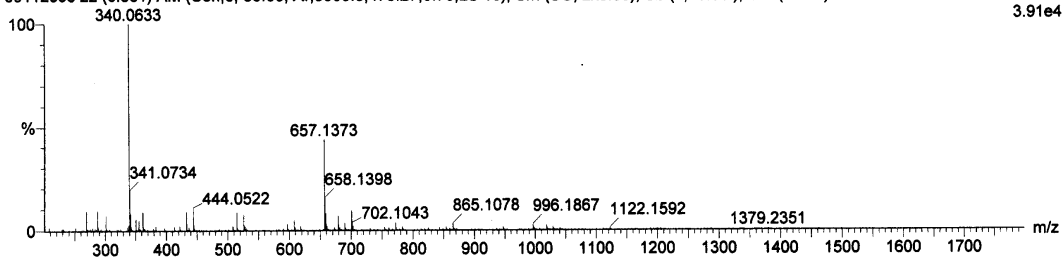

Minimum: -1.5  
Maximum: 5.0 5.0 100.0

| Mass     | Calc. Mass | mDa | PPM | DBE | i-FIT | Formula           |
|----------|------------|-----|-----|-----|-------|-------------------|
| 340.0633 | 340.0619   | 1.4 | 4.1 | 9.5 | 38.8  | C16 H15 N O4 Na S |

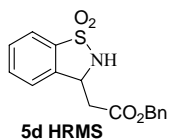



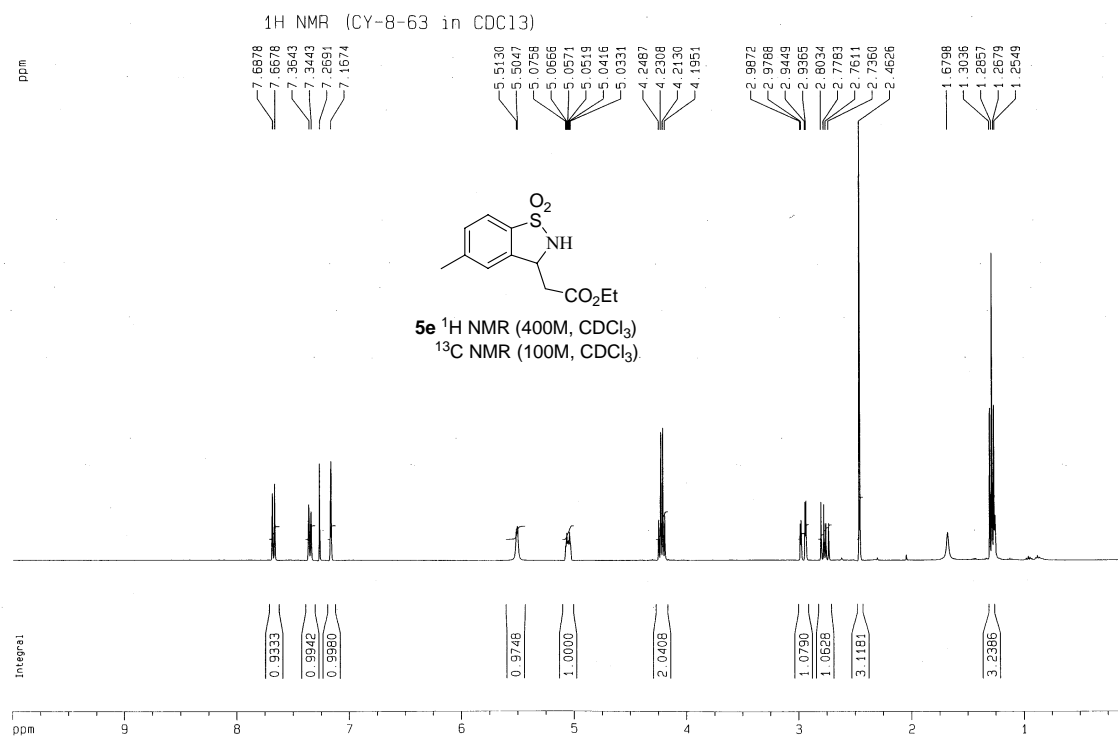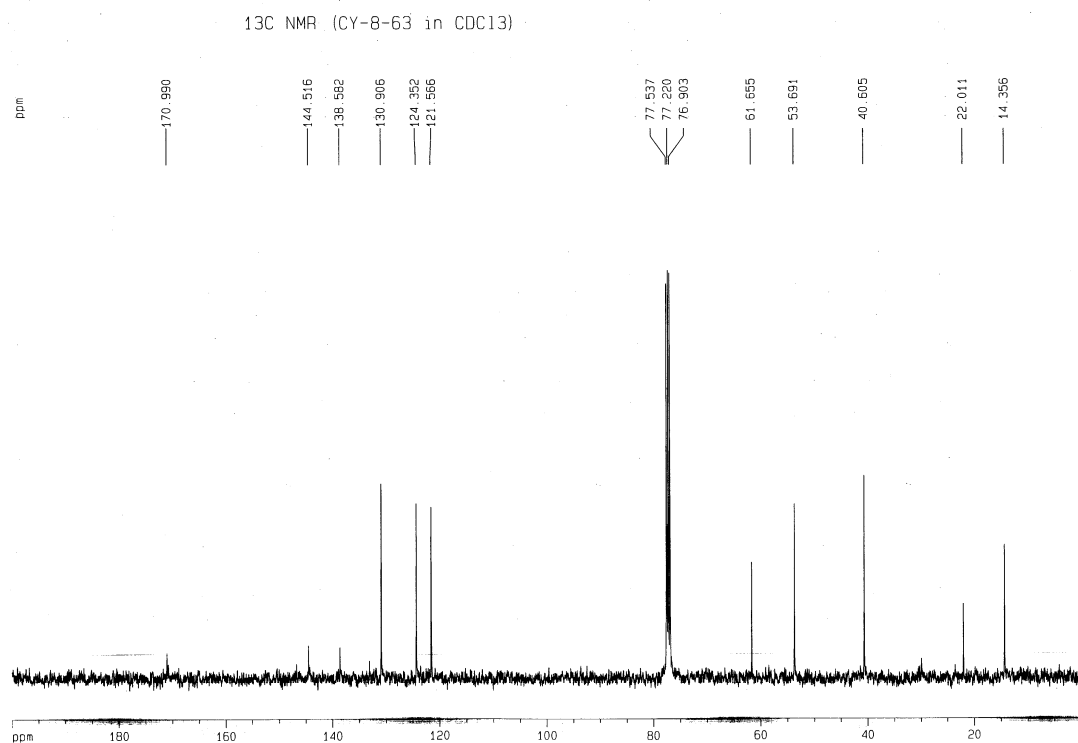

# Elemental Composition Report

Page 1

## Single Mass Analysis

Tolerance = 5.0 PPM / DBE: min = -1.5, max = 100.0

Selected filters: None

Monoisotopic Mass, Odd and Even Electron Ions

9 formula(e) evaluated with 1 results within limits (all results (up to 1000) for each mass)

Elements Used:

C: 10-76 H: 10-80 N: 1-3 O: 4-6 Na: 1-1 S: 1-1

CY-8-72

09112007 13 (0.350) AM (Cen,6, 80.00, Ar,5000.0,475.27,0.70,LS 10); Sm (SG, 2x3.00); Sb (1,40.00 ); Cm (6:18)

1: TOF MS ES+  
1.15e4

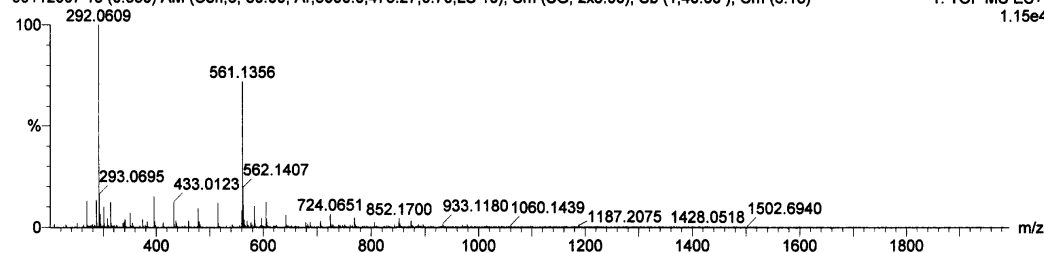

Minimum: -1.5  
Maximum: 100.0

| Mass     | Calc. Mass | mDa  | PPM  | DBE | i-FIT | Formula           |
|----------|------------|------|------|-----|-------|-------------------|
| 292.0609 | 292.0619   | -1.0 | -3.4 | 5.5 | 6.8   | C12 H15 N O4 Na S |

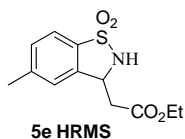

Supplementary Material (ESI) for Chemical Communications  
This journal is (c) The Royal Society of Chemistry 2011

Data File C:\HPCHEM\1\DATA\ZHOU-09\YZ006325.D

Sample Name: CY-7-81 (+/-) Data File C:\HPCHEM\1\DATA\ZHOU-09\YZ006387.D

Sample Name: CY-8-13

OD-H, H/i-PrOH = 70/30, 0.8 mL/min

OD-H, H/i-PrOH = 70/30, 0.7 mL/min

=====  
Injection Date : 4/21/2009 4:18:00 PM  
Sample Name : CY-7-81 (+/-) Location : Vial 1  
Acq. Operator : WANG  
Acq. Method : C:\HPCHEM\1\METHODS\2012.M  
Last changed : 4/21/2009 4:16:30 PM by WANG  
(modified after loading)  
Analysis Method : C:\HPCHEM\1\METHODS\2012.M  
Last changed : 10/19/2009 11:19:04 AM  
(modified after loading)

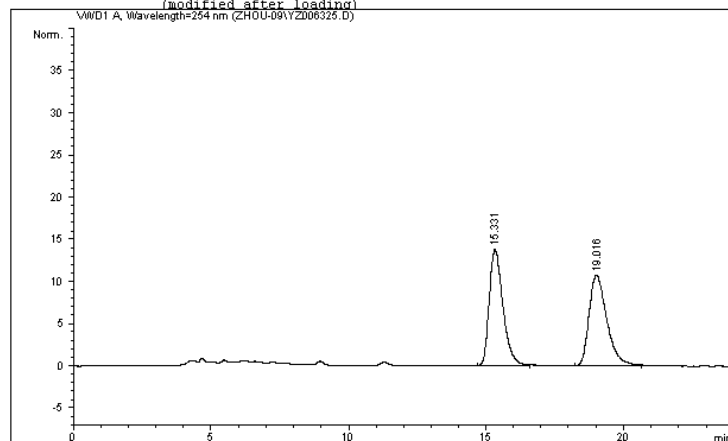

Area Percent Report

Sorted By : Signal  
Multiplier : 1.0000  
Dilution : 1.0000

Signal 1: VWD1 A, Wavelength=254 nm

| Peak # | RetTime [min] | Type | Width [min] | Area mAU  | *s | Height [mAU] | Area %  |
|--------|---------------|------|-------------|-----------|----|--------------|---------|
| 1      | 15.331        | PB   | 0.5215      | 473.68723 |    | 13.74377     | 49.9676 |
| 2      | 19.016        | BB   | 0.6858      | 474.30237 |    | 10.70506     | 50.0324 |

Totals : 947.98959 24.44883

Results obtained with enhanced integrator!

\*\*\* End of Report \*\*\*

=====  
Injection Date : 6/2/2009 11:03:57 AM  
Sample Name : CY-8-13 Location : Vial 1  
Acq. Operator : WANG  
Acq. Method : C:\HPCHEM\1\METHODS\2012.M  
Last changed : 6/2/2009 10:52:53 AM by WANG  
(modified after loading)  
Analysis Method : C:\HPCHEM\1\METHODS\2012.M  
Last changed : 10/19/2009 11:18:57 AM  
(modified after loading)

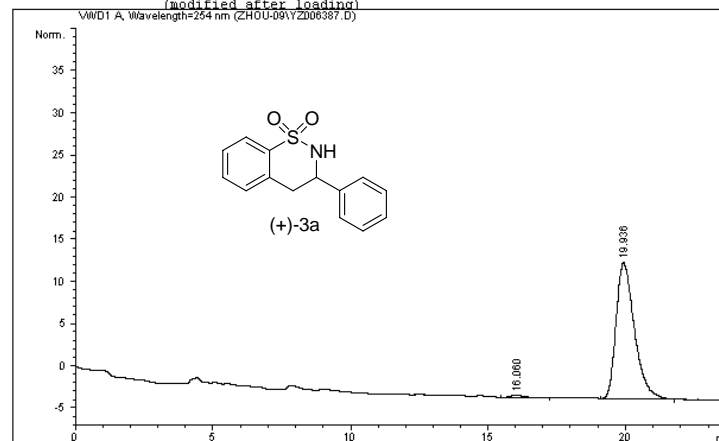

Area Percent Report

Sorted By : Signal  
Multiplier : 1.0000  
Dilution : 1.0000

Signal 1: VWD1 A, Wavelength=254 nm

| Peak # | RetTime [min] | Type | Width [min] | Area mAU  | *s         | Height [mAU] | Area %  |
|--------|---------------|------|-------------|-----------|------------|--------------|---------|
| 1      | 16.060        | PB   | 0.3775      | 7.06317   | 2.23437e-1 |              | 0.9309  |
| 2      | 19.938        | PP   | 0.7129      | 751.70172 |            | 16.12078     | 99.0691 |

Totals : 758.76489 16.34421

Results obtained with enhanced integrator!

\*\*\* End of Report \*\*\*

Supplementary Material (ESI) for Chemical Communications  
This journal is (c) The Royal Society of Chemistry 2011

Data File C:\HPCHEM\1\DATA\ZHOU-09\Y2006542.D

Sample Name: CY-8-41A(+/-) Data File C:\HPCHEM\1\DATA\ZHOU-09\Y2006543.D

Sample Name: CY-8-38A

OD-H, H/i-PrOH = 70/30, 0.7 mL/min

OD-H, H/i-PrOH = 70/30, 0.7 mL/min

=====

Injection Date : 7/13/2009 4:27:06 PM  
Sample Name : CY-8-41A(+/-) Location : Vial 1  
Acq. Operator : WANG  
Acq. Method : C:\HPCHEM\1\METHODS\2012.M  
Last changed : 7/13/2009 4:25:13 PM by WANG  
(modified after loading)  
Analysis Method : C:\HPCHEM\1\METHODS\2012.M  
Last changed : 10/19/2009 10:41:40 AM  
(modified after loading)

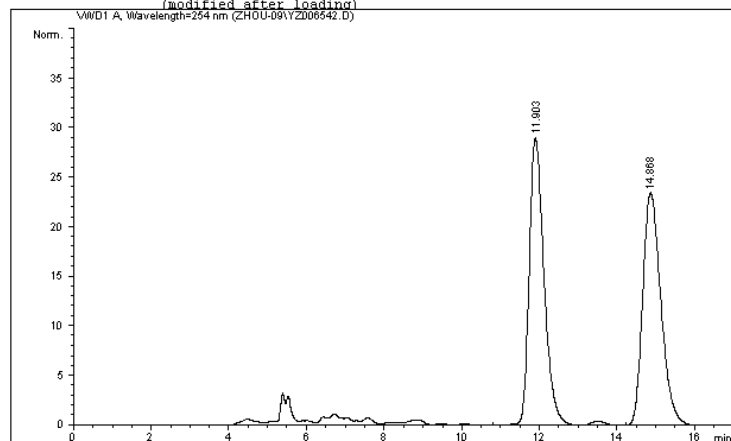

Area Percent Report

Sorted By : Signal  
Multiplier : 1.0000  
Dilution : 1.0000

Signal 1: VWD1 A, Wavelength=254 nm

| Peak # | RetTime [min] | Type | Width [min] | Area mAU  | s | Height [mAU] | Area %  |
|--------|---------------|------|-------------|-----------|---|--------------|---------|
| 1      | 11.903        | BB   | 0.4079      | 787.06458 |   | 29.17456     | 50.2003 |
| 2      | 14.868        | BB   | 0.5078      | 780.78528 |   | 23.62893     | 49.7997 |

Totals : 1567.84985 52.80349

Results obtained with enhanced integrator!

\*\*\* End of Report \*\*\*

=====

Injection Date : 7/13/2009 4:49:53 PM  
Sample Name : CY-8-38A Location : Vial 1  
Acq. Operator : WANG  
Acq. Method : C:\HPCHEM\1\METHODS\2012.M  
Last changed : 7/13/2009 4:45:01 PM by WANG  
(modified after loading)  
Analysis Method : C:\HPCHEM\1\METHODS\2012.M  
Last changed : 10/19/2009 10:46:24 AM  
(modified after loading)

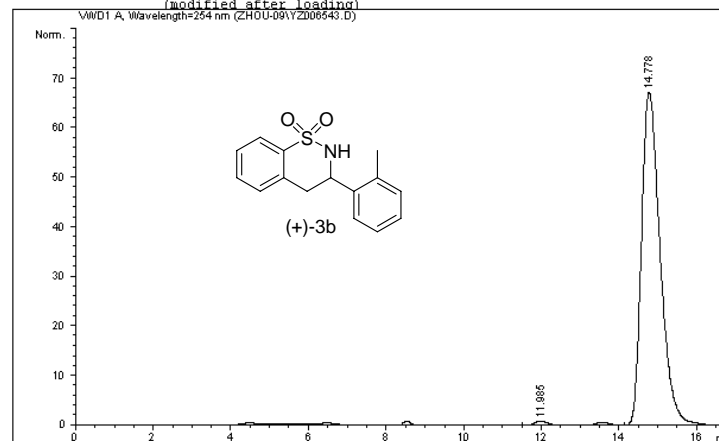

Area Percent Report

Sorted By : Signal  
Multiplier : 1.0000  
Dilution : 1.0000

Signal 1: VWD1 A, Wavelength=254 nm

| Peak # | RetTime [min] | Type | Width [min] | Area mAU   | s | Height [mAU] | Area %  |
|--------|---------------|------|-------------|------------|---|--------------|---------|
| 1      | 11.985        | BB   | 0.3724      | 21.83636   |   | 7.96275e-1   | 0.9651  |
| 2      | 14.778        | VB   | 0.5105      | 2240.75415 |   | 67.33521     | 99.0349 |

Totals : 2262.59051 68.13148

Results obtained with enhanced integrator!

\*\*\* End of Report \*\*\*

Supplementary Material (ESI) for Chemical Communications  
This journal is (c) The Royal Society of Chemistry 2011

Data File C:\HPCHEM\1\DATA\ZHOU-09\Y2006529.D

Sample Name: CY-8-60C Data File C:\HPCHEM\1\DATA\ZHOU-09\Y2006528.D

Sample Name: CY-8-59A

OD-H, H/i-PrOH = 70/30, 0.7 mL/min

OD-H, H/i-PrOH = 70/30, 0.7 mL/min

=====  
Injection Date : 7/11/2009 11:33:30 AM  
Sample Name : CY-8-60C Location : Vial 1  
Acq. Operator : WANG  
Acq. Method : C:\HPCHEM\1\METHODS\2012.M  
Last changed : 7/11/2009 11:30:58 AM by WANG  
(modified after loading)  
Analysis Method : C:\HPCHEM\1\METHODS\2012.M  
Last changed : 10/19/2009 10:52:24 AM  
(modified after loading)

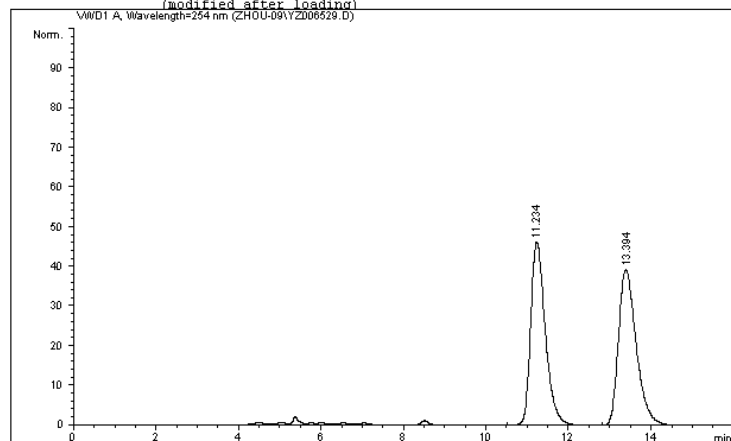

=====  
Area Percent Report  
=====

Sorted By : Signal  
Multiplier : 1.0000  
Dilution : 1.0000

Signal 1: VWD1 A, Wavelength=254 nm

| Peak # | RetTime [min] | Type | Width [min] | Area mAU   | *s | Height [mAU] | Area %  |
|--------|---------------|------|-------------|------------|----|--------------|---------|
| 1      | 11.234        | BB   | 0.3806      | 1150.45117 |    | 46.23342     | 49.1333 |
| 2      | 13.394        | BB   | 0.4643      | 1191.03967 |    | 39.29092     | 50.8667 |

Totals : 2341.49084 85.52434

Results obtained with enhanced integrator!

\*\*\* End of Report \*\*\*

=====  
Injection Date : 7/11/2009 11:14:59 AM  
Sample Name : CY-8-59A Location : Vial 1  
Acq. Operator : WANG  
Acq. Method : C:\HPCHEM\1\METHODS\2012.M  
Last changed : 7/11/2009 11:13:58 AM by WANG  
(modified after loading)  
Analysis Method : C:\HPCHEM\1\METHODS\2012.M  
Last changed : 10/19/2009 10:53:53 AM  
(modified after loading)

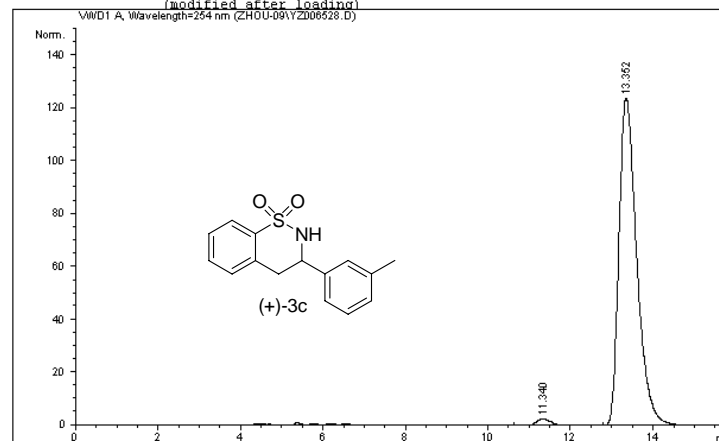

=====  
Area Percent Report  
=====

Sorted By : Signal  
Multiplier : 1.0000  
Dilution : 1.0000

Signal 1: VWD1 A, Wavelength=254 nm

| Peak # | RetTime [min] | Type | Width [min] | Area mAU   | *s | Height [mAU] | Area %  |
|--------|---------------|------|-------------|------------|----|--------------|---------|
| 1      | 11.340        | BB   | 0.3963      | 67.84648   |    | 2.58672      | 1.7795  |
| 2      | 13.352        | PB   | 0.4603      | 3744.81104 |    | 123.91671    | 98.2205 |

Totals : 3812.65752 126.50343

Results obtained with enhanced integrator!

\*\*\* End of Report \*\*\*

Supplementary Material (ESI) for Chemical Communications  
This journal is (c) The Royal Society of Chemistry 2011

Data File C:\HPCHEM\1\DATA\ZHOU-09\Y2006415.D

Sample Name: CY-8-36B Data File C:\HPCHEM\1\DATA\ZHOU-09\Y2006416.D

Sample Name: CY-8-37A

OD-H, H/i-PrOH = 70/30, 0.7 mL/min

OD-H, H/i-PrOH = 70/30, 0.7 mL/min

=====  
Injection Date : 6/18/2009 9:56:23 AM  
Sample Name : CY-8-36B Location : Vial 1  
Acq. Operator : WANG  
Acq. Method : C:\HPCHEM\1\METHODS\2012.M  
Last changed : 6/18/2009 9:54:53 AM by WANG  
(modified after loading)  
Analysis Method : C:\HPCHEM\1\METHODS\2012.M  
Last changed : 10/19/2009 11:13:32 AM  
(modified after loading)

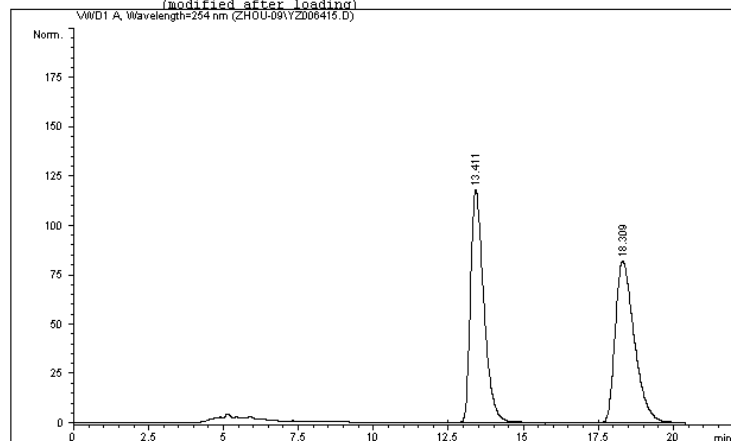

=====  
Area Percent Report  
=====

Sorted By : Signal  
Multiplier : 1.0000  
Dilution : 1.0000

Signal 1: VWD1 A, Wavelength=254 nm

| Peak # | RetTime [min] | Type | Width [min] | Area mAU   | *s | Height [mAU] | Area %  |
|--------|---------------|------|-------------|------------|----|--------------|---------|
| 1      | 13.411        | VB   | 0.4700      | 3658.53223 |    | 117.82305    | 50.0305 |
| 2      | 18.309        | BBA  | 0.6795      | 3654.07251 |    | 82.08787     | 49.9695 |

Totals : 7312.60474 199.91092

Results obtained with enhanced integrator!

\*\*\* End of Report \*\*\*

=====  
Injection Date : 6/18/2009 10:18:28 AM  
Sample Name : CY-8-37A Location : Vial 1  
Acq. Operator : WANG  
Acq. Method : C:\HPCHEM\1\METHODS\2012.M  
Last changed : 6/18/2009 10:16:59 AM by WANG  
(modified after loading)  
Analysis Method : C:\HPCHEM\1\METHODS\2012.M  
Last changed : 10/19/2009 11:14:50 AM  
(modified after loading)

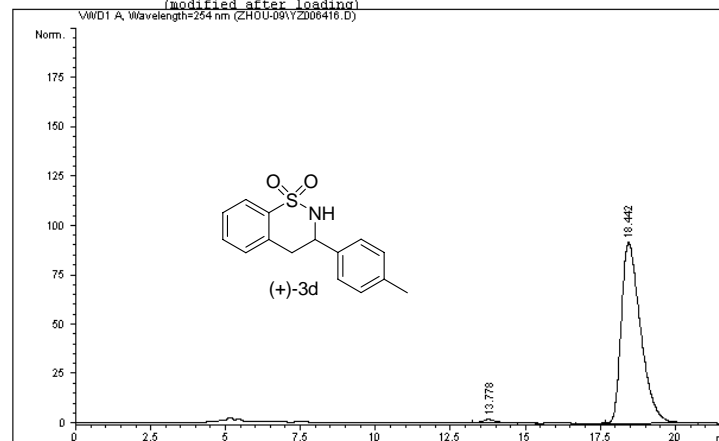

=====  
Area Percent Report  
=====

Sorted By : Signal  
Multiplier : 1.0000  
Dilution : 1.0000

Signal 1: VWD1 A, Wavelength=254 nm

| Peak # | RetTime [min] | Type | Width [min] | Area mAU   | *s | Height [mAU] | Area %  |
|--------|---------------|------|-------------|------------|----|--------------|---------|
| 1      | 13.778        | BB   | 0.4825      | 58.99335   |    | 1.82257      | 1.4172  |
| 2      | 18.442        | BB   | 0.6834      | 4103.72070 |    | 91.50468     | 98.5828 |

Totals : 4162.71405 93.32725

Results obtained with enhanced integrator!

\*\*\* End of Report \*\*\*

Supplementary Material (ESI) for Chemical Communications  
This journal is (c) The Royal Society of Chemistry 2011

Data File C:\HPCHEM\1\DATA\ZHOU-09\Y2006520.D

Sample Name: CY-8-41B(+/-) Data File C:\HPCHEM\1\DATA\ZHOU-09\Y2006525.D

Sample Name: CY-8-38B

OD-H, H/i-PrOH = 70/30, 0.7 mL/min

OD-H, H/i-PrOH = 70/30, 0.7 mL/min

Injection Date : 7/10/2009 3:02:55 PM  
Sample Name : CY-8-41B(+/-) Location : Vial 1  
Acq. Operator : WANG  
Acq. Method : C:\HPCHEM\1\METHODS\2012.M  
Last changed : 7/10/2009 3:00:20 PM by WANG  
(modified after loading)  
Analysis Method : C:\HPCHEM\1\METHODS\2012.M  
Last changed : 10/19/2009 10:59:40 AM  
(modified after loading)

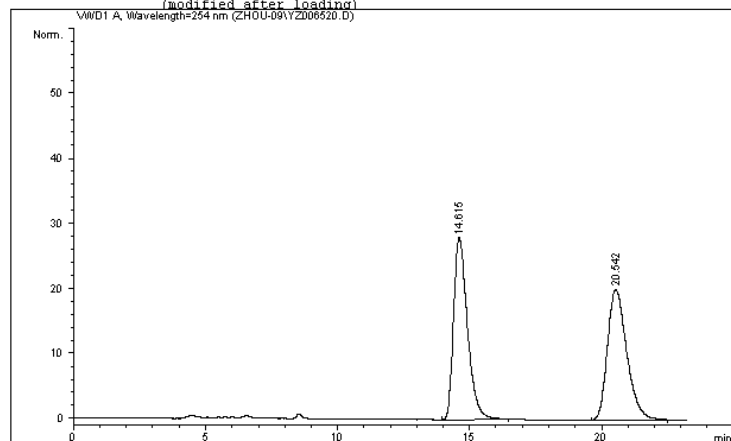

Area Percent Report

Sorted By : Signal  
Multiplier : 1.0000  
Dilution : 1.0000

Signal 1: VWD1 A, Wavelength=254 nm

| Peak # | RetTime [min] | Type | Width [min] | Area mAU   | *s | Height [mAU] | Area %  |
|--------|---------------|------|-------------|------------|----|--------------|---------|
| 1      | 14.615        | PB   | 0.5572      | 1022.07184 |    | 27.98180     | 49.9524 |
| 2      | 20.542        | BB   | 0.7763      | 1024.01990 |    | 20.05411     | 50.0476 |

Totals : 2046.09174 48.03591

Results obtained with enhanced integrator!

\*\*\* End of Report \*\*\*

Injection Date : 7/10/2009 4:51:37 PM  
Sample Name : CY-8-38B Location : Vial 1  
Acq. Operator : WANG  
Acq. Method : C:\HPCHEM\1\METHODS\2012.M  
Last changed : 7/10/2009 4:45:28 PM by WANG  
(modified after loading)  
Analysis Method : C:\HPCHEM\1\METHODS\2012.M  
Last changed : 10/19/2009 10:59:48 AM  
(modified after loading)

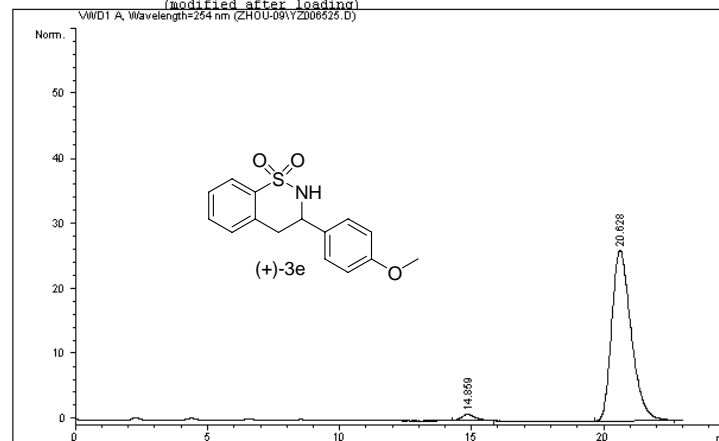

Area Percent Report

Sorted By : Signal  
Multiplier : 1.0000  
Dilution : 1.0000

Signal 1: VWD1 A, Wavelength=254 nm

| Peak # | RetTime [min] | Type | Width [min] | Area mAU   | *s         | Height [mAU] | Area % |
|--------|---------------|------|-------------|------------|------------|--------------|--------|
| 1      | 14.859        | BB   | 0.4755      | 34.42447   | 9.23731e-1 | 2.4949       |        |
| 2      | 20.628        | BB   | 0.7852      | 1345.37183 | 26.20942   | 97.5051      |        |

Totals : 1379.79630 27.13315

Results obtained with enhanced integrator!

\*\*\* End of Report \*\*\*

Supplementary Material (ESI) for Chemical Communications  
This journal is (c) The Royal Society of Chemistry 2011

Data File C:\HPCHEM\1\DATA\ZHOU-09\Y2006417.D

Sample Name: CY-8-36C Data File C:\HPCHEM\1\DATA\ZHOU-09\Y2006418.D

Sample Name: CY-8-37B

OD-H, H/i-PrOH = 70/30, 0.7 mL/min

OD-H, H/i-PrOH = 70/30, 0.7 mL/min

Injection Date : 6/18/2009 10:50:01 AM  
Sample Name : CY-8-36C Location : Vial 1  
Acq. Operator : WANG  
Acq. Method : C:\HPCHEM\1\METHODS\2012.M  
Last changed : 6/18/2009 10:48:28 AM by WANG  
(modified after loading)  
Analysis Method : C:\HPCHEM\1\METHODS\2012.M  
Last changed : 10/19/2009 11:10:58 AM  
(modified after loading)

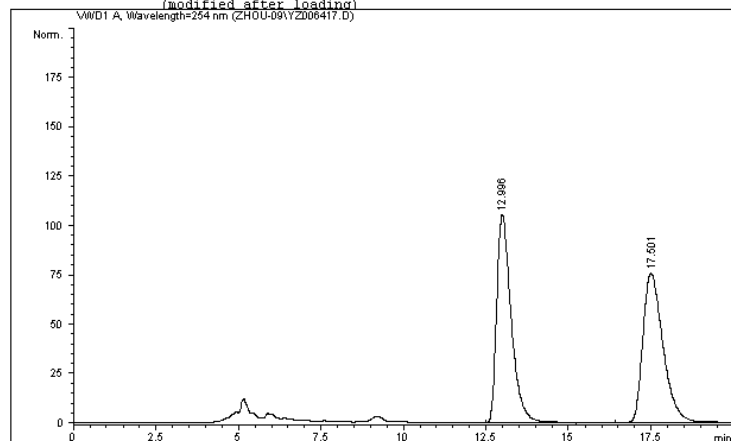

Area Percent Report

Sorted By : Signal  
Multiplier : 1.0000  
Dilution : 1.0000

Signal 1: VWD1 A, Wavelength=254 nm

| Peak # | RetTime [min] | Type | Width [min] | Area mAU   | *s | Height [mAU] | Area %  |
|--------|---------------|------|-------------|------------|----|--------------|---------|
| 1      | 12.996        | PP   | 0.4617      | 3198.27148 |    | 105.41691    | 49.9076 |
| 2      | 17.501        | BB   | 0.6494      | 3210.11914 |    | 75.64262     | 50.0924 |

Totals : 6408.39063 181.05953

Results obtained with enhanced integrator!

\*\*\* End of Report \*\*\*

Injection Date : 6/18/2009 11:12:28 AM  
Sample Name : CY-8-37B Location : Vial 1  
Acq. Operator : WANG  
Acq. Method : C:\HPCHEM\1\METHODS\2012.M  
Last changed : 6/18/2009 11:10:57 AM by WANG  
(modified after loading)  
Analysis Method : C:\HPCHEM\1\METHODS\2012.M  
Last changed : 10/19/2009 11:12:14 AM  
(modified after loading)

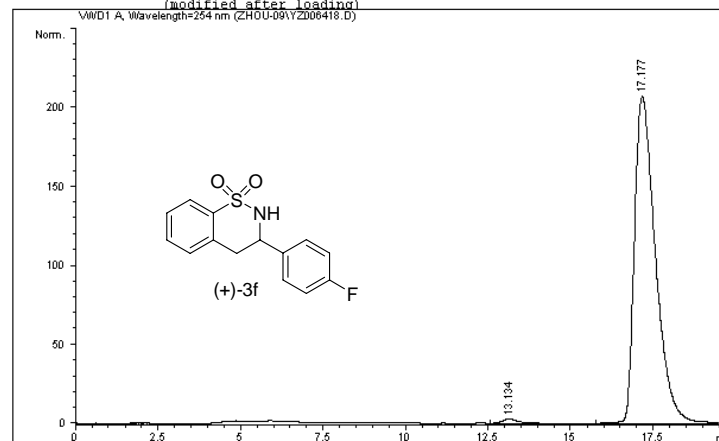

Area Percent Report

Sorted By : Signal  
Multiplier : 1.0000  
Dilution : 1.0000

Signal 1: VWD1 A, Wavelength=254 nm

| Peak # | RetTime [min] | Type | Width [min] | Area mAU   | *s | Height [mAU] | Area %  |
|--------|---------------|------|-------------|------------|----|--------------|---------|
| 1      | 13.134        | VB   | 0.4631      | 83.23767   |    | 2.66705      | 0.9085  |
| 2      | 17.177        | BBA  | 0.6721      | 9078.99414 |    | 206.89391    | 99.0915 |

Totals : 9162.23181 209.56096

Results obtained with enhanced integrator!

\*\*\* End of Report \*\*\*



Supplementary Material (ESI) for Chemical Communications  
This journal is (c) The Royal Society of Chemistry 2011

Data File C:\HPCHEM\1\DATA\ZHOU-09\Y2006487.D

Sample Name: CY-8-52A (+/-) Data File C:\HPCHEM\1\DATA\ZHOU-09\Y2006488.D

Sample Name: CY-8-53A

OD-H, H/i-PrOH = 70/30, 0.7 mL/min

OD-H, H/i-PrOH = 70/30, 0.7 mL/min

=====

Injection Date : 7/4/2009 10:52:44 AM  
Sample Name : CY-8-52A (+/-) Location : Vial 1  
Acq. Operator : WANG  
Acq. Method : C:\HPCHEM\1\METHODS\2012.M  
Last changed : 7/4/2009 10:46:43 AM by WANG  
(modified after loading)  
Analysis Method : C:\HPCHEM\1\METHODS\2012.M  
Last changed : 10/19/2009 11:08:13 AM  
(modified after loading)

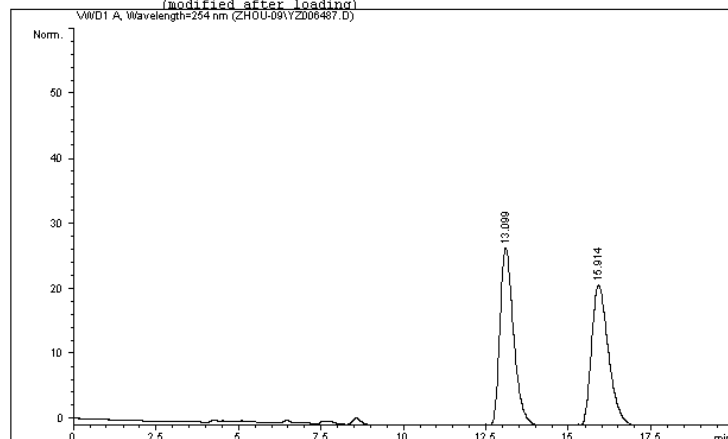

Area Percent Report

Sorted By : Signal  
Multiplier : 1.0000  
Dilution : 1.0000

Signal 1: VWD1 A, Wavelength=254 nm

| Peak # | RetTime [min] | Type | Width [min] | Area mAU  | *s | Height [mAU] | Area %  |
|--------|---------------|------|-------------|-----------|----|--------------|---------|
| 1      | 13.099        | VB   | 0.4416      | 793.50446 |    | 27.49201     | 50.2153 |
| 2      | 15.914        | VBA  | 0.5517      | 786.70056 |    | 21.81926     | 49.7847 |

Totals : 1580.20502 49.31127

Results obtained with enhanced integrator!

\*\*\* End of Report \*\*\*

=====

Injection Date : 7/4/2009 11:15:12 AM  
Sample Name : CY-8-53A Location : Vial 1  
Acq. Operator : WANG  
Acq. Method : C:\HPCHEM\1\METHODS\2012.M  
Last changed : 7/4/2009 11:10:25 AM by WANG  
(modified after loading)  
Analysis Method : C:\HPCHEM\1\METHODS\2012.M  
Last changed : 10/19/2009 11:09:34 AM  
(modified after loading)

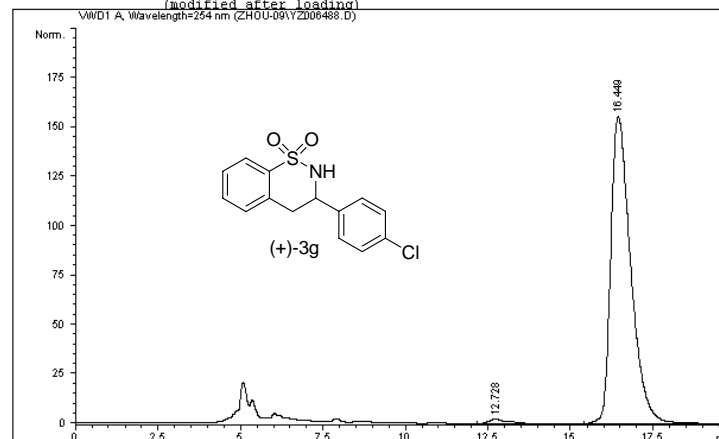

Area Percent Report

Sorted By : Signal  
Multiplier : 1.0000  
Dilution : 1.0000

Signal 1: VWD1 A, Wavelength=254 nm

| Peak # | RetTime [min] | Type | Width [min] | Area mAU   | *s | Height [mAU] | Area %  |
|--------|---------------|------|-------------|------------|----|--------------|---------|
| 1      | 12.728        | BB   | 0.5302      | 80.08139   |    | 2.09599      | 1.2097  |
| 2      | 16.449        | BB   | 0.6386      | 6539.97900 |    | 155.68066    | 98.7903 |

Totals : 6620.06039 157.77665

Results obtained with enhanced integrator!

\*\*\* End of Report \*\*\*

Supplementary Material (ESI) for Chemical Communications  
This journal is (c) The Royal Society of Chemistry 2011

Data File C:\HPCHEM\1\DATA\ZHOU-09\Y2006522.D

Sample Name: CY-8-55A(+/-) Data File C:\HPCHEM\1\DATA\ZHOU-09\Y2006523.D

Sample Name: CY-8-57A

OD-H, H/i-PrOH = 70/30, 0.7 mL/min

OD-H, H/i-PrOH = 70/30, 0.7 mL/min

Injection Date : 7/10/2009 3:58:28 PM  
Sample Name : CY-8-55A(+/-) Location : Vial 1  
Acq. Operator : WANG  
Acq. Method : C:\HPCHEM\1\METHODS\2012.M  
Last changed : 7/10/2009 3:54:14 PM by WANG  
(modified after loading)  
Analysis Method : C:\HPCHEM\1\METHODS\2012.M  
Last changed : 10/19/2009 10:56:13 AM  
(modified after loading)

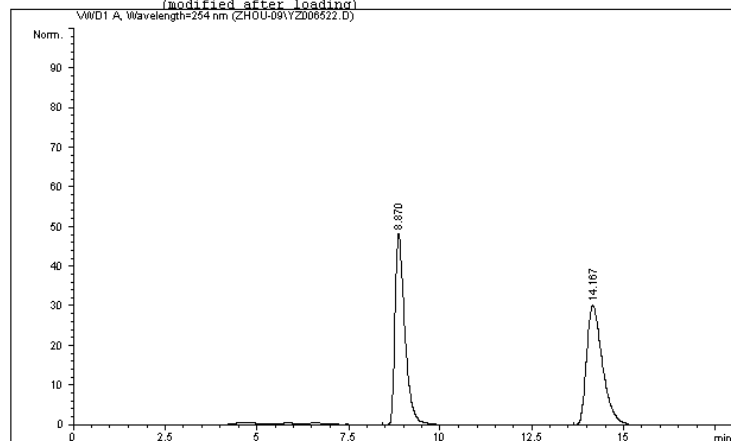

Area Percent Report

Sorted By : Signal  
Multiplier : 1.0000  
Dilution : 1.0000

Signal 1: VWD1 A, Wavelength=254 nm

| Peak # | RetTime [min] | Type | Width [min] | Area mAU  | *s | Height [mAU] | Area %  |
|--------|---------------|------|-------------|-----------|----|--------------|---------|
| 1      | 8.870         | PB   | 0.2866      | 906.81799 |    | 48.16644     | 48.7649 |
| 2      | 14.167        | BP   | 0.4740      | 952.75482 |    | 30.59462     | 51.2351 |

Totals : 1859.57281 78.76106

Results obtained with enhanced integrator!

\*\*\* End of Report \*\*\*

Injection Date : 7/10/2009 4:24:26 PM  
Sample Name : CY-8-57A Location : Vial 1  
Acq. Operator : WANG  
Acq. Method : C:\HPCHEM\1\METHODS\2012.M  
Last changed : 7/10/2009 4:18:40 PM by WANG  
(modified after loading)  
Analysis Method : C:\HPCHEM\1\METHODS\2012.M  
Last changed : 10/19/2009 10:56:17 AM  
(modified after loading)

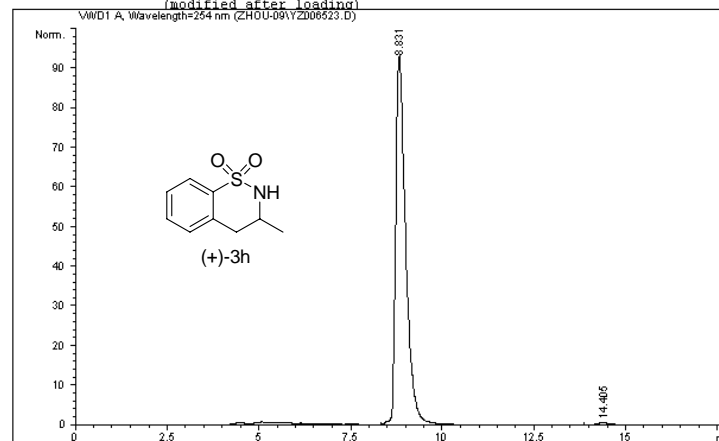

Area Percent Report

Sorted By : Signal  
Multiplier : 1.0000  
Dilution : 1.0000

Signal 1: VWD1 A, Wavelength=254 nm

| Peak # | RetTime [min] | Type | Width [min] | Area mAU   | *s | Height [mAU] | Area %  |
|--------|---------------|------|-------------|------------|----|--------------|---------|
| 1      | 8.831         | BB   | 0.2905      | 1780.38965 |    | 92.94349     | 99.0163 |
| 2      | 14.405        | PB   | 0.3906      | 17.68837   |    | 5.44513e-1   | 0.9837  |

Totals : 1798.07802 93.48800

Results obtained with enhanced integrator!

\*\*\* End of Report \*\*\*

Supplementary Material (ESI) for Chemical Communications  
This journal is (c) The Royal Society of Chemistry 2011

Data File C:\HPCHEM\1\DATA\ZHOU-09\Y2006330.D

Sample Name: CY-7-87 (+/-) Data File C:\HPCHEM\1\DATA\ZHOU-09\Y2006412.D

Sample Name: CY-8-33A

OD-H, H/i-PrOH = 70/30, 0.8 mL/min

OD-H, H/i-PrOH = 70/30, 0.7 mL/min

=====  
Injection Date : 4/24/2009 2:38:06 PM  
Sample Name : CY-7-87 (+/-) Location : Vial 1  
Acq. Operator : WANG  
Acq. Method : C:\HPCHEM\1\METHODS\2012.M  
Last changed : 4/24/2009 2:36:02 PM by WANG  
(modified after loading)  
Analysis Method : C:\HPCHEM\1\METHODS\2012.M  
Last changed : 10/19/2009 11:24:20 AM  
(modified after loading)

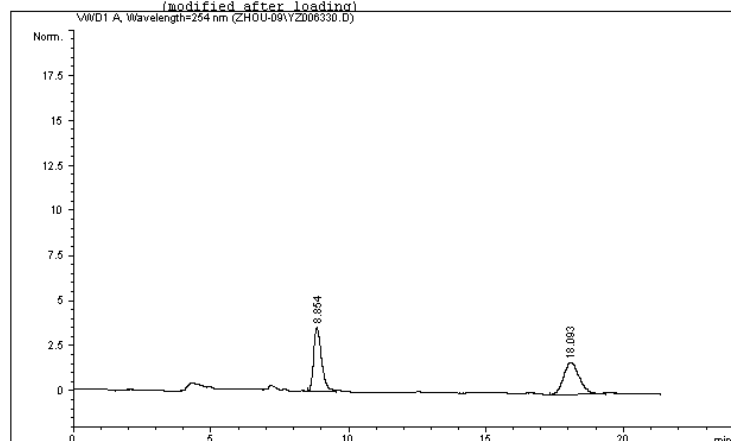

=====  
Area Percent Report  
=====

Sorted By : Signal  
Multiplier : 1.0000  
Dilution : 1.0000

Signal 1: VWD1 A, Wavelength=254 nm

| Peak # | RetTime [min] | Type | Width [min] | Area mAU | *s | Height [mAU] | Area %  |
|--------|---------------|------|-------------|----------|----|--------------|---------|
| 1      | 8.854         | BB   | 0.3028      | 69.04240 |    | 3.50286      | 49.7358 |
| 2      | 18.093        | PB   | 0.5171      | 69.77578 |    | 1.76304      | 50.2642 |

Totals : 138.81818 5.26591

Results obtained with enhanced integrator!

\*\*\* End of Report \*\*\*

=====  
Injection Date : 6/18/2009 8:54:13 AM  
Sample Name : CY-8-33A Location : Vial 1  
Acq. Operator : WANG  
Acq. Method : C:\HPCHEM\1\METHODS\2012.M  
Last changed : 6/18/2009 8:53:37 AM by WANG  
(modified after loading)  
Analysis Method : C:\HPCHEM\1\METHODS\2012.M  
Last changed : 10/19/2009 11:20:28 AM  
(modified after loading)

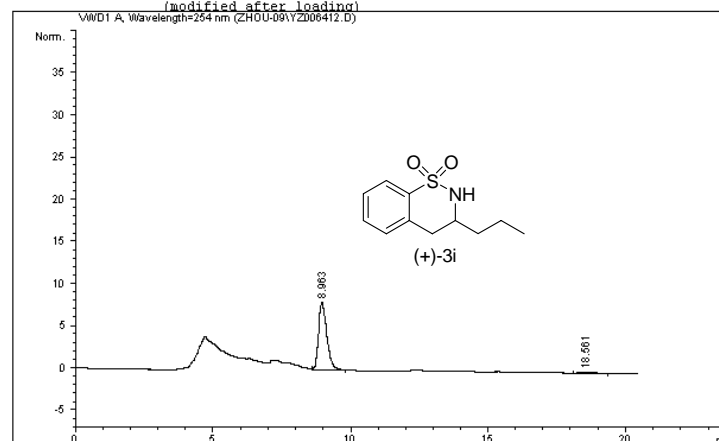

=====  
Area Percent Report  
=====

Sorted By : Signal  
Multiplier : 1.0000  
Dilution : 1.0000

Signal 1: VWD1 A, Wavelength=254 nm

| Peak # | RetTime [min] | Type | Width [min] | Area mAU  | *s         | Height [mAU] | Area %  |
|--------|---------------|------|-------------|-----------|------------|--------------|---------|
| 1      | 8.963         | VB   | 0.3261      | 167.51826 |            | 7.99169      | 97.7775 |
| 2      | 18.561        | PB   | 0.4332      | 3.80774   | 1.06119e-1 |              | 2.2225  |

Totals : 171.32600 8.09781

Results obtained with enhanced integrator!

\*\*\* End of Report \*\*\*

Supplementary Material (ESI) for Chemical Communications  
This journal is (c) The Royal Society of Chemistry 2011

Data File C:\HPCHEM\1\DATA\YFZ\C2500911.D  
AD-H, H<sub>2</sub>O/MeOH = 70/30, 0.7 mL/min, 30 °C, 254 nm

=====

Injection Date : 11/11/2010 2:10:04 PM  
Sample Name : CY-8-68A Location : Vial 1  
Acq. Operator : ZX  
Acq. Method : C:\HPCHEM\1\METHODS\SW.M  
Last changed : 11/11/2010 1:21:10 PM by ZX  
(modified after loading)  
Analysis Method : C:\HPCHEM\1\METHODS\SW.M  
Last changed : 11/11/2010 3:11:55 PM by ZX  
(modified after loading)

=====

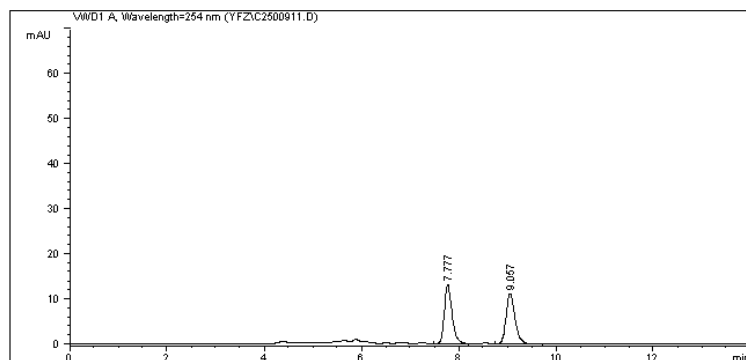

=====  
Area Percent Report  
=====

Sorted By : Signal  
Multiplier : 1.0000  
Dilution : 1.0000

Signal 1: VWD1 A, Wavelength=254 nm

| Peak # | RetTime [min] | Type | Width [min] | Area mAU  | Area %  | Height [mAU] |
|--------|---------------|------|-------------|-----------|---------|--------------|
| 1      | 7.777         | VV   | 0.1663      | 145.02368 | 50.5582 | 13.17133     |
| 2      | 9.057         | VB   | 0.1935      | 141.82162 | 49.4418 | 11.15575     |

Totals : 286.84531 24.32707

Results obtained with enhanced integrator!

\*\*\* End of Report \*\*\*

Sample Name: CY-8-68A Data File C:\HPCHEM\1\DATA\YFZ\C2500912.D  
AD-H, H<sub>2</sub>O/MeOH = 70/30, 0.7 mL/min, 30 °C, 254 nm

=====

Injection Date : 11/11/2010 2:47:29 PM  
Sample Name : CY-8-65A Location : Vial 1  
Acq. Operator : ZX  
Acq. Method : C:\HPCHEM\1\METHODS\SW.M  
Last changed : 11/11/2010 2:45:34 PM by ZX  
(modified after loading)  
Analysis Method : C:\HPCHEM\1\METHODS\SW.M  
Last changed : 11/11/2010 3:09:15 PM by ZX  
(modified after loading)

=====

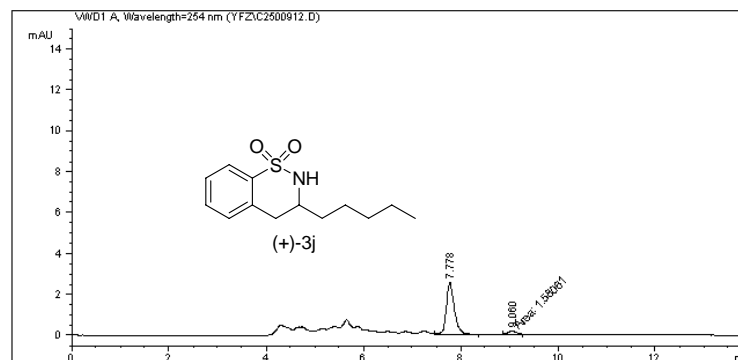

=====  
Area Percent Report  
=====

Sorted By : Signal  
Multiplier : 1.0000  
Dilution : 1.0000

Signal 1: VWD1 A, Wavelength=254 nm

| Peak # | RetTime [min] | Type | Width [min] | Area mAU | Area %  | Height [mAU] |
|--------|---------------|------|-------------|----------|---------|--------------|
| 1      | 7.778         | VB   | 0.1764      | 30.26665 | 95.0369 | 2.54800      |
| 2      | 9.060         | MM   | 0.2035      | 1.58061  | 4.9631  | 1.29459e-1   |

Totals : 31.84725 2.67746

Results obtained with enhanced integrator!

\*\*\* End of Report \*\*\*

Supplementary Material (ESI) for Chemical Communications  
This journal is (c) The Royal Society of Chemistry 2011

Data File C:\HPCHEM\1\DATA\ZHOU-09\YZ006624.D

Sample Name: CY-8-68A(+/-) Data File C:\HPCHEM\1\DATA\ZHOU-09\YZ006625.D

Sample Name: CY-8-65B

OD-H, H<sub>2</sub>O/PrOH =70/30, 0.7mL/min

OD-H, H<sub>2</sub>O/PrOH =70/30, 0.7mL/min

=====  
Injection Date : 7/27/2009 1:48:28 PM  
Sample Name : CY-8-68A(+/-) Location : Vial 1  
Acq. Operator : WANG  
Acq. Method : C:\HPCHEM\1\METHODS\2012.M  
Last changed : 7/27/2009 1:42:26 PM by WANG  
(modified after loading)  
Analysis Method : C:\HPCHEM\1\METHODS\2012.M  
Last changed : 10/19/2009 10:25:34 AM  
(modified after loading)  
=====

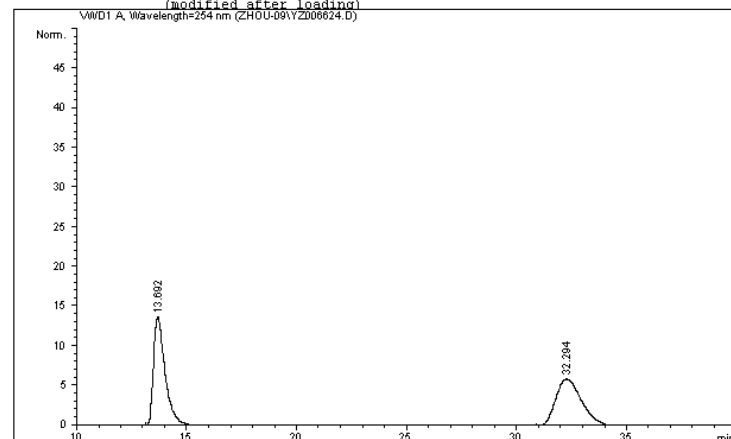

Area Percent Report

Sorted By : Signal  
Multiplier : 1.0000  
Dilution : 1.0000

Signal 1: VWD1 A, Wavelength=254 nm

| Peak # | RetTime [min] | Type | Width [min] | Area [mAU] | %s | Height [mAU] | Area %  |
|--------|---------------|------|-------------|------------|----|--------------|---------|
| 1      | 13.692        | PB   | 0.5350      | 492.24985  |    | 13.62858     | 49.9011 |
| 2      | 32.294        | PB   | 1.0024      | 494.20071  |    | 5.97760      | 50.0989 |

Totals : 986.45056 19.60618

Results obtained with enhanced integrator!

\*\*\* End of Report \*\*\*

=====  
Injection Date : 7/27/2009 2:41:15 PM  
Sample Name : CY-8-65B Location : Vial 1  
Acq. Operator : WANG  
Acq. Method : C:\HPCHEM\1\METHODS\2012.M  
Last changed : 7/27/2009 2:34:26 PM by WANG  
(modified after loading)  
Analysis Method : C:\HPCHEM\1\METHODS\SW.M  
Last changed : 7/22/2010 3:59:28 PM by ZX  
(modified after loading)  
=====

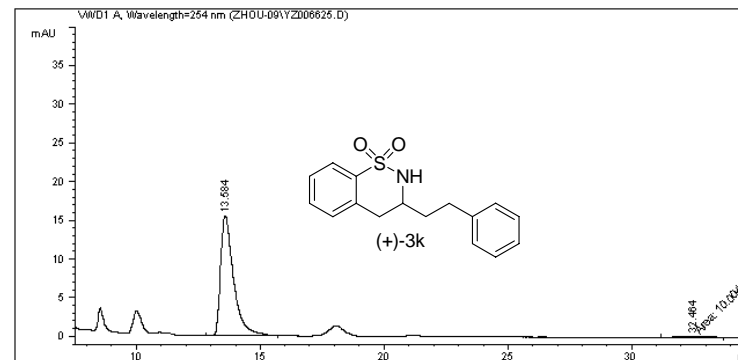

Area Percent Report

Sorted By : Signal  
Multiplier : 1.0000  
Dilution : 1.0000

Signal 1: VWD1 A, Wavelength=254 nm

| Peak # | RetTime [min] | Type | Width [min] | Area [mAU] | %s | Height [mAU] | Area %  |
|--------|---------------|------|-------------|------------|----|--------------|---------|
| 1      | 13.584        | VB   | 0.5491      | 566.07373  |    | 15.47369     | 98.2633 |
| 2      | 32.464        | MM   | 1.1006      | 10.00484   |    | 1.51508e-1   | 1.7367  |

Totals : 576.07857 15.62520

Results obtained with enhanced integrator!

\*\*\* End of Report \*\*\*

Supplementary Material (ESI) for Chemical Communications  
This journal is (c) The Royal Society of Chemistry 2011

Data File C:\HPCHEM\1\DATA\ZHOU-09\Y2006489.D

Sample Name: CY-8-52B (+/-) Data File C:\HPCHEM\1\DATA\ZHOU-09\Y2006490.D

Sample Name: CY-8-53B

OD-H, H/i-PrOH = 70/30, 0.7 mL/min

OD-H, H/i-PrOH = 70/30, 0.7 mL/min

Injection Date : 7/4/2009 11:52:32 AM  
Sample Name : CY-8-52B (+/-) Location : Vial 1  
Acq. Operator : WANG  
Acq. Method : C:\HPCHEM\1\METHODS\2012.M  
Last changed : 7/4/2009 11:48:08 AM by WANG  
(modified after loading)  
Analysis Method : C:\HPCHEM\1\METHODS\2012.M  
Last changed : 10/19/2009 11:02:44 AM  
(modified after loading)

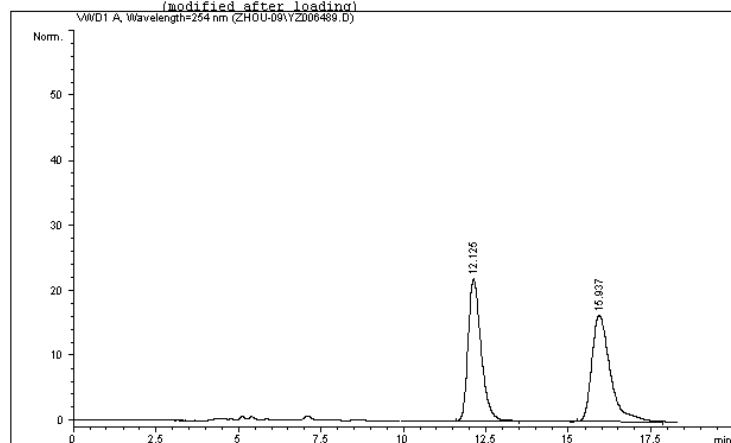

Area Percent Report

Sorted By : Signal  
Multiplier : 1.0000  
Dilution : 1.0000

Signal 1: VWD1 A, Wavelength=254 nm

| Peak # | RetTime [min] | Type | Width [min] | Area mAU  | *s | Height [mAU] | Area %  |
|--------|---------------|------|-------------|-----------|----|--------------|---------|
| 1      | 12.125        | BB   | 0.4197      | 595.33978 |    | 21.85488     | 48.4934 |
| 2      | 15.937        | BB   | 0.5864      | 632.33093 |    | 16.41004     | 51.5066 |

Totals : 1227.67072 38.26493

Results obtained with enhanced integrator!

\*\*\* End of Report \*\*\*

Injection Date : 7/4/2009 12:15:49 PM  
Sample Name : CY-8-53B Location : Vial 1  
Acq. Operator : WANG  
Acq. Method : C:\HPCHEM\1\METHODS\2012.M  
Last changed : 7/4/2009 12:10:36 PM by WANG  
(modified after loading)  
Analysis Method : C:\HPCHEM\1\METHODS\2012.M  
Last changed : 10/19/2009 11:02:48 AM  
(modified after loading)

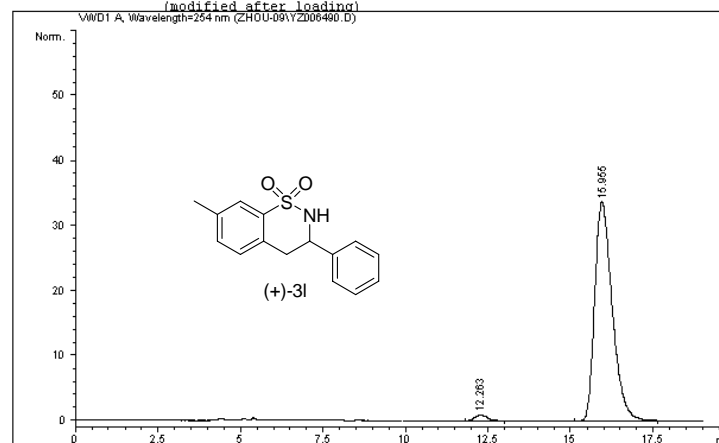

Area Percent Report

Sorted By : Signal  
Multiplier : 1.0000  
Dilution : 1.0000

Signal 1: VWD1 A, Wavelength=254 nm

| Peak # | RetTime [min] | Type | Width [min] | Area mAU   | *s | Height [mAU] | Area %  |
|--------|---------------|------|-------------|------------|----|--------------|---------|
| 1      | 12.263        | BB   | 0.3796      | 25.24533   |    | 9.33519e-1   | 1.9931  |
| 2      | 15.955        | BB   | 0.5610      | 1241.42114 |    | 33.68610     | 98.0069 |

Totals : 1266.66647 34.61962

Results obtained with enhanced integrator!

\*\*\* End of Report \*\*\*

Supplementary Material (ESI) for Chemical Communications  
This journal is (c) The Royal Society of Chemistry 2011

Data File C:\HPCHEM\1\DATA\ZHOU-09\YZ006752.D

Sample Name: CY-8-79(+/-) Data File C:\HPCHEM\1\DATA\ZHOU-09\YZ006753.D

Sample Name: CY-8-78

OD-H, H/i-PrOH =85/15, 0.8 mL/min

OD-H, H/i-PrOH =70/30, 0.7 mL/min

=====  
Injection Date : 8/29/2009 12:36:46 PM  
Sample Name : CY-8-79(+/-) Location : Vial 1  
Acq. Operator :  
Acq. Method : C:\HPCHEM\1\METHODS\2012.M  
Last changed : 8/29/2009 11:59:10 AM  
(modified after loading)  
Analysis Method : C:\HPCHEM\1\METHODS\2012.M  
Last changed : 10/19/2009 10:04:29 AM  
(modified after loading)  
=====

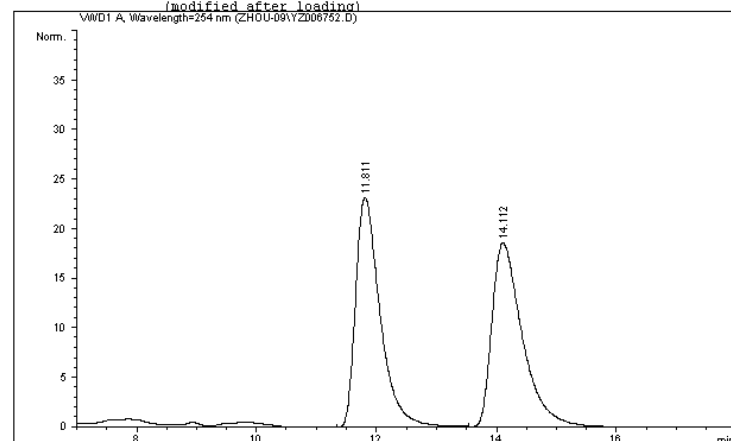

Area Percent Report

Sorted By : Signal  
Multiplier : 1.0000  
Dilution : 1.0000

Signal 1: VWD1 A, Wavelength=254 nm

| Peak # | RetTime [min] | Type | Width [min] | Area mAU  | *s | Height [mAU] | Area %  |
|--------|---------------|------|-------------|-----------|----|--------------|---------|
| 1      | 11.811        | PB   | 0.4310      | 661.22162 |    | 23.23702     | 50.4067 |
| 2      | 14.112        | BB   | 0.5341      | 650.55273 |    | 18.56136     | 49.5933 |

Totals : 1311.77435 41.79837

Results obtained with enhanced integrator!

\*\*\* End of Report \*\*\*

=====  
Injection Date : 8/29/2009 1:04:10 PM  
Sample Name : CY-8-78 Location : Vial 1  
Acq. Operator :  
Acq. Method : C:\HPCHEM\1\METHODS\2012.M  
Last changed : 8/29/2009 12:58:43 PM  
(modified after loading)  
Analysis Method : C:\HPCHEM\1\METHODS\SW.M  
Last changed : 7/22/2010 4:02:59 PM by ZX  
(modified after loading)  
=====

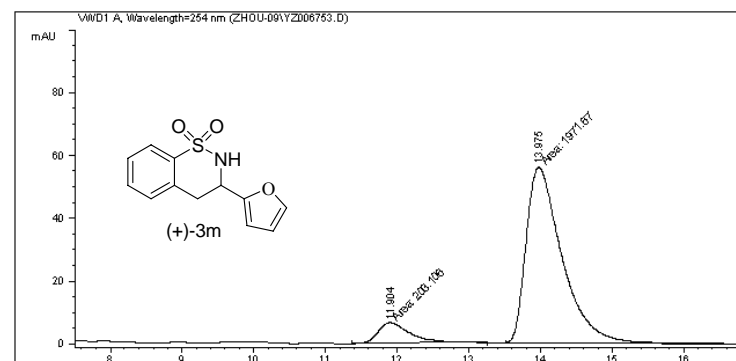

Area Percent Report

Sorted By : Signal  
Multiplier : 1.0000  
Dilution : 1.0000

Signal 1: VWD1 A, Wavelength=254 nm

| Peak # | RetTime [min] | Type | Width [min] | Area mAU   | *s | Height [mAU] | Area %  |
|--------|---------------|------|-------------|------------|----|--------------|---------|
| 1      | 11.804        | MM   | 0.5196      | 203.10611  |    | 6.51495      | 9.3392  |
| 2      | 13.975        | MM   | 0.5869      | 1971.67285 |    | 55.98711     | 90.6608 |

Totals : 2174.77896 62.50207

Results obtained with enhanced integrator!

\*\*\* End of Report \*\*\*

Supplementary Material (ESI) for Chemical Communications  
This journal is (c) The Royal Society of Chemistry 2011

Data File C:\HPCHEM\1\DATA\ZHOU-09\YZ006544.D

Sample Name: CY-8-60A(+/-) Data File C:\HPCHEM\1\DATA\ZHOU-09\YZ006556.D

Sample Name: CY-8-58A

OD-H, H/i-PrOH = 70/30, 0.7 mL/min

OD-H, H/i-PrOH = 70/30, 0.7 mL/min

=====

Injection Date : 7/13/2009 5:12:48 PM  
Sample Name : CY-8-60A(+/-) Location : Vial 1  
Acc. Operator : WANG  
Acq. Method : C:\HPCHEM\1\METHODS\2012.M  
Last changed : 7/13/2009 5:07:54 PM by WANG  
(modified after loading)  
Analysis Method : C:\HPCHEM\1\METHODS\2012.M  
Last changed : 10/19/2009 10:33:23 AM  
(modified after loading)

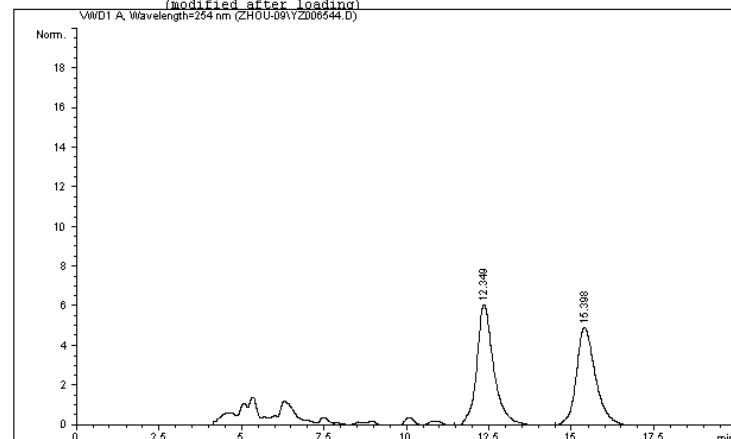

Area Percent Report

Sorted By : Signal  
Multiplier : 1.0000  
Dilution : 1.0000

Signal 1: VWD1 A, Wavelength=254 nm

| Peak # | RetTime [min] | Type | Width [min] | Area mAU  | *s | Height [mAU] | Area %  |
|--------|---------------|------|-------------|-----------|----|--------------|---------|
| 1      | 12.349        | VB   | 0.5295      | 221.04391 |    | 6.11454      | 51.9139 |
| 2      | 15.398        | BB   | 0.6169      | 204.74542 |    | 4.97619      | 48.0861 |

Totals : 425.78934 11.09073

Results obtained with enhanced integrator!

\*\*\* End of Report \*\*\*

=====

Injection Date : 7/16/2009 8:04:12 PM  
Sample Name : CY-8-58A Location : Vial 1  
Acc. Operator : WANG  
Acq. Method : C:\HPCHEM\1\METHODS\2012.M  
Last changed : 7/16/2009 7:51:51 PM by WANG  
(modified after loading)  
Analysis Method : C:\HPCHEM\1\METHODS\SW.M  
Last changed : 7/22/2010 3:56:13 PM by ZX  
(modified after loading)

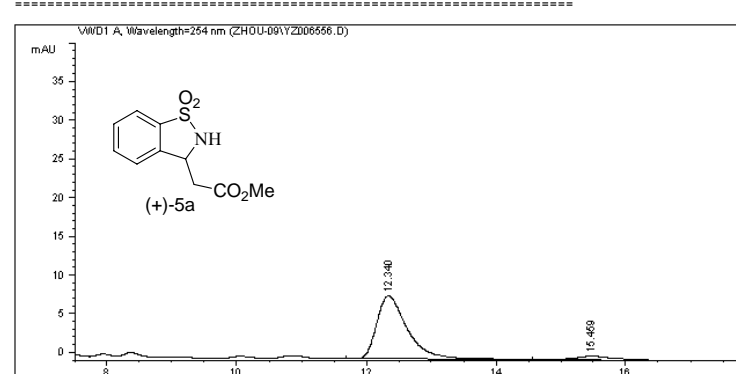

Area Percent Report

Sorted By : Signal  
Multiplier : 1.0000  
Dilution : 1.0000

Signal 1: VWD1 A, Wavelength=254 nm

| Peak # | RetTime [min] | Type | Width [min] | Area mAU  | *s | Height [mAU] | Area %  |
|--------|---------------|------|-------------|-----------|----|--------------|---------|
| 1      | 12.340        | VB   | 0.4878      | 267.50034 |    | 8.14986      | 92.9138 |
| 2      | 15.459        | BB   | 0.5129      | 20.40129  |    | 4.76220e-1   | 7.0862  |

Totals : 287.90163 8.62608

Results obtained with enhanced integrator!

\*\*\* End of Report \*\*\*



Supplementary Material (ESI) for Chemical Communications  
This journal is (c) The Royal Society of Chemistry 2011

Data File C:\HPCHEM\1\DATA\ZHOU-09\Y2006137.D

Sample Name: CY-7-47A (+/-) Data File C:\HPCHEM\1\DATA\ZHOU-09\Y2006138.D

Sample Name: CY-7-47A

OJ-H, H/i-PrOH = 70/30, 0.8 mL/min

OJ-H, H/i-PrOH = 70/30, 0.8 mL/min

=====  
Injection Date : 12/31/2008 4:15:20 PM  
Sample Name : CY-7-47A (+/-) Location : Vial 1  
Acq. Operator : WANG  
Acq. Method : C:\HPCHEM\1\METHODS\2012.M  
Last changed : 12/31/2008 4:13:53 PM by WANG  
(modified after loading)  
Analysis Method : C:\HPCHEM\1\METHODS\2012.M  
Last changed : 11/5/2009 7:02:04 PM  
(modified after loading)

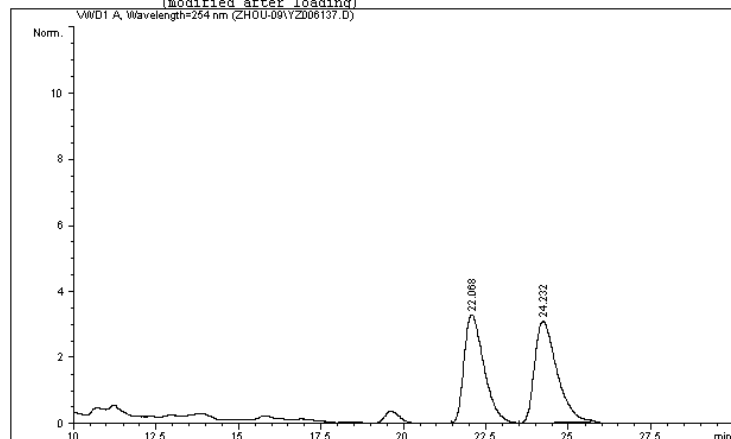

Area Percent Report

Sorted By : Signal  
Multiplier : 1.0000  
Dilution : 1.0000

Signal 1: VWD1 A, Wavelength=254 nm

| Peak # | RetTime [min] | Tvpe | Width [min] | Area mAU *s | Height [mAU] | Area %  |
|--------|---------------|------|-------------|-------------|--------------|---------|
| 1      | 22.068        | PB   | 0.6046      | 135.62302   | 3.28041      | 48.9226 |
| 2      | 24.232        | PB   | 0.6542      | 141.59677   | 3.05561      | 51.0774 |

Totals : 277.21979 6.33602

Results obtained with enhanced integrator!

\*\*\* End of Report \*\*\*

=====  
Injection Date : 12/31/2008 4:43:18 PM  
Sample Name : CY-7-47A Location : Vial 1  
Acq. Operator : WANG  
Acq. Method : C:\HPCHEM\1\METHODS\2012.M  
Last changed : 12/31/2008 4:41:11 PM by WANG  
(modified after loading)  
Analysis Method : C:\HPCHEM\1\METHODS\2012.M  
Last changed : 11/5/2009 7:04:04 PM  
(modified after loading)

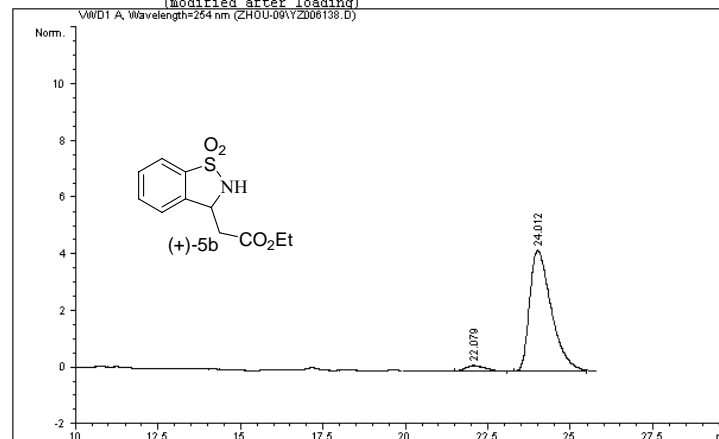

Area Percent Report

Sorted By : Signal  
Multiplier : 1.0000  
Dilution : 1.0000

Signal 1: VWD1 A, Wavelength=254 nm

| Peak # | RetTime [min] | Tvpe | Width [min] | Area mAU *s | Height [mAU] | Area %  |
|--------|---------------|------|-------------|-------------|--------------|---------|
| 1      | 22.079        | BB   | 0.5207      | 8.45855     | 1.98402e-1   | 4.1944  |
| 2      | 24.012        | PB   | 0.6579      | 193.20268   | 4.25496      | 95.8056 |

Totals : 201.66123 4.45337

Results obtained with enhanced integrator!

\*\*\* End of Report \*\*\*

Supplementary Material (ESI) for Chemical Communications  
This journal is (c) The Royal Society of Chemistry 2011

Data File C:\HPCHEM\1\DATA\ZHOU-09\YZ006530.D

Sample Name: CY-8-60B Data File C:\HPCHEM\1\DATA\ZHOU-09\YZ006546.D

Sample Name: CY-8-58B

OD-H, H/i-PrOH = 70/30, 0.7 mL/min

OD-H, H/i-PrOH = 70/30, 0.7 mL/min

=====

Injection Date : 7/11/2009 11:50:43 AM  
Sample Name : CY-8-60B Location : Vial 1  
Acq. Operator : WANG  
Acq. Method : C:\HPCHEM\1\METHODS\2012.M  
Last changed : 7/11/2009 11:49:04 AM by WANG  
(modified after loading)  
Analysis Method : C:\HPCHEM\1\METHODS\2012.M  
Last changed : 10/19/2009 10:49:21 AM  
(modified after loading)

=====

Injection Date : 7/13/2009 6:09:00 PM  
Sample Name : CY-8-58B Location : Vial 1  
Acq. Operator : WANG  
Acq. Method : C:\HPCHEM\1\METHODS\2012.M  
Last changed : 7/13/2009 6:04:43 PM by WANG  
(modified after loading)  
Analysis Method : C:\HPCHEM\1\METHODS\SW.M  
Last changed : 7/23/2010 3:01:40 PM by ZX  
(modified after loading)

=====

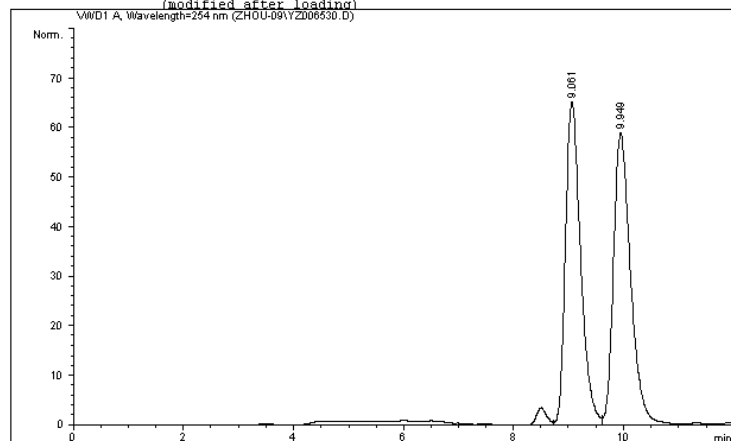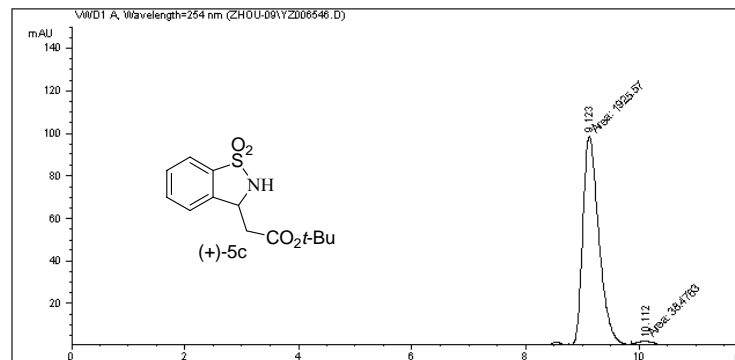

=====

Area Percent Report

=====

=====

Area Percent Report

=====

Sorted By : Signal  
Multiplier : 1.0000  
Dilution : 1.0000

Sorted By : Signal  
Multiplier : 1.0000  
Dilution : 1.0000

Signal 1: VWD1 A, Wavelength=254 nm

Signal 1: VWD1 A, Wavelength=254 nm

| Peak # | RetTime [min] | Type | Width [min] | Area mAU   | *s | Height [mAU] | Area %  |
|--------|---------------|------|-------------|------------|----|--------------|---------|
| 1      | 9.061         | VV   | 0.2944      | 1253.74219 |    | 65.16142     | 49.4300 |
| 2      | 9.949         | VV   | 0.3327      | 1282.65881 |    | 58.90273     | 50.5700 |

| Peak # | RetTime [min] | Type | Width [min] | Area mAU   | *s | Height [mAU] | Area %  |
|--------|---------------|------|-------------|------------|----|--------------|---------|
| 1      | 9.123         | MM   | 0.3260      | 1925.57471 |    | 98.43872     | 98.0410 |
| 2      | 10.112        | MM   | 0.3251      | 38.47634   |    | 1.97232      | 1.9590  |

Totals : 2536.40100 124.06414

Totals : 1964.05105 100.41104

Results obtained with enhanced integrator!

Results obtained with enhanced integrator!

\*\*\* End of Report \*\*\*

\*\*\* End of Report \*\*\*

Supplementary Material (ESI) for Chemical Communications  
This journal is (c) The Royal Society of Chemistry 2011

Data File C:\HPCHEM\1\DATA\ZHOU-09\YZ007291.D

Sample Name: CY-8-64B(+/-) Data File C:\HPCHEM\1\DATA\ZHOU-09\YZ007290.D

Sample Name: CY-8-64B

OD-H, H/i-PrOH = 70/30, 0.7 mL/min

OD-H, H/i-PrOH = 70/30, 0.7 mL/min

=====

Injection Date : 11/2/2009 8:35:46 PM  
Sample Name : CY-8-64B(+/-) Location : Vial 1  
Acq. Operator :  
Acq. Method : C:\HPCHEM\1\METHODS\SW.M  
Last changed : 11/2/2009 7:41:34 PM  
(modified after loading)  
Analysis Method : C:\HPCHEM\1\METHODS\2012.M  
Last changed : 11/5/2009 7:06:55 PM  
(modified after loading)

=====

Injection Date : 11/2/2009 7:55:20 PM  
Sample Name : CY-8-64B Location : Vial 1  
Acq. Operator :  
Acq. Method : C:\HPCHEM\1\METHODS\SW.M  
Last changed : 11/2/2009 7:41:34 PM  
(modified after loading)  
Analysis Method : C:\HPCHEM\1\METHODS\2012.M  
Last changed : 11/5/2009 7:06:51 PM  
(modified after loading)

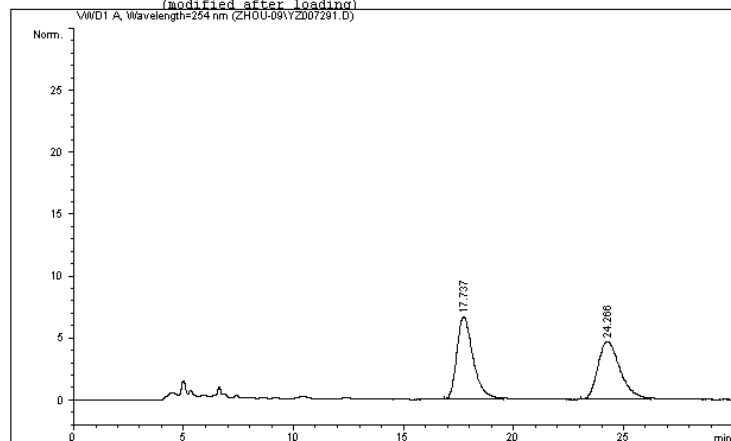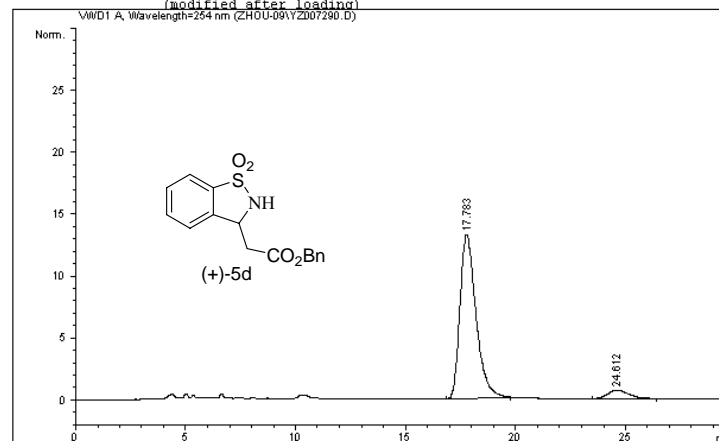

Area Percent Report

Sorted By : Signal  
Multiplier : 1.0000  
Dilution : 1.0000

Signal 1: VWD1 A, Wavelength=254 nm

| Peak # | RetTime [min] | Type | Width [min] | Area mAU  | s | Height [mAU] | Area %  |
|--------|---------------|------|-------------|-----------|---|--------------|---------|
| 1      | 17.737        | BB   | 0.7721      | 336.12210 |   | 6.62894      | 51.1150 |
| 2      | 24.266        | BB   | 1.0424      | 321.45767 |   | 4.66674      | 48.8850 |

Totals : 657.57977 11.29568

Results obtained with enhanced integrator!

\*\*\* End of Report \*\*\*

Area Percent Report

Sorted By : Signal  
Multiplier : 1.0000  
Dilution : 1.0000

Signal 1: VWD1 A, Wavelength=254 nm

| Peak # | RetTime [min] | Type | Width [min] | Area mAU  | s | Height [mAU] | Area %  |
|--------|---------------|------|-------------|-----------|---|--------------|---------|
| 1      | 17.783        | PB   | 0.7782      | 669.59509 |   | 13.19926     | 93.2223 |
| 2      | 24.612        | PB   | 0.8280      | 48.68282  |   | 6.93286e-1   | 6.7777  |

Totals : 718.27791 13.89255

Results obtained with enhanced integrator!

\*\*\* End of Report \*\*\*

Supplementary Material (ESI) for Chemical Communications  
This journal is (c) The Royal Society of Chemistry 2011

Data File C:\HPCHEM\1\DATA\ZHOU-09\Y2006649.D

Sample Name: CY-8-63(+/-) Data File C:\HPCHEM\1\DATA\ZHOU-09\Y2006650.D

Sample Name: CY-8-72

AS-H, H/i-PrOH =80/20, 0.8mL/min

OJ-H, H/i-PrOH =80/20, 0.8mL/min

Injection Date : 8/15/2009 3:56:17 PM  
Sample Name : CY-8-63(+/-) Location : Vial 1  
Acq. Operator : WANG  
Acq. Method : C:\HPCHEM\1\METHODS\2012.M  
Last changed : 8/15/2009 3:53:14 PM by WANG  
(modified after loading)  
Analysis Method : C:\HPCHEM\1\METHODS\2012.M  
Last changed : 10/19/2009 10:10:28 AM  
(modified after loading)

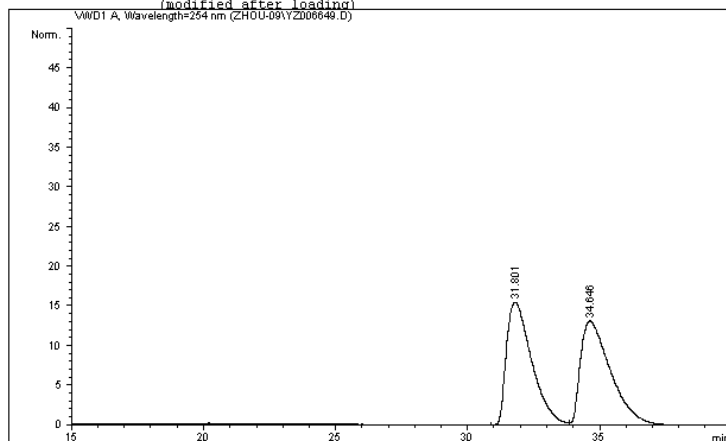

Area Percent Report

Sorted By : Signal  
Multiplier : 1.0000  
Dilution : 1.0000

Signal 1: VWD1 A, Wavelength=254 nm

| Peak # | RetTime [min] | Type | Width [min] | Area mAU   | *s | Height [mAU] | Area %  |
|--------|---------------|------|-------------|------------|----|--------------|---------|
| 1      | 31.801        | BV   | 0.9699      | 1022.71344 |    | 15.45791     | 49.8942 |
| 2      | 34.646        | VB   | 1.1093      | 1027.05078 |    | 13.06477     | 50.1058 |

Totals : 2049.76422 28.52268

Results obtained with enhanced integrator!

\*\*\* End of Report \*\*\*

Injection Date : 8/15/2009 4:40:12 PM  
Sample Name : CY-8-72 Location : Vial 1  
Acq. Operator : WANG  
Acq. Method : C:\HPCHEM\1\METHODS\2012.M  
Last changed : 8/15/2009 4:36:51 PM by WANG  
(modified after loading)  
Analysis Method : C:\HPCHEM\1\METHODS\2012.M  
Last changed : 10/19/2009 10:12:16 AM  
(modified after loading)

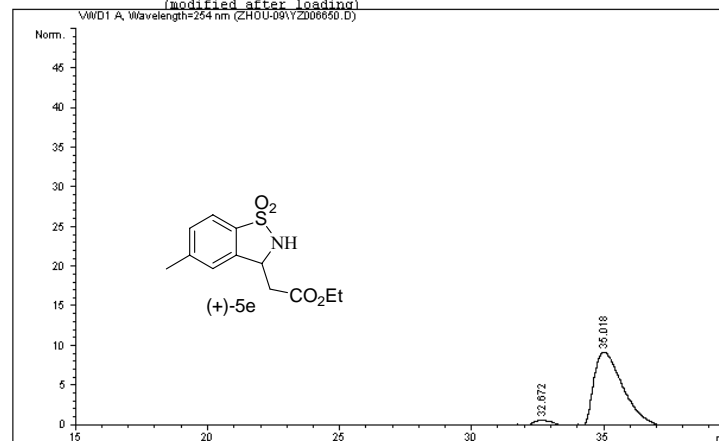

Area Percent Report

Sorted By : Signal  
Multiplier : 1.0000  
Dilution : 1.0000

Signal 1: VWD1 A, Wavelength=254 nm

| Peak # | RetTime [min] | Type | Width [min] | Area mAU  | *s | Height [mAU] | Area %  |
|--------|---------------|------|-------------|-----------|----|--------------|---------|
| 1      | 32.672        | PV   | 0.6908      | 49.73135  |    | 8.65418e-1   | 6.3755  |
| 2      | 35.018        | VB   | 1.1101      | 730.30341 |    | 9.43135      | 93.6245 |

Totals : 780.03476 10.29677

Results obtained with enhanced integrator!

\*\*\* End of Report \*\*\*
